# Supplementary material for: Database for liquid phase diffusion coefficients at infinite dilution at 298 K and matrix completion methods for their prediction
Source: Royal Society of Chemistry journal article supplement (doi:10.1039/d2dd00073c), 2022-01-01
Supplement: d2dd00073c1.xlsx [file d2dd00073c1.xlsx]

## Sheet: Diffusion Calculation Tool
### Diffusion Calculation Tool ###
Please select the systems for which you wish to retreive the predicted diffusion coefficients by: (1) selecting your substances by DDB No. or name → to do this, click the respective arrow buttons to open drop-down menus for both the solute i and the solvent j (2) selecting the prediction method (MCM-Boosting or MCM-Whisky) from the respective drop-down menu
Solutes i		Solvents j		Prediction
DDB No.	Name	DDB No.	Name	Method	Dij∞ (in 1E-9 m²/s)	STD(Dij∞) (in 1E-9 m²/s)
2	Acetamide	3	Acetonitrile	MCM-Boosting	3.47788	0.279897
2	Acetamide	4	Acetone	MCM-Boosting	4.08132	0.519659
2	Acetamide	11	Ethanol	MCM-Boosting	1.09635	0.590853
2	Acetamide	12	Diethyl ether	MCM-Boosting	6.16521	0.705963
2	Acetamide	21	Ethyl acetate	MCM-Boosting	3.40769	0.738786
2	Acetamide	25	Ethylbenzene	MCM-Boosting	2.17538	50.6468
2	Acetamide	26	Bromobenzene	MCM-Boosting	1.47051	1.22294
2	Acetamide	27	Chlorobenzene	MCM-Boosting	2.10702	0.994104
2	Acetamide	30	Nitrobenzene	MCM-Boosting	0.85807	1.73547
2	Acetamide	31	Benzene	MCM-Boosting	2.16537	0.303303
2	Acetamide	39	1-Butanol	MCM-Boosting	0.498138	1.50799
2	Acetamide	40	2-Butanone	MCM-Boosting	3.1603	1.50541
2	Acetamide	46	Butyl chloride	MCM-Boosting	3.26711	0.92134
2	Acetamide	47	Chloroform	MCM-Boosting	2.89275	0.228159
2	Acetamide	50	Cyclohexane	MCM-Boosting	1.42462	0.846866
2	Acetamide	60	Decane	MCM-Boosting	1.76679	1.78716
2	Acetamide	72	N,N-Dimethylformamide (DMF)	MCM-Boosting	1.61582	1.1829
2	Acetamide	78	Dodecane	MCM-Boosting	1.28462	1.47274
2	Acetamide	80	Butyl acetate	MCM-Boosting	2.13387	0.487472
2	Acetamide	89	Hexane	MCM-Boosting	4.75052	0.15429
2	Acetamide	91	Heptane	MCM-Boosting	3.72247	0.0864493
2	Acetamide	97	2,2,4-Trimethylpentane	MCM-Boosting	3.29877	0.928341
2	Acetamide	110	Methanol	MCM-Boosting	2.05454	0.480701
2	Acetamide	112	3-Methylpentane	MCM-Boosting	5.0538	23.453
2	Acetamide	140	1-Propanol	MCM-Boosting	0.637471	0.648289
2	Acetamide	157	Tetrachloromethane	MCM-Boosting	1.75987	0.160258
2	Acetamide	161	Toluene	MCM-Boosting	2.39475	0.444783
2	Acetamide	174	Water	MCM-Boosting	1.20543	0.169595
2	Acetamide	250	Cyclohexanone	MCM-Boosting	0.602839	39.5927
2	Acetamide	282	1,2-Propanediol	MCM-Boosting	0.0331172	0.868338
2	Acetamide	284	N-Methyl-2-pyrrolidone	MCM-Boosting	0.755653	0.312578
2	Acetamide	297	Hexafluorobenzene	MCM-Boosting	1.95989	0.306514
2	Acetamide	367	2,3-Dimethylbutane	MCM-Boosting	3.84599	5.2756
2	Acetamide	430	Methyl isopropyl ketone	MCM-Boosting	2.57792	0.696831
2	Acetamide	451	Carbonic acid dimethyl ester	MCM-Boosting	2.44238	0.945203
2	Acetamide	516	Hexadecane	MCM-Boosting	0.659615	1.87969
2	Acetamide	887	Deuterium oxide <Heavy water>	MCM-Boosting	0.972931	0.165519
2	Acetamide	982	Perdeuteromethanol	MCM-Boosting	1.85676	0.359788
2	Acetamide	1090	2,2-Dimethylpentane	MCM-Boosting	2.97432	9.50739
2	Acetamide	3410	1,3,5-Triisopropylbenzene	MCM-Boosting	0.476869	0.98173
2	Acetamide	4331	Hexamethyltetracosane	MCM-Boosting	0.0897058	16.2146
2	Acetamide	16447	1-Ethyl-3-methylimidazolium bis(trifluoromethylsulfonyl)imide	MCM-Boosting	0.0473606	3.09463
2	Acetamide	16583	1-Butyl-3-methylimidazolium bis(trifluoromethylsulfonyl)imide	MCM-Boosting	0.0465716	3.15054
2	Acetamide	16810	1-Octyl-3-methylimidazolium tetrafluoroborate	MCM-Boosting	0.00476779	18.4754
2	Acetamide	18162	1-Hexyl-3-methylimidazolium bis(trifluoromethylsulfonyl)imide	MCM-Boosting	0.0305388	2.32695
2	Acetamide	18174	1-Hexyl-3-methylimidazolium tetrafluoroborate	MCM-Boosting	0.005394	11.1509
2	Acetamide	18642	1-Ethyl-3-methylimidazolium bis(pentafluoroethylsulfonyl)imide	MCM-Boosting	0.0328373	2.11052
2	Acetamide	18988	1-Ethyl-3-methylimidazolium trifluoromethylsulfonate	MCM-Boosting	0.0435938	2.09076
2	Acetamide	20138	1-Butyl-3-methylimidazolium dicyanamide	MCM-Boosting	0.0663351	67.0851
2	Acetamide	22417	1-Ethyl-3-methylimidazolium trifluoroacetate	MCM-Boosting	0.058693	1.37373
2	Acetamide	22674	1-Butyl-3-methylpyridinium tetrafluoroborate	MCM-Boosting	0.00904542	6.76537
3	Acetonitrile	3	Acetonitrile	MCM-Boosting	4.35668	0.19192
3	Acetonitrile	4	Acetone	MCM-Boosting	5.1937	0.340171
3	Acetonitrile	11	Ethanol	MCM-Boosting	1.39551	0.369013
3	Acetonitrile	12	Diethyl ether	MCM-Boosting	7.25588	0.565562
3	Acetonitrile	21	Ethyl acetate	MCM-Boosting	4.02514	0.540901
3	Acetonitrile	25	Ethylbenzene	MCM-Boosting	2.75593	1.91109
3	Acetonitrile	26	Bromobenzene	MCM-Boosting	1.92277	0.499249
3	Acetonitrile	27	Chlorobenzene	MCM-Boosting	2.82055	0.524341
3	Acetonitrile	30	Nitrobenzene	MCM-Boosting	0.98054	0.783297
3	Acetonitrile	31	Benzene	MCM-Boosting	2.47779	0.225842
3	Acetonitrile	39	1-Butanol	MCM-Boosting	0.632352	0.723919
3	Acetonitrile	40	2-Butanone	MCM-Boosting	4.03358	0.724246
3	Acetonitrile	46	Butyl chloride	MCM-Boosting	4.01449	0.441413
3	Acetonitrile	47	Chloroform	MCM-Boosting	3.59238	0.162799
3	Acetonitrile	50	Cyclohexane	MCM-Boosting	1.70107	0.520296
3	Acetonitrile	60	Decane	MCM-Boosting	2.31178	0.791246
3	Acetonitrile	72	N,N-Dimethylformamide (DMF)	MCM-Boosting	1.97895	2.31325
3	Acetonitrile	78	Dodecane	MCM-Boosting	1.49814	0.634309
3	Acetonitrile	80	Butyl acetate	MCM-Boosting	2.7402	0.344385
3	Acetonitrile	89	Hexane	MCM-Boosting	5.95139	0.108638
3	Acetonitrile	91	Heptane	MCM-Boosting	4.58946	0.0626723
3	Acetonitrile	97	2,2,4-Trimethylpentane	MCM-Boosting	3.88891	0.638007
3	Acetonitrile	110	Methanol	MCM-Boosting	2.56971	0.306573
3	Acetonitrile	112	3-Methylpentane	MCM-Boosting	6.00418	1.78152
3	Acetonitrile	140	1-Propanol	MCM-Boosting	0.812288	0.396517
3	Acetonitrile	157	Tetrachloromethane	MCM-Boosting	2.19214	0.117243
3	Acetonitrile	161	Toluene	MCM-Boosting	2.74279	0.284301
3	Acetonitrile	174	Water	MCM-Boosting	1.52631	0.113981
3	Acetonitrile	250	Cyclohexanone	MCM-Boosting	0.710338	5.02636
3	Acetonitrile	282	1,2-Propanediol	MCM-Boosting	0.0442725	0.505801
3	Acetonitrile	284	N-Methyl-2-pyrrolidone	MCM-Boosting	0.931054	0.247901
3	Acetonitrile	297	Hexafluorobenzene	MCM-Boosting	2.40995	0.228997
3	Acetonitrile	367	2,3-Dimethylbutane	MCM-Boosting	4.86527	2.31865
3	Acetonitrile	430	Methyl isopropyl ketone	MCM-Boosting	3.38445	0.406501
3	Acetonitrile	451	Carbonic acid dimethyl ester	MCM-Boosting	3.05631	0.387074
3	Acetonitrile	516	Hexadecane	MCM-Boosting	0.766699	1.01743
3	Acetonitrile	887	Deuterium oxide <Heavy water>	MCM-Boosting	1.15155	0.140201
3	Acetonitrile	982	Perdeuteromethanol	MCM-Boosting	2.10371	0.285822
3	Acetonitrile	1090	2,2-Dimethylpentane	MCM-Boosting	3.63464	2.02393
3	Acetonitrile	3410	1,3,5-Triisopropylbenzene	MCM-Boosting	0.531038	0.655277
3	Acetonitrile	4331	Hexamethyltetracosane	MCM-Boosting	0.0907213	5.04743
3	Acetonitrile	16447	1-Ethyl-3-methylimidazolium bis(trifluoromethylsulfonyl)imide	MCM-Boosting	0.0644462	1.49126
3	Acetonitrile	16583	1-Butyl-3-methylimidazolium bis(trifluoromethylsulfonyl)imide	MCM-Boosting	0.0505836	1.75826
3	Acetonitrile	16810	1-Octyl-3-methylimidazolium tetrafluoroborate	MCM-Boosting	0.00702315	4.57075
3	Acetonitrile	18162	1-Hexyl-3-methylimidazolium bis(trifluoromethylsulfonyl)imide	MCM-Boosting	0.0415222	1.07541
3	Acetonitrile	18174	1-Hexyl-3-methylimidazolium tetrafluoroborate	MCM-Boosting	0.00766718	4.73977
3	Acetonitrile	18642	1-Ethyl-3-methylimidazolium bis(pentafluoroethylsulfonyl)imide	MCM-Boosting	0.0432489	1.01397
3	Acetonitrile	18988	1-Ethyl-3-methylimidazolium trifluoromethylsulfonate	MCM-Boosting	0.0588863	1.05596
3	Acetonitrile	20138	1-Butyl-3-methylimidazolium dicyanamide	MCM-Boosting	0.0657717	8.45153
3	Acetonitrile	22417	1-Ethyl-3-methylimidazolium trifluoroacetate	MCM-Boosting	0.0782496	0.792944
3	Acetonitrile	22674	1-Butyl-3-methylpyridinium tetrafluoroborate	MCM-Boosting	0.0126394	2.99222
4	Acetone	3	Acetonitrile	MCM-Boosting	3.89764	0.103346
4	Acetone	4	Acetone	MCM-Boosting	5.57471	0.0957043
4	Acetone	11	Ethanol	MCM-Boosting	1.59693	0.0752705
4	Acetone	12	Diethyl ether	MCM-Boosting	6.30021	0.382705
4	Acetone	21	Ethyl acetate	MCM-Boosting	2.44316	0.327594
4	Acetone	25	Ethylbenzene	MCM-Boosting	2.34296	1.13767
4	Acetone	26	Bromobenzene	MCM-Boosting	1.91339	0.267089
4	Acetone	27	Chlorobenzene	MCM-Boosting	2.13283	0.479123
4	Acetone	30	Nitrobenzene	MCM-Boosting	0.56119	0.532184
4	Acetone	31	Benzene	MCM-Boosting	2.46811	0.13133
4	Acetone	39	1-Butanol	MCM-Boosting	0.880216	0.12978
4	Acetone	40	2-Butanone	MCM-Boosting	5.35653	0.182547
4	Acetone	46	Butyl chloride	MCM-Boosting	3.45921	0.321144
4	Acetone	47	Chloroform	MCM-Boosting	2.84208	0.127269
4	Acetone	50	Cyclohexane	MCM-Boosting	2.27635	0.128969
4	Acetone	60	Decane	MCM-Boosting	2.5374	0.249286
4	Acetone	72	N,N-Dimethylformamide (DMF)	MCM-Boosting	1.97984	0.297772
4	Acetone	78	Dodecane	MCM-Boosting	0.81145	0.402836
4	Acetone	80	Butyl acetate	MCM-Boosting	2.72774	0.135316
4	Acetone	89	Hexane	MCM-Boosting	5.15741	0.0718742
4	Acetone	91	Heptane	MCM-Boosting	3.89402	0.0485754
4	Acetone	97	2,2,4-Trimethylpentane	MCM-Boosting	3.07042	0.521425
4	Acetone	110	Methanol	MCM-Boosting	2.84618	0.0687339
4	Acetone	112	3-Methylpentane	MCM-Boosting	4.85331	1.37188
4	Acetone	140	1-Propanol	MCM-Boosting	0.948906	0.0810119
4	Acetone	157	Tetrachloromethane	MCM-Boosting	1.9222	0.0796918
4	Acetone	161	Toluene	MCM-Boosting	2.96047	0.15692
4	Acetone	174	Water	MCM-Boosting	1.12511	0.0903609
4	Acetone	250	Cyclohexanone	MCM-Boosting	0.943858	1.16063
4	Acetone	282	1,2-Propanediol	MCM-Boosting	0.0480674	0.143136
4	Acetone	284	N-Methyl-2-pyrrolidone	MCM-Boosting	0.879622	0.11836
4	Acetone	297	Hexafluorobenzene	MCM-Boosting	1.83974	0.18287
4	Acetone	367	2,3-Dimethylbutane	MCM-Boosting	3.89828	0.845416
4	Acetone	430	Methyl isopropyl ketone	MCM-Boosting	3.42664	0.140296
4	Acetone	451	Carbonic acid dimethyl ester	MCM-Boosting	2.38327	0.419804
4	Acetone	516	Hexadecane	MCM-Boosting	0.298884	0.499953
4	Acetone	887	Deuterium oxide <Heavy water>	MCM-Boosting	0.93019	0.120965
4	Acetone	982	Perdeuteromethanol	MCM-Boosting	2.13839	0.179276
4	Acetone	1090	2,2-Dimethylpentane	MCM-Boosting	3.29389	1.31162
4	Acetone	3410	1,3,5-Triisopropylbenzene	MCM-Boosting	0.511443	0.459326
4	Acetone	4331	Hexamethyltetracosane	MCM-Boosting	0.0221957	1.98999
4	Acetone	16447	1-Ethyl-3-methylimidazolium bis(trifluoromethylsulfonyl)imide	MCM-Boosting	0.104686	0.157199
4	Acetone	16583	1-Butyl-3-methylimidazolium bis(trifluoromethylsulfonyl)imide	MCM-Boosting	0.0201689	0.945759
4	Acetone	16810	1-Octyl-3-methylimidazolium tetrafluoroborate	MCM-Boosting	0.0164102	0.156523
4	Acetone	18162	1-Hexyl-3-methylimidazolium bis(trifluoromethylsulfonyl)imide	MCM-Boosting	0.0663006	0.122171
4	Acetone	18174	1-Hexyl-3-methylimidazolium tetrafluoroborate	MCM-Boosting	0.0190599	0.168312
4	Acetone	18642	1-Ethyl-3-methylimidazolium bis(pentafluoroethylsulfonyl)imide	MCM-Boosting	0.0620409	0.17512
4	Acetone	18988	1-Ethyl-3-methylimidazolium trifluoromethylsulfonate	MCM-Boosting	0.0845734	0.17756
4	Acetone	20138	1-Butyl-3-methylimidazolium dicyanamide	MCM-Boosting	0.0111356	2.93666
4	Acetone	22417	1-Ethyl-3-methylimidazolium trifluoroacetate	MCM-Boosting	0.0964288	0.167042
4	Acetone	22674	1-Butyl-3-methylpyridinium tetrafluoroborate	MCM-Boosting	0.0254375	0.16132
8	1,2-Ethanediol	3	Acetonitrile	MCM-Boosting	3.33742	0.285251
8	1,2-Ethanediol	4	Acetone	MCM-Boosting	4.00714	0.473879
8	1,2-Ethanediol	11	Ethanol	MCM-Boosting	1.08901	0.530493
8	1,2-Ethanediol	12	Diethyl ether	MCM-Boosting	6.08468	0.604498
8	1,2-Ethanediol	21	Ethyl acetate	MCM-Boosting	3.26422	0.941235
8	1,2-Ethanediol	25	Ethylbenzene	MCM-Boosting	2.24702	21.1795
8	1,2-Ethanediol	26	Bromobenzene	MCM-Boosting	1.42794	1.09469
8	1,2-Ethanediol	27	Chlorobenzene	MCM-Boosting	1.79894	1.48054
8	1,2-Ethanediol	30	Nitrobenzene	MCM-Boosting	0.813989	2.56355
8	1,2-Ethanediol	31	Benzene	MCM-Boosting	2.30053	0.278032
8	1,2-Ethanediol	39	1-Butanol	MCM-Boosting	0.503371	1.07419
8	1,2-Ethanediol	40	2-Butanone	MCM-Boosting	3.20662	1.29799
8	1,2-Ethanediol	46	Butyl chloride	MCM-Boosting	3.29904	0.666375
8	1,2-Ethanediol	47	Chloroform	MCM-Boosting	2.72912	0.257822
8	1,2-Ethanediol	50	Cyclohexane	MCM-Boosting	1.52899	0.724366
8	1,2-Ethanediol	60	Decane	MCM-Boosting	1.83413	6.17298
8	1,2-Ethanediol	72	N,N-Dimethylformamide (DMF)	MCM-Boosting	1.6533	0.837264
8	1,2-Ethanediol	78	Dodecane	MCM-Boosting	1.2261	1.13043
8	1,2-Ethanediol	80	Butyl acetate	MCM-Boosting	2.14952	0.436716
8	1,2-Ethanediol	89	Hexane	MCM-Boosting	4.63089	0.151818
8	1,2-Ethanediol	91	Heptane	MCM-Boosting	3.63371	0.0805743
8	1,2-Ethanediol	97	2,2,4-Trimethylpentane	MCM-Boosting	2.90649	1.1893
8	1,2-Ethanediol	110	Methanol	MCM-Boosting	2.04938	0.433944
8	1,2-Ethanediol	112	3-Methylpentane	MCM-Boosting	4.66125	5.24345
8	1,2-Ethanediol	140	1-Propanol	MCM-Boosting	0.628341	0.613746
8	1,2-Ethanediol	157	Tetrachloromethane	MCM-Boosting	1.7298	0.164681
8	1,2-Ethanediol	161	Toluene	MCM-Boosting	2.58684	0.368406
8	1,2-Ethanediol	174	Water	MCM-Boosting	1.08838	0.205264
8	1,2-Ethanediol	250	Cyclohexanone	MCM-Boosting	0.766836	38.0438
8	1,2-Ethanediol	282	1,2-Propanediol	MCM-Boosting	0.0311675	0.872256
8	1,2-Ethanediol	284	N-Methyl-2-pyrrolidone	MCM-Boosting	0.743608	0.332934
8	1,2-Ethanediol	297	Hexafluorobenzene	MCM-Boosting	1.90571	0.414783
8	1,2-Ethanediol	367	2,3-Dimethylbutane	MCM-Boosting	3.77101	4.42491
8	1,2-Ethanediol	430	Methyl isopropyl ketone	MCM-Boosting	2.45917	0.619137
8	1,2-Ethanediol	451	Carbonic acid dimethyl ester	MCM-Boosting	2.44973	0.632014
8	1,2-Ethanediol	516	Hexadecane	MCM-Boosting	0.590382	2.23265
8	1,2-Ethanediol	887	Deuterium oxide <Heavy water>	MCM-Boosting	0.931991	0.18076
8	1,2-Ethanediol	982	Perdeuteromethanol	MCM-Boosting	1.94749	0.351495
8	1,2-Ethanediol	1090	2,2-Dimethylpentane	MCM-Boosting	3.15486	11.6315
8	1,2-Ethanediol	3410	1,3,5-Triisopropylbenzene	MCM-Boosting	0.501145	1.1412
8	1,2-Ethanediol	4331	Hexamethyltetracosane	MCM-Boosting	0.0796496	15.978
8	1,2-Ethanediol	16447	1-Ethyl-3-methylimidazolium bis(trifluoromethylsulfonyl)imide	MCM-Boosting	0.0475629	2.58418
8	1,2-Ethanediol	16583	1-Butyl-3-methylimidazolium bis(trifluoromethylsulfonyl)imide	MCM-Boosting	0.0443245	3.39516
8	1,2-Ethanediol	16810	1-Octyl-3-methylimidazolium tetrafluoroborate	MCM-Boosting	0.00490458	8.68956
8	1,2-Ethanediol	18162	1-Hexyl-3-methylimidazolium bis(trifluoromethylsulfonyl)imide	MCM-Boosting	0.0313078	1.99245
8	1,2-Ethanediol	18174	1-Hexyl-3-methylimidazolium tetrafluoroborate	MCM-Boosting	0.00553833	12.8069
8	1,2-Ethanediol	18642	1-Ethyl-3-methylimidazolium bis(pentafluoroethylsulfonyl)imide	MCM-Boosting	0.0338597	1.69056
8	1,2-Ethanediol	18988	1-Ethyl-3-methylimidazolium trifluoromethylsulfonate	MCM-Boosting	0.0431865	2.07116
8	1,2-Ethanediol	20138	1-Butyl-3-methylimidazolium dicyanamide	MCM-Boosting	0.0587814	54.7564
8	1,2-Ethanediol	22417	1-Ethyl-3-methylimidazolium trifluoroacetate	MCM-Boosting	0.0565619	1.70849
8	1,2-Ethanediol	22674	1-Butyl-3-methylpyridinium tetrafluoroborate	MCM-Boosting	0.00918099	5.39561
11	Ethanol	3	Acetonitrile	MCM-Boosting	3.93378	0.210923
11	Ethanol	4	Acetone	MCM-Boosting	4.85017	0.344194
11	Ethanol	11	Ethanol	MCM-Boosting	1.31451	0.39635
11	Ethanol	12	Diethyl ether	MCM-Boosting	7.07709	0.514684
11	Ethanol	21	Ethyl acetate	MCM-Boosting	3.8012	0.631602
11	Ethanol	25	Ethylbenzene	MCM-Boosting	2.66879	11.3012
11	Ethanol	26	Bromobenzene	MCM-Boosting	1.76454	0.531821
11	Ethanol	27	Chlorobenzene	MCM-Boosting	2.13547	0.840639
11	Ethanol	30	Nitrobenzene	MCM-Boosting	0.916718	1.03023
11	Ethanol	31	Benzene	MCM-Boosting	2.82232	0.192776
11	Ethanol	39	1-Butanol	MCM-Boosting	0.630879	0.689603
11	Ethanol	40	2-Butanone	MCM-Boosting	4.07931	0.981699
11	Ethanol	46	Butyl chloride	MCM-Boosting	4.00184	0.680552
11	Ethanol	47	Chloroform	MCM-Boosting	3.19491	0.191176
11	Ethanol	50	Cyclohexane	MCM-Boosting	1.93294	0.486427
11	Ethanol	60	Decane	MCM-Boosting	2.18891	0.937961
11	Ethanol	72	N,N-Dimethylformamide (DMF)	MCM-Boosting	1.93559	0.625227
11	Ethanol	78	Dodecane	MCM-Boosting	1.42031	0.775336
11	Ethanol	80	Butyl acetate	MCM-Boosting	2.58264	0.371984
11	Ethanol	89	Hexane	MCM-Boosting	5.47152	0.116974
11	Ethanol	91	Heptane	MCM-Boosting	4.31241	0.0687083
11	Ethanol	97	2,2,4-Trimethylpentane	MCM-Boosting	3.59408	0.655348
11	Ethanol	110	Methanol	MCM-Boosting	2.46877	0.329459
11	Ethanol	112	3-Methylpentane	MCM-Boosting	5.99884	1.82056
11	Ethanol	140	1-Propanol	MCM-Boosting	0.77452	0.419573
11	Ethanol	157	Tetrachloromethane	MCM-Boosting	2.07308	0.119958
11	Ethanol	161	Toluene	MCM-Boosting	3.21926	0.243978
11	Ethanol	174	Water	MCM-Boosting	1.22891	0.152978
11	Ethanol	250	Cyclohexanone	MCM-Boosting	0.960227	4.52659
11	Ethanol	282	1,2-Propanediol	MCM-Boosting	0.0371197	0.573924
11	Ethanol	284	N-Methyl-2-pyrrolidone	MCM-Boosting	0.897213	0.228318
11	Ethanol	297	Hexafluorobenzene	MCM-Boosting	2.25086	0.249994
11	Ethanol	367	2,3-Dimethylbutane	MCM-Boosting	4.67945	1.84988
11	Ethanol	430	Methyl isopropyl ketone	MCM-Boosting	2.98339	0.505669
11	Ethanol	451	Carbonic acid dimethyl ester	MCM-Boosting	2.77397	0.61047
11	Ethanol	516	Hexadecane	MCM-Boosting	0.646805	1.33696
11	Ethanol	887	Deuterium oxide <Heavy water>	MCM-Boosting	1.07707	0.152064
11	Ethanol	982	Perdeuteromethanol	MCM-Boosting	2.34002	0.247874
11	Ethanol	1090	2,2-Dimethylpentane	MCM-Boosting	3.63183	3.21476
11	Ethanol	3410	1,3,5-Triisopropylbenzene	MCM-Boosting	0.611007	0.615985
11	Ethanol	4331	Hexamethyltetracosane	MCM-Boosting	0.0863142	7.8317
11	Ethanol	16447	1-Ethyl-3-methylimidazolium bis(trifluoromethylsulfonyl)imide	MCM-Boosting	0.0614877	1.80445
11	Ethanol	16583	1-Butyl-3-methylimidazolium bis(trifluoromethylsulfonyl)imide	MCM-Boosting	0.0502083	2.13497
11	Ethanol	16810	1-Octyl-3-methylimidazolium tetrafluoroborate	MCM-Boosting	0.00654825	5.25467
11	Ethanol	18162	1-Hexyl-3-methylimidazolium bis(trifluoromethylsulfonyl)imide	MCM-Boosting	0.0399645	1.13165
11	Ethanol	18174	1-Hexyl-3-methylimidazolium tetrafluoroborate	MCM-Boosting	0.00755767	4.22211
11	Ethanol	18642	1-Ethyl-3-methylimidazolium bis(pentafluoroethylsulfonyl)imide	MCM-Boosting	0.0431535	1.0134
11	Ethanol	18988	1-Ethyl-3-methylimidazolium trifluoromethylsulfonate	MCM-Boosting	0.0538696	1.31522
11	Ethanol	20138	1-Butyl-3-methylimidazolium dicyanamide	MCM-Boosting	0.0590984	15.6047
11	Ethanol	22417	1-Ethyl-3-methylimidazolium trifluoroacetate	MCM-Boosting	0.071512	0.788371
11	Ethanol	22674	1-Butyl-3-methylpyridinium tetrafluoroborate	MCM-Boosting	0.012142	2.66993
12	Diethyl ether	3	Acetonitrile	MCM-Boosting	3.07287	0.21858
12	Diethyl ether	4	Acetone	MCM-Boosting	3.65397	0.334833
12	Diethyl ether	11	Ethanol	MCM-Boosting	0.987537	0.339496
12	Diethyl ether	12	Diethyl ether	MCM-Boosting	5.31255	0.553471
12	Diethyl ether	21	Ethyl acetate	MCM-Boosting	3.00504	0.525088
12	Diethyl ether	25	Ethylbenzene	MCM-Boosting	2.07986	1.51181
12	Diethyl ether	26	Bromobenzene	MCM-Boosting	1.29888	0.545561
12	Diethyl ether	27	Chlorobenzene	MCM-Boosting	1.77695	0.613635
12	Diethyl ether	30	Nitrobenzene	MCM-Boosting	0.746904	0.698058
12	Diethyl ether	31	Benzene	MCM-Boosting	1.99668	0.258719
12	Diethyl ether	39	1-Butanol	MCM-Boosting	0.444961	0.721628
12	Diethyl ether	40	2-Butanone	MCM-Boosting	2.89615	0.868874
12	Diethyl ether	46	Butyl chloride	MCM-Boosting	2.97405	0.501354
12	Diethyl ether	47	Chloroform	MCM-Boosting	2.48424	0.202903
12	Diethyl ether	50	Cyclohexane	MCM-Boosting	1.30852	0.521828
12	Diethyl ether	60	Decane	MCM-Boosting	1.57092	0.952223
12	Diethyl ether	72	N,N-Dimethylformamide (DMF)	MCM-Boosting	1.45063	1.04769
12	Diethyl ether	78	Dodecane	MCM-Boosting	1.12099	0.541763
12	Diethyl ether	80	Butyl acetate	MCM-Boosting	1.8955	0.363021
12	Diethyl ether	89	Hexane	MCM-Boosting	4.21936	0.10951
12	Diethyl ether	91	Heptane	MCM-Boosting	3.28951	0.0604943
12	Diethyl ether	97	2,2,4-Trimethylpentane	MCM-Boosting	2.8163	0.640085
12	Diethyl ether	110	Methanol	MCM-Boosting	1.85306	0.286563
12	Diethyl ether	112	3-Methylpentane	MCM-Boosting	4.28713	3.14162
12	Diethyl ether	140	1-Propanol	MCM-Boosting	0.573691	0.368774
12	Diethyl ether	157	Tetrachloromethane	MCM-Boosting	1.55671	0.122735
12	Diethyl ether	161	Toluene	MCM-Boosting	2.20751	0.333137
12	Diethyl ether	174	Water	MCM-Boosting	1.0402	0.185526
12	Diethyl ether	250	Cyclohexanone	MCM-Boosting	0.601031	1.98263
12	Diethyl ether	282	1,2-Propanediol	MCM-Boosting	0.0290345	0.577742
12	Diethyl ether	284	N-Methyl-2-pyrrolidone	MCM-Boosting	0.668561	0.242366
12	Diethyl ether	297	Hexafluorobenzene	MCM-Boosting	1.69172	0.264935
12	Diethyl ether	367	2,3-Dimethylbutane	MCM-Boosting	3.46617	2.33006
12	Diethyl ether	430	Methyl isopropyl ketone	MCM-Boosting	2.30665	0.450031
12	Diethyl ether	451	Carbonic acid dimethyl ester	MCM-Boosting	2.15183	0.496024
12	Diethyl ether	516	Hexadecane	MCM-Boosting	0.553808	0.796015
12	Diethyl ether	887	Deuterium oxide <Heavy water>	MCM-Boosting	0.863377	0.121811
12	Diethyl ether	982	Perdeuteromethanol	MCM-Boosting	1.70008	0.307824
12	Diethyl ether	1090	2,2-Dimethylpentane	MCM-Boosting	2.63664	3.2762
12	Diethyl ether	3410	1,3,5-Triisopropylbenzene	MCM-Boosting	0.433803	0.530177
12	Diethyl ether	4331	Hexamethyltetracosane	MCM-Boosting	0.0736933	2.97457
12	Diethyl ether	16447	1-Ethyl-3-methylimidazolium bis(trifluoromethylsulfonyl)imide	MCM-Boosting	0.0431638	1.15608
12	Diethyl ether	16583	1-Butyl-3-methylimidazolium bis(trifluoromethylsulfonyl)imide	MCM-Boosting	0.0398986	4.68355
12	Diethyl ether	16810	1-Octyl-3-methylimidazolium tetrafluoroborate	MCM-Boosting	0.00436565	3.18023
12	Diethyl ether	18162	1-Hexyl-3-methylimidazolium bis(trifluoromethylsulfonyl)imide	MCM-Boosting	0.0273556	0.97842
12	Diethyl ether	18174	1-Hexyl-3-methylimidazolium tetrafluoroborate	MCM-Boosting	0.00490068	8.80777
12	Diethyl ether	18642	1-Ethyl-3-methylimidazolium bis(pentafluoroethylsulfonyl)imide	MCM-Boosting	0.029553	1.04209
12	Diethyl ether	18988	1-Ethyl-3-methylimidazolium trifluoromethylsulfonate	MCM-Boosting	0.0380504	1.40152
12	Diethyl ether	20138	1-Butyl-3-methylimidazolium dicyanamide	MCM-Boosting	0.0522928	9.58211
12	Diethyl ether	22417	1-Ethyl-3-methylimidazolium trifluoroacetate	MCM-Boosting	0.0520235	0.878365
12	Diethyl ether	22674	1-Butyl-3-methylpyridinium tetrafluoroborate	MCM-Boosting	0.00818169	1.98046
15	Formic acid	3	Acetonitrile	MCM-Boosting	4.0872	0.266076
15	Formic acid	4	Acetone	MCM-Boosting	5.02703	0.476771
15	Formic acid	11	Ethanol	MCM-Boosting	1.34225	0.54345
15	Formic acid	12	Diethyl ether	MCM-Boosting	6.91792	1.13299
15	Formic acid	21	Ethyl acetate	MCM-Boosting	3.72611	1.05507
15	Formic acid	25	Ethylbenzene	MCM-Boosting	2.58801	5.55355
15	Formic acid	26	Bromobenzene	MCM-Boosting	1.8191	1.07829
15	Formic acid	27	Chlorobenzene	MCM-Boosting	2.5874	0.921625
15	Formic acid	30	Nitrobenzene	MCM-Boosting	0.90678	1.78227
15	Formic acid	31	Benzene	MCM-Boosting	2.43844	0.28932
15	Formic acid	39	1-Butanol	MCM-Boosting	0.633751	1.11429
15	Formic acid	40	2-Butanone	MCM-Boosting	3.96509	1.46152
15	Formic acid	46	Butyl chloride	MCM-Boosting	3.86883	0.747514
15	Formic acid	47	Chloroform	MCM-Boosting	3.31577	0.228408
15	Formic acid	50	Cyclohexane	MCM-Boosting	1.69579	0.810954
15	Formic acid	60	Decane	MCM-Boosting	2.14	1.85047
15	Formic acid	72	N,N-Dimethylformamide (DMF)	MCM-Boosting	1.93536	0.861468
15	Formic acid	78	Dodecane	MCM-Boosting	1.38234	1.44732
15	Formic acid	80	Butyl acetate	MCM-Boosting	2.58597	0.459048
15	Formic acid	89	Hexane	MCM-Boosting	5.60855	0.153607
15	Formic acid	91	Heptane	MCM-Boosting	4.31951	0.0870624
15	Formic acid	97	2,2,4-Trimethylpentane	MCM-Boosting	3.74502	1.02581
15	Formic acid	110	Methanol	MCM-Boosting	2.48113	0.441064
15	Formic acid	112	3-Methylpentane	MCM-Boosting	5.7496	19.4178
15	Formic acid	140	1-Propanol	MCM-Boosting	0.780055	0.597405
15	Formic acid	157	Tetrachloromethane	MCM-Boosting	2.05208	0.160275
15	Formic acid	161	Toluene	MCM-Boosting	2.73239	0.447673
15	Formic acid	174	Water	MCM-Boosting	1.39405	0.18029
15	Formic acid	250	Cyclohexanone	MCM-Boosting	0.682067	8.99174
15	Formic acid	282	1,2-Propanediol	MCM-Boosting	0.0411566	0.775348
15	Formic acid	284	N-Methyl-2-pyrrolidone	MCM-Boosting	0.883486	0.331867
15	Formic acid	297	Hexafluorobenzene	MCM-Boosting	2.21695	0.433822
15	Formic acid	367	2,3-Dimethylbutane	MCM-Boosting	4.35639	7.95398
15	Formic acid	430	Methyl isopropyl ketone	MCM-Boosting	3.20213	0.581963
15	Formic acid	451	Carbonic acid dimethyl ester	MCM-Boosting	2.83362	1.18774
15	Formic acid	516	Hexadecane	MCM-Boosting	0.670908	3.05731
15	Formic acid	887	Deuterium oxide <Heavy water>	MCM-Boosting	1.07732	0.226207
15	Formic acid	982	Perdeuteromethanol	MCM-Boosting	2.07542	0.377528
15	Formic acid	1090	2,2-Dimethylpentane	MCM-Boosting	3.49512	30.5819
15	Formic acid	3410	1,3,5-Triisopropylbenzene	MCM-Boosting	0.513017	1.52073
15	Formic acid	4331	Hexamethyltetracosane	MCM-Boosting	0.0795843	33.9826
15	Formic acid	16447	1-Ethyl-3-methylimidazolium bis(trifluoromethylsulfonyl)imide	MCM-Boosting	0.0631884	2.31076
15	Formic acid	16583	1-Butyl-3-methylimidazolium bis(trifluoromethylsulfonyl)imide	MCM-Boosting	0.0445202	6.30981
15	Formic acid	16810	1-Octyl-3-methylimidazolium tetrafluoroborate	MCM-Boosting	0.00718572	10.22
15	Formic acid	18162	1-Hexyl-3-methylimidazolium bis(trifluoromethylsulfonyl)imide	MCM-Boosting	0.0406004	1.94315
15	Formic acid	18174	1-Hexyl-3-methylimidazolium tetrafluoroborate	MCM-Boosting	0.007643	9.48469
15	Formic acid	18642	1-Ethyl-3-methylimidazolium bis(pentafluoroethylsulfonyl)imide	MCM-Boosting	0.0434123	1.63175
15	Formic acid	18988	1-Ethyl-3-methylimidazolium trifluoromethylsulfonate	MCM-Boosting	0.0586058	1.75229
15	Formic acid	20138	1-Butyl-3-methylimidazolium dicyanamide	MCM-Boosting	0.0542432	159.683
15	Formic acid	22417	1-Ethyl-3-methylimidazolium trifluoroacetate	MCM-Boosting	0.0747389	1.17158
15	Formic acid	22674	1-Butyl-3-methylpyridinium tetrafluoroborate	MCM-Boosting	0.012994	4.97597
17	Aniline	3	Acetonitrile	MCM-Boosting	2.8098	0.247508
17	Aniline	4	Acetone	MCM-Boosting	3.33783	0.436812
17	Aniline	11	Ethanol	MCM-Boosting	0.916263	0.473092
17	Aniline	12	Diethyl ether	MCM-Boosting	4.70634	1.05814
17	Aniline	21	Ethyl acetate	MCM-Boosting	2.55621	1.03047
17	Aniline	25	Ethylbenzene	MCM-Boosting	1.69536	11.1278
17	Aniline	26	Bromobenzene	MCM-Boosting	1.17737	0.761405
17	Aniline	27	Chlorobenzene	MCM-Boosting	1.69734	0.823872
17	Aniline	30	Nitrobenzene	MCM-Boosting	0.603007	1.35679
17	Aniline	31	Benzene	MCM-Boosting	1.68812	0.303706
17	Aniline	39	1-Butanol	MCM-Boosting	0.418711	0.913943
17	Aniline	40	2-Butanone	MCM-Boosting	2.62036	1.25668
17	Aniline	46	Butyl chloride	MCM-Boosting	2.54981	0.648435
17	Aniline	47	Chloroform	MCM-Boosting	2.2176	0.220895
17	Aniline	50	Cyclohexane	MCM-Boosting	1.17082	0.680578
17	Aniline	60	Decane	MCM-Boosting	1.44392	3.20406
17	Aniline	72	N,N-Dimethylformamide (DMF)	MCM-Boosting	1.29911	1.35166
17	Aniline	78	Dodecane	MCM-Boosting	0.930146	1.01922
17	Aniline	80	Butyl acetate	MCM-Boosting	1.71316	0.484355
17	Aniline	89	Hexane	MCM-Boosting	3.73783	0.135586
17	Aniline	91	Heptane	MCM-Boosting	2.91361	0.0803201
17	Aniline	97	2,2,4-Trimethylpentane	MCM-Boosting	2.46532	0.93201
17	Aniline	110	Methanol	MCM-Boosting	1.71072	0.396384
17	Aniline	112	3-Methylpentane	MCM-Boosting	3.88636	7.02729
17	Aniline	140	1-Propanol	MCM-Boosting	0.530787	0.50622
17	Aniline	157	Tetrachloromethane	MCM-Boosting	1.37966	0.14703
17	Aniline	161	Toluene	MCM-Boosting	1.8624	0.399401
17	Aniline	174	Water	MCM-Boosting	0.966215	0.178865
17	Aniline	250	Cyclohexanone	MCM-Boosting	0.50232	24.257
17	Aniline	282	1,2-Propanediol	MCM-Boosting	0.02777	0.695832
17	Aniline	284	N-Methyl-2-pyrrolidone	MCM-Boosting	0.586878	0.305224
17	Aniline	297	Hexafluorobenzene	MCM-Boosting	1.45809	0.312953
17	Aniline	367	2,3-Dimethylbutane	MCM-Boosting	2.87672	3.54904
17	Aniline	430	Methyl isopropyl ketone	MCM-Boosting	2.09548	0.577668
17	Aniline	451	Carbonic acid dimethyl ester	MCM-Boosting	1.90161	1.30013
17	Aniline	516	Hexadecane	MCM-Boosting	0.450047	1.93968
17	Aniline	887	Deuterium oxide <Heavy water>	MCM-Boosting	0.77266	0.182573
17	Aniline	982	Perdeuteromethanol	MCM-Boosting	1.45935	0.380895
17	Aniline	1090	2,2-Dimethylpentane	MCM-Boosting	2.36599	11.8521
17	Aniline	3410	1,3,5-Triisopropylbenzene	MCM-Boosting	0.356061	1.31614
17	Aniline	4331	Hexamethyltetracosane	MCM-Boosting	0.0534122	22.3242
17	Aniline	16447	1-Ethyl-3-methylimidazolium bis(trifluoromethylsulfonyl)imide	MCM-Boosting	0.0396058	2.03969
17	Aniline	16583	1-Butyl-3-methylimidazolium bis(trifluoromethylsulfonyl)imide	MCM-Boosting	0.031598	4.43906
17	Aniline	16810	1-Octyl-3-methylimidazolium tetrafluoroborate	MCM-Boosting	0.00447331	7.66777
17	Aniline	18162	1-Hexyl-3-methylimidazolium bis(trifluoromethylsulfonyl)imide	MCM-Boosting	0.0259921	1.56051
17	Aniline	18174	1-Hexyl-3-methylimidazolium tetrafluoroborate	MCM-Boosting	0.00497661	16.8605
17	Aniline	18642	1-Ethyl-3-methylimidazolium bis(pentafluoroethylsulfonyl)imide	MCM-Boosting	0.0275606	2.69361
17	Aniline	18988	1-Ethyl-3-methylimidazolium trifluoromethylsulfonate	MCM-Boosting	0.0367583	1.82906
17	Aniline	20138	1-Butyl-3-methylimidazolium dicyanamide	MCM-Boosting	0.038103	55.2748
17	Aniline	22417	1-Ethyl-3-methylimidazolium trifluoroacetate	MCM-Boosting	0.0491258	1.16515
17	Aniline	22674	1-Butyl-3-methylpyridinium tetrafluoroborate	MCM-Boosting	0.00826166	3.79755
21	Ethyl acetate	3	Acetonitrile	MCM-Boosting	2.63382	0.442265
21	Ethyl acetate	4	Acetone	MCM-Boosting	3.45094	0.479903
21	Ethyl acetate	11	Ethanol	MCM-Boosting	0.978804	0.432503
21	Ethyl acetate	12	Diethyl ether	MCM-Boosting	4.94624	1.1716
21	Ethyl acetate	21	Ethyl acetate	MCM-Boosting	2.51219	1.90971
21	Ethyl acetate	25	Ethylbenzene	MCM-Boosting	2.35107	7.82408
21	Ethyl acetate	26	Bromobenzene	MCM-Boosting	1.19533	1.0663
21	Ethyl acetate	27	Chlorobenzene	MCM-Boosting	1.02608	1.6012
21	Ethyl acetate	30	Nitrobenzene	MCM-Boosting	0.654456	3.02066
21	Ethyl acetate	31	Benzene	MCM-Boosting	2.86566	0.179342
21	Ethyl acetate	39	1-Butanol	MCM-Boosting	0.515061	0.947226
21	Ethyl acetate	40	2-Butanone	MCM-Boosting	3.64359	1.32639
21	Ethyl acetate	46	Butyl chloride	MCM-Boosting	2.95936	1.19296
21	Ethyl acetate	47	Chloroform	MCM-Boosting	1.99181	0.429996
21	Ethyl acetate	50	Cyclohexane	MCM-Boosting	2.02738	0.384353
21	Ethyl acetate	60	Decane	MCM-Boosting	1.57196	4.57709
21	Ethyl acetate	72	N,N-Dimethylformamide (DMF)	MCM-Boosting	1.4181	3.375
21	Ethyl acetate	78	Dodecane	MCM-Boosting	0.941288	1.30909
21	Ethyl acetate	80	Butyl acetate	MCM-Boosting	1.9471	0.675755
21	Ethyl acetate	89	Hexane	MCM-Boosting	3.7317	0.15416
21	Ethyl acetate	91	Heptane	MCM-Boosting	3.03098	0.0974149
21	Ethyl acetate	97	2,2,4-Trimethylpentane	MCM-Boosting	2.36462	1.44651
21	Ethyl acetate	110	Methanol	MCM-Boosting	1.88903	0.35708
21	Ethyl acetate	112	3-Methylpentane	MCM-Boosting	3.78377	8.30726
21	Ethyl acetate	140	1-Propanol	MCM-Boosting	0.582817	0.464002
21	Ethyl acetate	157	Tetrachloromethane	MCM-Boosting	1.48837	0.175489
21	Ethyl acetate	161	Toluene	MCM-Boosting	3.43593	0.209537
21	Ethyl acetate	174	Water	MCM-Boosting	0.661453	0.250628
21	Ethyl acetate	250	Cyclohexanone	MCM-Boosting	1.25505	3.76447
21	Ethyl acetate	282	1,2-Propanediol	MCM-Boosting	0.0234	1.10156
21	Ethyl acetate	284	N-Methyl-2-pyrrolidone	MCM-Boosting	0.661997	0.450223
21	Ethyl acetate	297	Hexafluorobenzene	MCM-Boosting	1.54099	0.540494
21	Ethyl acetate	367	2,3-Dimethylbutane	MCM-Boosting	3.58194	4.8235
21	Ethyl acetate	430	Methyl isopropyl ketone	MCM-Boosting	1.88895	1.13682
21	Ethyl acetate	451	Carbonic acid dimethyl ester	MCM-Boosting	1.91606	0.858434
21	Ethyl acetate	516	Hexadecane	MCM-Boosting	0.347309	2.47909
21	Ethyl acetate	887	Deuterium oxide <Heavy water>	MCM-Boosting	0.760994	0.246508
21	Ethyl acetate	982	Perdeuteromethanol	MCM-Boosting	2.33601	0.222492
21	Ethyl acetate	1090	2,2-Dimethylpentane	MCM-Boosting	3.06313	59.9241
21	Ethyl acetate	3410	1,3,5-Triisopropylbenzene	MCM-Boosting	0.598794	0.756145
21	Ethyl acetate	4331	Hexamethyltetracosane	MCM-Boosting	0.0479097	24.9103
21	Ethyl acetate	16447	1-Ethyl-3-methylimidazolium bis(trifluoromethylsulfonyl)imide	MCM-Boosting	0.046262	5.46729
21	Ethyl acetate	16583	1-Butyl-3-methylimidazolium bis(trifluoromethylsulfonyl)imide	MCM-Boosting	0.0355901	5.48022
21	Ethyl acetate	16810	1-Octyl-3-methylimidazolium tetrafluoroborate	MCM-Boosting	0.00529914	25.3168
21	Ethyl acetate	18162	1-Hexyl-3-methylimidazolium bis(trifluoromethylsulfonyl)imide	MCM-Boosting	0.0312877	1.30333
21	Ethyl acetate	18174	1-Hexyl-3-methylimidazolium tetrafluoroborate	MCM-Boosting	0.00667332	8.62393
21	Ethyl acetate	18642	1-Ethyl-3-methylimidazolium bis(pentafluoroethylsulfonyl)imide	MCM-Boosting	0.0335782	7.33652
21	Ethyl acetate	18988	1-Ethyl-3-methylimidazolium trifluoromethylsulfonate	MCM-Boosting	0.0374616	5.65202
21	Ethyl acetate	20138	1-Butyl-3-methylimidazolium dicyanamide	MCM-Boosting	0.0314595	51.1638
21	Ethyl acetate	22417	1-Ethyl-3-methylimidazolium trifluoroacetate	MCM-Boosting	0.0496262	3.10712
21	Ethyl acetate	22674	1-Butyl-3-methylpyridinium tetrafluoroborate	MCM-Boosting	0.00957077	14.8719
24	Benzyl alcohol	3	Acetonitrile	MCM-Boosting	2.52963	0.158026
24	Benzyl alcohol	4	Acetone	MCM-Boosting	3.10945	0.146318
24	Benzyl alcohol	11	Ethanol	MCM-Boosting	0.855509	0.115999
24	Benzyl alcohol	12	Diethyl ether	MCM-Boosting	4.41618	0.336897
24	Benzyl alcohol	21	Ethyl acetate	MCM-Boosting	2.28639	0.441464
24	Benzyl alcohol	25	Ethylbenzene	MCM-Boosting	1.71114	0.815488
24	Benzyl alcohol	26	Bromobenzene	MCM-Boosting	1.08799	0.256374
24	Benzyl alcohol	27	Chlorobenzene	MCM-Boosting	1.33543	0.363124
24	Benzyl alcohol	30	Nitrobenzene	MCM-Boosting	0.569412	0.517344
24	Benzyl alcohol	31	Benzene	MCM-Boosting	1.77536	0.205906
24	Benzyl alcohol	39	1-Butanol	MCM-Boosting	0.402474	0.259521
24	Benzyl alcohol	40	2-Butanone	MCM-Boosting	2.60599	0.389367
24	Benzyl alcohol	46	Butyl chloride	MCM-Boosting	2.4303	0.296312
24	Benzyl alcohol	47	Chloroform	MCM-Boosting	1.96896	0.175061
24	Benzyl alcohol	50	Cyclohexane	MCM-Boosting	1.23602	0.237278
24	Benzyl alcohol	60	Decane	MCM-Boosting	1.38339	0.689055
24	Benzyl alcohol	72	N,N-Dimethylformamide (DMF)	MCM-Boosting	1.22098	0.626246
24	Benzyl alcohol	78	Dodecane	MCM-Boosting	0.835384	0.265291
24	Benzyl alcohol	80	Butyl acetate	MCM-Boosting	1.63237	0.240263
24	Benzyl alcohol	89	Hexane	MCM-Boosting	3.42993	0.0606279
24	Benzyl alcohol	91	Heptane	MCM-Boosting	2.68864	0.0373761
24	Benzyl alcohol	97	2,2,4-Trimethylpentane	MCM-Boosting	2.23295	0.363852
24	Benzyl alcohol	110	Methanol	MCM-Boosting	1.6177	0.097545
24	Benzyl alcohol	112	3-Methylpentane	MCM-Boosting	3.54486	0.791769
24	Benzyl alcohol	140	1-Propanol	MCM-Boosting	0.498891	0.126465
24	Benzyl alcohol	157	Tetrachloromethane	MCM-Boosting	1.27669	0.0689679
24	Benzyl alcohol	161	Toluene	MCM-Boosting	2.0157	0.24313
24	Benzyl alcohol	174	Water	MCM-Boosting	0.81186	0.181483
24	Benzyl alcohol	250	Cyclohexanone	MCM-Boosting	0.584718	0.608021
24	Benzyl alcohol	282	1,2-Propanediol	MCM-Boosting	0.0241971	0.270372
24	Benzyl alcohol	284	N-Methyl-2-pyrrolidone	MCM-Boosting	0.560747	0.190599
24	Benzyl alcohol	297	Hexafluorobenzene	MCM-Boosting	1.36804	0.209181
24	Benzyl alcohol	367	2,3-Dimethylbutane	MCM-Boosting	2.95429	0.45955
24	Benzyl alcohol	430	Methyl isopropyl ketone	MCM-Boosting	1.90712	0.30435
24	Benzyl alcohol	451	Carbonic acid dimethyl ester	MCM-Boosting	1.75077	0.265469
24	Benzyl alcohol	516	Hexadecane	MCM-Boosting	0.382775	0.368588
24	Benzyl alcohol	887	Deuterium oxide <Heavy water>	MCM-Boosting	0.709996	0.0773783
24	Benzyl alcohol	982	Perdeuteromethanol	MCM-Boosting	1.53598	0.188614
24	Benzyl alcohol	1090	2,2-Dimethylpentane	MCM-Boosting	2.28372	0.711456
24	Benzyl alcohol	3410	1,3,5-Triisopropylbenzene	MCM-Boosting	0.378409	0.24004
24	Benzyl alcohol	4331	Hexamethyltetracosane	MCM-Boosting	0.0484499	1.10654
24	Benzyl alcohol	16447	1-Ethyl-3-methylimidazolium bis(trifluoromethylsulfonyl)imide	MCM-Boosting	0.0385008	0.555304
24	Benzyl alcohol	16583	1-Butyl-3-methylimidazolium bis(trifluoromethylsulfonyl)imide	MCM-Boosting	0.029062	0.912424
24	Benzyl alcohol	16810	1-Octyl-3-methylimidazolium tetrafluoroborate	MCM-Boosting	0.00416595	0.776416
24	Benzyl alcohol	18162	1-Hexyl-3-methylimidazolium bis(trifluoromethylsulfonyl)imide	MCM-Boosting	0.0248995	0.291377
24	Benzyl alcohol	18174	1-Hexyl-3-methylimidazolium tetrafluoroborate	MCM-Boosting	0.00481611	3.21064
24	Benzyl alcohol	18642	1-Ethyl-3-methylimidazolium bis(pentafluoroethylsulfonyl)imide	MCM-Boosting	0.0261324	0.640975
24	Benzyl alcohol	18988	1-Ethyl-3-methylimidazolium trifluoromethylsulfonate	MCM-Boosting	0.033078	0.636739
24	Benzyl alcohol	20138	1-Butyl-3-methylimidazolium dicyanamide	MCM-Boosting	0.032729	1.2364
24	Benzyl alcohol	22417	1-Ethyl-3-methylimidazolium trifluoroacetate	MCM-Boosting	0.0444394	0.480777
24	Benzyl alcohol	22674	1-Butyl-3-methylpyridinium tetrafluoroborate	MCM-Boosting	0.00784733	0.60823
25	Ethylbenzene	3	Acetonitrile	MCM-Boosting	2.66287	0.337084
25	Ethylbenzene	4	Acetone	MCM-Boosting	3.34287	0.37545
25	Ethylbenzene	11	Ethanol	MCM-Boosting	0.924546	0.342979
25	Ethylbenzene	12	Diethyl ether	MCM-Boosting	4.52831	0.800944
25	Ethylbenzene	21	Ethyl acetate	MCM-Boosting	2.15402	1.31725
25	Ethylbenzene	25	Ethylbenzene	MCM-Boosting	1.72398	10.9756
25	Ethylbenzene	26	Bromobenzene	MCM-Boosting	1.15493	0.752341
25	Ethylbenzene	27	Chlorobenzene	MCM-Boosting	1.57844	0.904967
25	Ethylbenzene	30	Nitrobenzene	MCM-Boosting	0.525494	2.82145
25	Ethylbenzene	31	Benzene	MCM-Boosting	1.64204	0.540009
25	Ethylbenzene	39	1-Butanol	MCM-Boosting	0.443457	0.906521
25	Ethylbenzene	40	2-Butanone	MCM-Boosting	2.83799	1.271
25	Ethylbenzene	46	Butyl chloride	MCM-Boosting	2.47203	0.888345
25	Ethylbenzene	47	Chloroform	MCM-Boosting	2.0561	0.372141
25	Ethylbenzene	50	Cyclohexane	MCM-Boosting	1.21403	0.723661
25	Ethylbenzene	60	Decane	MCM-Boosting	1.54887	2.28254
25	Ethylbenzene	72	N,N-Dimethylformamide (DMF)	MCM-Boosting	1.32287	11.5692
25	Ethylbenzene	78	Dodecane	MCM-Boosting	0.780329	0.981442
25	Ethylbenzene	80	Butyl acetate	MCM-Boosting	1.68724	0.565097
25	Ethylbenzene	89	Hexane	MCM-Boosting	3.56706	0.133285
25	Ethylbenzene	91	Heptane	MCM-Boosting	2.73253	0.0786489
25	Ethylbenzene	97	2,2,4-Trimethylpentane	MCM-Boosting	2.22083	1.4971
25	Ethylbenzene	110	Methanol	MCM-Boosting	1.71808	0.281647
25	Ethylbenzene	112	3-Methylpentane	MCM-Boosting	3.46392	3.90841
25	Ethylbenzene	140	1-Propanol	MCM-Boosting	0.541392	0.36672
25	Ethylbenzene	157	Tetrachloromethane	MCM-Boosting	1.30142	0.154047
25	Ethylbenzene	161	Toluene	MCM-Boosting	1.83548	0.64668
25	Ethylbenzene	174	Water	MCM-Boosting	0.892029	0.352391
25	Ethylbenzene	250	Cyclohexanone	MCM-Boosting	0.559874	7.21074
25	Ethylbenzene	282	1,2-Propanediol	MCM-Boosting	0.0281173	0.6346
25	Ethylbenzene	284	N-Methyl-2-pyrrolidone	MCM-Boosting	0.5795	0.437235
25	Ethylbenzene	297	Hexafluorobenzene	MCM-Boosting	1.35833	0.449881
25	Ethylbenzene	367	2,3-Dimethylbutane	MCM-Boosting	2.78473	2.95246
25	Ethylbenzene	430	Methyl isopropyl ketone	MCM-Boosting	2.12359	0.687798
25	Ethylbenzene	451	Carbonic acid dimethyl ester	MCM-Boosting	1.81724	0.830748
25	Ethylbenzene	516	Hexadecane	MCM-Boosting	0.341395	1.47045
25	Ethylbenzene	887	Deuterium oxide <Heavy water>	MCM-Boosting	0.71407	0.195501
25	Ethylbenzene	982	Perdeuteromethanol	MCM-Boosting	1.42265	0.476698
25	Ethylbenzene	1090	2,2-Dimethylpentane	MCM-Boosting	2.17743	4.93831
25	Ethylbenzene	3410	1,3,5-Triisopropylbenzene	MCM-Boosting	0.340078	0.961197
25	Ethylbenzene	4331	Hexamethyltetracosane	MCM-Boosting	0.0379409	24.056
25	Ethylbenzene	16447	1-Ethyl-3-methylimidazolium bis(trifluoromethylsulfonyl)imide	MCM-Boosting	0.0440034	10.4434
25	Ethylbenzene	16583	1-Butyl-3-methylimidazolium bis(trifluoromethylsulfonyl)imide	MCM-Boosting	0.0243909	24.5647
25	Ethylbenzene	16810	1-Octyl-3-methylimidazolium tetrafluoroborate	MCM-Boosting	0.00548638	8.62883
25	Ethylbenzene	18162	1-Hexyl-3-methylimidazolium bis(trifluoromethylsulfonyl)imide	MCM-Boosting	0.0284468	0.991173
25	Ethylbenzene	18174	1-Hexyl-3-methylimidazolium tetrafluoroborate	MCM-Boosting	0.00574526	34.7318
25	Ethylbenzene	18642	1-Ethyl-3-methylimidazolium bis(pentafluoroethylsulfonyl)imide	MCM-Boosting	0.0291562	3.01815
25	Ethylbenzene	18988	1-Ethyl-3-methylimidazolium trifluoromethylsulfonate	MCM-Boosting	0.040383	5.34661
25	Ethylbenzene	20138	1-Butyl-3-methylimidazolium dicyanamide	MCM-Boosting	0.0242523	20.8642
25	Ethylbenzene	22417	1-Ethyl-3-methylimidazolium trifluoroacetate	MCM-Boosting	0.0499492	2.90891
25	Ethylbenzene	22674	1-Butyl-3-methylpyridinium tetrafluoroborate	MCM-Boosting	0.00956715	2.58951
26	Bromobenzene	3	Acetonitrile	MCM-Boosting	2.17165	0.185801
26	Bromobenzene	4	Acetone	MCM-Boosting	2.56422	0.231308
26	Bromobenzene	11	Ethanol	MCM-Boosting	0.693854	0.227441
26	Bromobenzene	12	Diethyl ether	MCM-Boosting	3.52797	0.544894
26	Bromobenzene	21	Ethyl acetate	MCM-Boosting	1.93473	0.447661
26	Bromobenzene	25	Ethylbenzene	MCM-Boosting	1.28601	1.13444
26	Bromobenzene	26	Bromobenzene	MCM-Boosting	0.871876	0.390019
26	Bromobenzene	27	Chlorobenzene	MCM-Boosting	1.3855	0.329645
26	Bromobenzene	30	Nitrobenzene	MCM-Boosting	0.4567	0.575835
26	Bromobenzene	31	Benzene	MCM-Boosting	1.16126	0.261523
26	Bromobenzene	39	1-Butanol	MCM-Boosting	0.307281	0.470481
26	Bromobenzene	40	2-Butanone	MCM-Boosting	1.90887	0.658473
26	Bromobenzene	46	Butyl chloride	MCM-Boosting	1.90607	0.402531
26	Bromobenzene	47	Chloroform	MCM-Boosting	1.7287	0.156927
26	Bromobenzene	50	Cyclohexane	MCM-Boosting	0.794051	0.396661
26	Bromobenzene	60	Decane	MCM-Boosting	1.07269	0.89472
26	Bromobenzene	72	N,N-Dimethylformamide (DMF)	MCM-Boosting	0.965173	0.961451
26	Bromobenzene	78	Dodecane	MCM-Boosting	0.697957	0.408412
26	Bromobenzene	80	Butyl acetate	MCM-Boosting	1.27545	0.338278
26	Bromobenzene	89	Hexane	MCM-Boosting	2.87689	0.0788904
26	Bromobenzene	91	Heptane	MCM-Boosting	2.19153	0.0491607
26	Bromobenzene	97	2,2,4-Trimethylpentane	MCM-Boosting	1.88316	0.411316
26	Bromobenzene	110	Methanol	MCM-Boosting	1.30388	0.195217
26	Bromobenzene	112	3-Methylpentane	MCM-Boosting	2.99797	0.770293
26	Bromobenzene	140	1-Propanol	MCM-Boosting	0.397824	0.243772
26	Bromobenzene	157	Tetrachloromethane	MCM-Boosting	1.02042	0.0941197
26	Bromobenzene	161	Toluene	MCM-Boosting	1.2765	0.294886
26	Bromobenzene	174	Water	MCM-Boosting	0.820162	0.128531
26	Bromobenzene	250	Cyclohexanone	MCM-Boosting	0.314044	1.58195
26	Bromobenzene	282	1,2-Propanediol	MCM-Boosting	0.0214669	0.31343
26	Bromobenzene	284	N-Methyl-2-pyrrolidone	MCM-Boosting	0.441061	0.240496
26	Bromobenzene	297	Hexafluorobenzene	MCM-Boosting	1.10921	0.275959
26	Bromobenzene	367	2,3-Dimethylbutane	MCM-Boosting	2.22944	0.861347
26	Bromobenzene	430	Methyl isopropyl ketone	MCM-Boosting	1.61491	0.354601
26	Bromobenzene	451	Carbonic acid dimethyl ester	MCM-Boosting	1.45529	0.323812
26	Bromobenzene	516	Hexadecane	MCM-Boosting	0.357307	0.540995
26	Bromobenzene	887	Deuterium oxide <Heavy water>	MCM-Boosting	0.603379	0.106313
26	Bromobenzene	982	Perdeuteromethanol	MCM-Boosting	1.04885	0.244072
26	Bromobenzene	1090	2,2-Dimethylpentane	MCM-Boosting	1.68818	1.53501
26	Bromobenzene	3410	1,3,5-Triisopropylbenzene	MCM-Boosting	0.242739	0.47398
26	Bromobenzene	4331	Hexamethyltetracosane	MCM-Boosting	0.0415644	1.80269
26	Bromobenzene	16447	1-Ethyl-3-methylimidazolium bis(trifluoromethylsulfonyl)imide	MCM-Boosting	0.0291623	0.911124
26	Bromobenzene	16583	1-Butyl-3-methylimidazolium bis(trifluoromethylsulfonyl)imide	MCM-Boosting	0.0229382	1.40856
26	Bromobenzene	16810	1-Octyl-3-methylimidazolium tetrafluoroborate	MCM-Boosting	0.00311861	2.07099
26	Bromobenzene	18162	1-Hexyl-3-methylimidazolium bis(trifluoromethylsulfonyl)imide	MCM-Boosting	0.018357	0.580444
26	Bromobenzene	18174	1-Hexyl-3-methylimidazolium tetrafluoroborate	MCM-Boosting	0.00344273	1.74021
26	Bromobenzene	18642	1-Ethyl-3-methylimidazolium bis(pentafluoroethylsulfonyl)imide	MCM-Boosting	0.0194931	0.804288
26	Bromobenzene	18988	1-Ethyl-3-methylimidazolium trifluoromethylsulfonate	MCM-Boosting	0.0267929	1.14188
26	Bromobenzene	20138	1-Butyl-3-methylimidazolium dicyanamide	MCM-Boosting	0.0309133	2.92083
26	Bromobenzene	22417	1-Ethyl-3-methylimidazolium trifluoroacetate	MCM-Boosting	0.0360949	0.741938
26	Bromobenzene	22674	1-Butyl-3-methylpyridinium tetrafluoroborate	MCM-Boosting	0.00566794	1.57062
27	Chlorobenzene	3	Acetonitrile	MCM-Boosting	2.63194	0.151548
27	Chlorobenzene	4	Acetone	MCM-Boosting	3.37261	0.176477
27	Chlorobenzene	11	Ethanol	MCM-Boosting	0.940524	0.16584
27	Chlorobenzene	12	Diethyl ether	MCM-Boosting	4.32113	0.401643
27	Chlorobenzene	21	Ethyl acetate	MCM-Boosting	2.01707	0.528085
27	Chlorobenzene	25	Ethylbenzene	MCM-Boosting	1.62988	1.56991
27	Chlorobenzene	26	Bromobenzene	MCM-Boosting	1.17156	0.276211
27	Chlorobenzene	27	Chlorobenzene	MCM-Boosting	1.50584	0.374895
27	Chlorobenzene	30	Nitrobenzene	MCM-Boosting	0.482893	0.579128
27	Chlorobenzene	31	Benzene	MCM-Boosting	1.578	0.216729
27	Chlorobenzene	39	1-Butanol	MCM-Boosting	0.455295	0.306785
27	Chlorobenzene	40	2-Butanone	MCM-Boosting	2.80284	0.458863
27	Chlorobenzene	46	Butyl chloride	MCM-Boosting	2.3634	0.355105
27	Chlorobenzene	47	Chloroform	MCM-Boosting	2.00548	0.153583
27	Chlorobenzene	50	Cyclohexane	MCM-Boosting	1.21312	0.278763
27	Chlorobenzene	60	Decane	MCM-Boosting	1.45234	0.505875
27	Chlorobenzene	72	N,N-Dimethylformamide (DMF)	MCM-Boosting	1.24596	0.495538
27	Chlorobenzene	78	Dodecane	MCM-Boosting	0.704475	0.433955
27	Chlorobenzene	80	Butyl acetate	MCM-Boosting	1.67697	0.227009
27	Chlorobenzene	89	Hexane	MCM-Boosting	3.4812	0.0690563
27	Chlorobenzene	91	Heptane	MCM-Boosting	2.65777	0.044834
27	Chlorobenzene	97	2,2,4-Trimethylpentane	MCM-Boosting	2.19934	0.412292
27	Chlorobenzene	110	Methanol	MCM-Boosting	1.73235	0.147136
27	Chlorobenzene	112	3-Methylpentane	MCM-Boosting	3.41544	1.25268
27	Chlorobenzene	140	1-Propanol	MCM-Boosting	0.546363	0.176998
27	Chlorobenzene	157	Tetrachloromethane	MCM-Boosting	1.26657	0.0793697
27	Chlorobenzene	161	Toluene	MCM-Boosting	1.79506	0.268059
27	Chlorobenzene	174	Water	MCM-Boosting	0.870942	0.151056
27	Chlorobenzene	250	Cyclohexanone	MCM-Boosting	0.504504	1.09872
27	Chlorobenzene	282	1,2-Propanediol	MCM-Boosting	0.0282299	0.245428
27	Chlorobenzene	284	N-Methyl-2-pyrrolidone	MCM-Boosting	0.565327	0.183453
27	Chlorobenzene	297	Hexafluorobenzene	MCM-Boosting	1.3029	0.206064
27	Chlorobenzene	367	2,3-Dimethylbutane	MCM-Boosting	2.75837	0.741087
27	Chlorobenzene	430	Methyl isopropyl ketone	MCM-Boosting	2.10177	0.254295
27	Chlorobenzene	451	Carbonic acid dimethyl ester	MCM-Boosting	1.70877	0.331676
27	Chlorobenzene	516	Hexadecane	MCM-Boosting	0.31043	0.630346
27	Chlorobenzene	887	Deuterium oxide <Heavy water>	MCM-Boosting	0.687294	0.109936
27	Chlorobenzene	982	Perdeuteromethanol	MCM-Boosting	1.39395	0.215654
27	Chlorobenzene	1090	2,2-Dimethylpentane	MCM-Boosting	2.16083	2.74718
27	Chlorobenzene	3410	1,3,5-Triisopropylbenzene	MCM-Boosting	0.325473	0.435655
27	Chlorobenzene	4331	Hexamethyltetracosane	MCM-Boosting	0.0300776	2.25294
27	Chlorobenzene	16447	1-Ethyl-3-methylimidazolium bis(trifluoromethylsulfonyl)imide	MCM-Boosting	0.0468343	0.531892
27	Chlorobenzene	16583	1-Butyl-3-methylimidazolium bis(trifluoromethylsulfonyl)imide	MCM-Boosting	0.0208211	1.11867
27	Chlorobenzene	16810	1-Octyl-3-methylimidazolium tetrafluoroborate	MCM-Boosting	0.00600007	0.78561
27	Chlorobenzene	18162	1-Hexyl-3-methylimidazolium bis(trifluoromethylsulfonyl)imide	MCM-Boosting	0.0299115	0.37774
27	Chlorobenzene	18174	1-Hexyl-3-methylimidazolium tetrafluoroborate	MCM-Boosting	0.00682446	0.811408
27	Chlorobenzene	18642	1-Ethyl-3-methylimidazolium bis(pentafluoroethylsulfonyl)imide	MCM-Boosting	0.0304422	0.466679
27	Chlorobenzene	18988	1-Ethyl-3-methylimidazolium trifluoromethylsulfonate	MCM-Boosting	0.041015	0.539909
27	Chlorobenzene	20138	1-Butyl-3-methylimidazolium dicyanamide	MCM-Boosting	0.019117	3.80851
27	Chlorobenzene	22417	1-Ethyl-3-methylimidazolium trifluoroacetate	MCM-Boosting	0.0517946	0.416017
27	Chlorobenzene	22674	1-Butyl-3-methylpyridinium tetrafluoroborate	MCM-Boosting	0.0100616	0.665772
30	Nitrobenzene	3	Acetonitrile	MCM-Boosting	2.43136	0.152354
30	Nitrobenzene	4	Acetone	MCM-Boosting	2.95737	0.189797
30	Nitrobenzene	11	Ethanol	MCM-Boosting	0.806385	0.189062
30	Nitrobenzene	12	Diethyl ether	MCM-Boosting	4.12831	0.313614
30	Nitrobenzene	21	Ethyl acetate	MCM-Boosting	2.16273	0.439266
30	Nitrobenzene	25	Ethylbenzene	MCM-Boosting	1.55871	0.856881
30	Nitrobenzene	26	Bromobenzene	MCM-Boosting	1.01831	0.353407
30	Nitrobenzene	27	Chlorobenzene	MCM-Boosting	1.33986	0.426569
30	Nitrobenzene	30	Nitrobenzene	MCM-Boosting	0.526799	0.489499
30	Nitrobenzene	31	Benzene	MCM-Boosting	1.53657	0.242136
30	Nitrobenzene	39	1-Butanol	MCM-Boosting	0.373843	0.337997
30	Nitrobenzene	40	2-Butanone	MCM-Boosting	2.3915	0.518192
30	Nitrobenzene	46	Butyl chloride	MCM-Boosting	2.25274	0.330192
30	Nitrobenzene	47	Chloroform	MCM-Boosting	1.88575	0.165719
30	Nitrobenzene	50	Cyclohexane	MCM-Boosting	1.07959	0.323294
30	Nitrobenzene	60	Decane	MCM-Boosting	1.25847	0.636445
30	Nitrobenzene	72	N,N-Dimethylformamide (DMF)	MCM-Boosting	1.14217	0.850642
30	Nitrobenzene	78	Dodecane	MCM-Boosting	0.784462	0.361946
30	Nitrobenzene	80	Butyl acetate	MCM-Boosting	1.52093	0.251655
30	Nitrobenzene	89	Hexane	MCM-Boosting	3.2348	0.0707249
30	Nitrobenzene	91	Heptane	MCM-Boosting	2.5042	0.0453098
30	Nitrobenzene	97	2,2,4-Trimethylpentane	MCM-Boosting	2.10245	0.39627
30	Nitrobenzene	110	Methanol	MCM-Boosting	1.51482	0.160941
30	Nitrobenzene	112	3-Methylpentane	MCM-Boosting	3.30253	1.11437
30	Nitrobenzene	140	1-Propanol	MCM-Boosting	0.466987	0.208743
30	Nitrobenzene	157	Tetrachloromethane	MCM-Boosting	1.1842	0.0789565
30	Nitrobenzene	161	Toluene	MCM-Boosting	1.72793	0.270186
30	Nitrobenzene	174	Water	MCM-Boosting	0.812481	0.17105
30	Nitrobenzene	250	Cyclohexanone	MCM-Boosting	0.475648	1.07706
30	Nitrobenzene	282	1,2-Propanediol	MCM-Boosting	0.023539	0.300569
30	Nitrobenzene	284	N-Methyl-2-pyrrolidone	MCM-Boosting	0.519791	0.206188
30	Nitrobenzene	297	Hexafluorobenzene	MCM-Boosting	1.26956	0.21077
30	Nitrobenzene	367	2,3-Dimethylbutane	MCM-Boosting	2.66509	0.621069
30	Nitrobenzene	430	Methyl isopropyl ketone	MCM-Boosting	1.82031	0.389749
30	Nitrobenzene	451	Carbonic acid dimethyl ester	MCM-Boosting	1.64402	0.324784
30	Nitrobenzene	516	Hexadecane	MCM-Boosting	0.362844	0.513253
30	Nitrobenzene	887	Deuterium oxide <Heavy water>	MCM-Boosting	0.668546	0.100861
30	Nitrobenzene	982	Perdeuteromethanol	MCM-Boosting	1.34925	0.219346
30	Nitrobenzene	1090	2,2-Dimethylpentane	MCM-Boosting	2.10011	0.940137
30	Nitrobenzene	3410	1,3,5-Triisopropylbenzene	MCM-Boosting	0.320461	0.347235
30	Nitrobenzene	4331	Hexamethyltetracosane	MCM-Boosting	0.0438635	1.97053
30	Nitrobenzene	16447	1-Ethyl-3-methylimidazolium bis(trifluoromethylsulfonyl)imide	MCM-Boosting	0.0349104	0.898706
30	Nitrobenzene	16583	1-Butyl-3-methylimidazolium bis(trifluoromethylsulfonyl)imide	MCM-Boosting	0.0266295	1.097
30	Nitrobenzene	16810	1-Octyl-3-methylimidazolium tetrafluoroborate	MCM-Boosting	0.00387271	1.27866
30	Nitrobenzene	18162	1-Hexyl-3-methylimidazolium bis(trifluoromethylsulfonyl)imide	MCM-Boosting	0.0227841	0.485411
30	Nitrobenzene	18174	1-Hexyl-3-methylimidazolium tetrafluoroborate	MCM-Boosting	0.00454533	1.08488
30	Nitrobenzene	18642	1-Ethyl-3-methylimidazolium bis(pentafluoroethylsulfonyl)imide	MCM-Boosting	0.0238193	0.754543
30	Nitrobenzene	18988	1-Ethyl-3-methylimidazolium trifluoromethylsulfonate	MCM-Boosting	0.0317912	0.861287
30	Nitrobenzene	20138	1-Butyl-3-methylimidazolium dicyanamide	MCM-Boosting	0.0303427	2.21329
30	Nitrobenzene	22417	1-Ethyl-3-methylimidazolium trifluoroacetate	MCM-Boosting	0.0424494	0.554279
30	Nitrobenzene	22674	1-Butyl-3-methylpyridinium tetrafluoroborate	MCM-Boosting	0.00722383	1.06051
31	Benzene	3	Acetonitrile	MCM-Boosting	3.3775	0.0922187
31	Benzene	4	Acetone	MCM-Boosting	4.84212	0.076279
31	Benzene	11	Ethanol	MCM-Boosting	1.39458	0.0605558
31	Benzene	12	Diethyl ether	MCM-Boosting	5.35852	0.382167
31	Benzene	21	Ethyl acetate	MCM-Boosting	2.03615	0.275327
31	Benzene	25	Ethylbenzene	MCM-Boosting	1.98939	1.12048
31	Benzene	26	Bromobenzene	MCM-Boosting	1.64951	0.261146
31	Benzene	27	Chlorobenzene	MCM-Boosting	1.83641	0.415692
31	Benzene	30	Nitrobenzene	MCM-Boosting	0.461048	0.532916
31	Benzene	31	Benzene	MCM-Boosting	2.08345	0.0965829
31	Benzene	39	1-Butanol	MCM-Boosting	0.769735	0.108178
31	Benzene	40	2-Butanone	MCM-Boosting	4.65144	0.158363
31	Benzene	46	Butyl chloride	MCM-Boosting	2.93706	0.306176
31	Benzene	47	Chloroform	MCM-Boosting	2.40692	0.112288
31	Benzene	50	Cyclohexane	MCM-Boosting	1.96276	0.0970418
31	Benzene	60	Decane	MCM-Boosting	2.20077	0.214748
31	Benzene	72	N,N-Dimethylformamide (DMF)	MCM-Boosting	1.69922	0.206789
31	Benzene	78	Dodecane	MCM-Boosting	0.664173	0.377132
31	Benzene	80	Butyl acetate	MCM-Boosting	2.33265	0.119513
31	Benzene	89	Hexane	MCM-Boosting	4.39359	0.0708146
31	Benzene	91	Heptane	MCM-Boosting	3.30899	0.0476706
31	Benzene	97	2,2,4-Trimethylpentane	MCM-Boosting	2.59507	0.492551
31	Benzene	110	Methanol	MCM-Boosting	2.48775	0.0540501
31	Benzene	112	3-Methylpentane	MCM-Boosting	4.16865	1.31995
31	Benzene	140	1-Propanol	MCM-Boosting	0.828508	0.0655749
31	Benzene	157	Tetrachloromethane	MCM-Boosting	1.62983	0.0800762
31	Benzene	161	Toluene	MCM-Boosting	2.50635	0.123177
31	Benzene	174	Water	MCM-Boosting	0.979557	0.0519823
31	Benzene	250	Cyclohexanone	MCM-Boosting	0.800432	0.937391
31	Benzene	282	1,2-Propanediol	MCM-Boosting	0.0421592	0.126161
31	Benzene	284	N-Methyl-2-pyrrolidone	MCM-Boosting	0.748684	0.101964
31	Benzene	297	Hexafluorobenzene	MCM-Boosting	1.5427	0.171379
31	Benzene	367	2,3-Dimethylbutane	MCM-Boosting	3.30398	0.853972
31	Benzene	430	Methyl isopropyl ketone	MCM-Boosting	2.96907	0.109641
31	Benzene	451	Carbonic acid dimethyl ester	MCM-Boosting	2.00699	0.432637
31	Benzene	516	Hexadecane	MCM-Boosting	0.240244	0.421162
31	Benzene	887	Deuterium oxide <Heavy water>	MCM-Boosting	0.801597	0.124748
31	Benzene	982	Perdeuteromethanol	MCM-Boosting	1.82485	0.17425
31	Benzene	1090	2,2-Dimethylpentane	MCM-Boosting	2.76278	1.24678
31	Benzene	3410	1,3,5-Triisopropylbenzene	MCM-Boosting	0.427942	0.477016
31	Benzene	4331	Hexamethyltetracosane	MCM-Boosting	0.0171741	1.41266
31	Benzene	16447	1-Ethyl-3-methylimidazolium bis(trifluoromethylsulfonyl)imide	MCM-Boosting	0.0912768	0.105667
31	Benzene	16583	1-Butyl-3-methylimidazolium bis(trifluoromethylsulfonyl)imide	MCM-Boosting	0.0159809	0.638761
31	Benzene	16810	1-Octyl-3-methylimidazolium tetrafluoroborate	MCM-Boosting	0.0149044	0.0952562
31	Benzene	18162	1-Hexyl-3-methylimidazolium bis(trifluoromethylsulfonyl)imide	MCM-Boosting	0.058128	0.0842679
31	Benzene	18174	1-Hexyl-3-methylimidazolium tetrafluoroborate	MCM-Boosting	0.0170199	0.101714
31	Benzene	18642	1-Ethyl-3-methylimidazolium bis(pentafluoroethylsulfonyl)imide	MCM-Boosting	0.0534017	0.115248
31	Benzene	18988	1-Ethyl-3-methylimidazolium trifluoromethylsulfonate	MCM-Boosting	0.0742289	0.120529
31	Benzene	20138	1-Butyl-3-methylimidazolium dicyanamide	MCM-Boosting	0.00853298	2.45269
31	Benzene	22417	1-Ethyl-3-methylimidazolium trifluoroacetate	MCM-Boosting	0.083631	0.113462
31	Benzene	22674	1-Butyl-3-methylpyridinium tetrafluoroborate	MCM-Boosting	0.0226861	0.104247
39	1-Butanol	3	Acetonitrile	MCM-Boosting	2.84353	0.176021
39	1-Butanol	4	Acetone	MCM-Boosting	3.10459	0.183688
39	1-Butanol	11	Ethanol	MCM-Boosting	0.81418	0.157847
39	1-Butanol	12	Diethyl ether	MCM-Boosting	5.24331	0.419586
39	1-Butanol	21	Ethyl acetate	MCM-Boosting	3.60136	0.315067
39	1-Butanol	25	Ethylbenzene	MCM-Boosting	2.16131	1.06432
39	1-Butanol	26	Bromobenzene	MCM-Boosting	1.13907	0.384489
39	1-Butanol	27	Chlorobenzene	MCM-Boosting	1.52572	0.522205
39	1-Butanol	30	Nitrobenzene	MCM-Boosting	0.928045	0.38991
39	1-Butanol	31	Benzene	MCM-Boosting	2.12761	0.205225
39	1-Butanol	39	1-Butanol	MCM-Boosting	0.344199	0.379419
39	1-Butanol	40	2-Butanone	MCM-Boosting	2.36839	0.491294
39	1-Butanol	46	Butyl chloride	MCM-Boosting	2.95568	0.336996
39	1-Butanol	47	Chloroform	MCM-Boosting	2.41867	0.170792
39	1-Butanol	50	Cyclohexane	MCM-Boosting	1.17559	0.292528
39	1-Butanol	60	Decane	MCM-Boosting	1.30877	0.911752
39	1-Butanol	72	N,N-Dimethylformamide (DMF)	MCM-Boosting	1.31548	0.566761
39	1-Butanol	78	Dodecane	MCM-Boosting	1.4336	0.189142
39	1-Butanol	80	Butyl acetate	MCM-Boosting	1.7566	0.265682
39	1-Butanol	89	Hexane	MCM-Boosting	4.01001	0.0814324
39	1-Butanol	91	Heptane	MCM-Boosting	3.22647	0.0461775
39	1-Butanol	97	2,2,4-Trimethylpentane	MCM-Boosting	2.77069	0.463076
39	1-Butanol	110	Methanol	MCM-Boosting	1.58948	0.123493
39	1-Butanol	112	3-Methylpentane	MCM-Boosting	4.34397	1.0079
39	1-Butanol	140	1-Propanol	MCM-Boosting	0.469863	0.164213
39	1-Butanol	157	Tetrachloromethane	MCM-Boosting	1.50766	0.0891727
39	1-Butanol	161	Toluene	MCM-Boosting	2.31293	0.235938
39	1-Butanol	174	Water	MCM-Boosting	0.971875	0.159483
39	1-Butanol	250	Cyclohexanone	MCM-Boosting	0.623204	1.53273
39	1-Butanol	282	1,2-Propanediol	MCM-Boosting	0.0223873	0.399883
39	1-Butanol	284	N-Methyl-2-pyrrolidone	MCM-Boosting	0.635977	0.190262
39	1-Butanol	297	Hexafluorobenzene	MCM-Boosting	1.77073	0.191741
39	1-Butanol	367	2,3-Dimethylbutane	MCM-Boosting	3.55011	0.769242
39	1-Butanol	430	Methyl isopropyl ketone	MCM-Boosting	1.90111	0.361524
39	1-Butanol	451	Carbonic acid dimethyl ester	MCM-Boosting	2.21033	0.347438
39	1-Butanol	516	Hexadecane	MCM-Boosting	0.790541	0.212636
39	1-Butanol	887	Deuterium oxide <Heavy water>	MCM-Boosting	0.870943	0.105104
39	1-Butanol	982	Perdeuteromethanol	MCM-Boosting	1.79158	0.211938
39	1-Butanol	1090	2,2-Dimethylpentane	MCM-Boosting	2.81498	0.898214
39	1-Butanol	3410	1,3,5-Triisopropylbenzene	MCM-Boosting	0.464572	0.405954
39	1-Butanol	4331	Hexamethyltetracosane	MCM-Boosting	0.151322	0.351319
39	1-Butanol	16447	1-Ethyl-3-methylimidazolium bis(trifluoromethylsulfonyl)imide	MCM-Boosting	0.0285295	0.801856
39	1-Butanol	16583	1-Butyl-3-methylimidazolium bis(trifluoromethylsulfonyl)imide	MCM-Boosting	0.0680147	0.332064
39	1-Butanol	16810	1-Octyl-3-methylimidazolium tetrafluoroborate	MCM-Boosting	0.00232543	1.56593
39	1-Butanol	18162	1-Hexyl-3-methylimidazolium bis(trifluoromethylsulfonyl)imide	MCM-Boosting	0.0185484	0.503178
39	1-Butanol	18174	1-Hexyl-3-methylimidazolium tetrafluoroborate	MCM-Boosting	0.00262416	2.65224
39	1-Butanol	18642	1-Ethyl-3-methylimidazolium bis(pentafluoroethylsulfonyl)imide	MCM-Boosting	0.0216007	0.781329
39	1-Butanol	18988	1-Ethyl-3-methylimidazolium trifluoromethylsulfonate	MCM-Boosting	0.0266395	0.957878
39	1-Butanol	20138	1-Butyl-3-methylimidazolium dicyanamide	MCM-Boosting	0.133978	0.28735
39	1-Butanol	22417	1-Ethyl-3-methylimidazolium trifluoroacetate	MCM-Boosting	0.039958	0.990952
39	1-Butanol	22674	1-Butyl-3-methylpyridinium tetrafluoroborate	MCM-Boosting	0.00474016	1.34175
40	2-Butanone	3	Acetonitrile	MCM-Boosting	3.09811	0.41229
40	2-Butanone	4	Acetone	MCM-Boosting	3.80631	0.604493
40	2-Butanone	11	Ethanol	MCM-Boosting	1.03363	0.507829
40	2-Butanone	12	Diethyl ether	MCM-Boosting	5.4426	1.54927
40	2-Butanone	21	Ethyl acetate	MCM-Boosting	2.85681	1.57087
40	2-Butanone	25	Ethylbenzene	MCM-Boosting	2.03969	61.9321
40	2-Butanone	26	Bromobenzene	MCM-Boosting	1.35085	1.19457
40	2-Butanone	27	Chlorobenzene	MCM-Boosting	1.73591	1.63005
40	2-Butanone	30	Nitrobenzene	MCM-Boosting	0.73542	3.70488
40	2-Butanone	31	Benzene	MCM-Boosting	2.1331	0.589456
40	2-Butanone	39	1-Butanol	MCM-Boosting	0.469585	1.57202
40	2-Butanone	40	2-Butanone	MCM-Boosting	3.09886	3.98283
40	2-Butanone	46	Butyl chloride	MCM-Boosting	3.08153	1.14674
40	2-Butanone	47	Chloroform	MCM-Boosting	2.49725	0.440197
40	2-Butanone	50	Cyclohexane	MCM-Boosting	1.46481	1.00386
40	2-Butanone	60	Decane	MCM-Boosting	1.66597	5.10618
40	2-Butanone	72	N,N-Dimethylformamide (DMF)	MCM-Boosting	1.44435	7.64134
40	2-Butanone	78	Dodecane	MCM-Boosting	1.09469	1.19364
40	2-Butanone	80	Butyl acetate	MCM-Boosting	2.03103	0.759814
40	2-Butanone	89	Hexane	MCM-Boosting	4.28689	0.163271
40	2-Butanone	91	Heptane	MCM-Boosting	3.34031	0.0999923
40	2-Butanone	97	2,2,4-Trimethylpentane	MCM-Boosting	2.8151	2.47966
40	2-Butanone	110	Methanol	MCM-Boosting	1.94198	0.420671
40	2-Butanone	112	3-Methylpentane	MCM-Boosting	4.59817	111.391
40	2-Butanone	140	1-Propanol	MCM-Boosting	0.601148	0.579337
40	2-Butanone	157	Tetrachloromethane	MCM-Boosting	1.58788	0.185095
40	2-Butanone	161	Toluene	MCM-Boosting	2.43268	0.648348
40	2-Butanone	174	Water	MCM-Boosting	1.00617	0.420591
40	2-Butanone	250	Cyclohexanone	MCM-Boosting	0.675683	18.237
40	2-Butanone	282	1,2-Propanediol	MCM-Boosting	0.0296351	1.62513
40	2-Butanone	284	N-Methyl-2-pyrrolidone	MCM-Boosting	0.693998	0.551455
40	2-Butanone	297	Hexafluorobenzene	MCM-Boosting	1.73491	0.770643
40	2-Butanone	367	2,3-Dimethylbutane	MCM-Boosting	3.66242	10.0579
40	2-Butanone	430	Methyl isopropyl ketone	MCM-Boosting	2.35893	1.32831
40	2-Butanone	451	Carbonic acid dimethyl ester	MCM-Boosting	2.20228	0.990216
40	2-Butanone	516	Hexadecane	MCM-Boosting	0.502214	2.65444
40	2-Butanone	887	Deuterium oxide <Heavy water>	MCM-Boosting	0.862187	0.214761
40	2-Butanone	982	Perdeuteromethanol	MCM-Boosting	1.82909	0.545574
40	2-Butanone	1090	2,2-Dimethylpentane	MCM-Boosting	2.70032	11.1853
40	2-Butanone	3410	1,3,5-Triisopropylbenzene	MCM-Boosting	0.458779	1.15602
40	2-Butanone	4331	Hexamethyltetracosane	MCM-Boosting	0.0627785	40.2829
40	2-Butanone	16447	1-Ethyl-3-methylimidazolium bis(trifluoromethylsulfonyl)imide	MCM-Boosting	0.0434071	11.588
40	2-Butanone	16583	1-Butyl-3-methylimidazolium bis(trifluoromethylsulfonyl)imide	MCM-Boosting	0.0392296	98.9606
40	2-Butanone	16810	1-Octyl-3-methylimidazolium tetrafluoroborate	MCM-Boosting	0.00510459	12.7352
40	2-Butanone	18162	1-Hexyl-3-methylimidazolium bis(trifluoromethylsulfonyl)imide	MCM-Boosting	0.0298784	2.35995
40	2-Butanone	18174	1-Hexyl-3-methylimidazolium tetrafluoroborate	MCM-Boosting	0.0056881	163.977
40	2-Butanone	18642	1-Ethyl-3-methylimidazolium bis(pentafluoroethylsulfonyl)imide	MCM-Boosting	0.0313763	5.58627
40	2-Butanone	18988	1-Ethyl-3-methylimidazolium trifluoromethylsulfonate	MCM-Boosting	0.0406928	6.91297
40	2-Butanone	20138	1-Butyl-3-methylimidazolium dicyanamide	MCM-Boosting	0.0476134	44.4337
40	2-Butanone	22417	1-Ethyl-3-methylimidazolium trifluoroacetate	MCM-Boosting	0.0554618	3.32472
40	2-Butanone	22674	1-Butyl-3-methylpyridinium tetrafluoroborate	MCM-Boosting	0.00903706	11.032
41	n-Butane	3	Acetonitrile	MCM-Boosting	3.38981	0.281447
41	n-Butane	4	Acetone	MCM-Boosting	4.15515	0.463119
41	n-Butane	11	Ethanol	MCM-Boosting	1.1315	0.468185
41	n-Butane	12	Diethyl ether	MCM-Boosting	6.14997	1.11374
41	n-Butane	21	Ethyl acetate	MCM-Boosting	3.39888	0.839835
41	n-Butane	25	Ethylbenzene	MCM-Boosting	2.50133	4.03587
41	n-Butane	26	Bromobenzene	MCM-Boosting	1.48874	0.985348
41	n-Butane	27	Chlorobenzene	MCM-Boosting	1.69471	1.00926
41	n-Butane	30	Nitrobenzene	MCM-Boosting	0.865771	1.39475
41	n-Butane	31	Benzene	MCM-Boosting	2.69107	0.247021
41	n-Butane	39	1-Butanol	MCM-Boosting	0.536109	1.00491
41	n-Butane	40	2-Butanone	MCM-Boosting	3.6084	1.48238
41	n-Butane	46	Butyl chloride	MCM-Boosting	3.46629	0.782074
41	n-Butane	47	Chloroform	MCM-Boosting	2.72138	0.250701
41	n-Butane	50	Cyclohexane	MCM-Boosting	1.76677	0.558839
41	n-Butane	60	Decane	MCM-Boosting	1.85841	1.21447
41	n-Butane	72	N,N-Dimethylformamide (DMF)	MCM-Boosting	1.68028	1.34891
41	n-Butane	78	Dodecane	MCM-Boosting	1.28115	1.71884
41	n-Butane	80	Butyl acetate	MCM-Boosting	2.24882	0.479456
41	n-Butane	89	Hexane	MCM-Boosting	4.73751	0.14288
41	n-Butane	91	Heptane	MCM-Boosting	3.75826	0.0795733
41	n-Butane	97	2,2,4-Trimethylpentane	MCM-Boosting	3.12387	0.8734
41	n-Butane	110	Methanol	MCM-Boosting	2.14593	0.379454
41	n-Butane	112	3-Methylpentane	MCM-Boosting	4.9401	36.4344
41	n-Butane	140	1-Propanol	MCM-Boosting	0.65995	0.523403
41	n-Butane	157	Tetrachloromethane	MCM-Boosting	1.81283	0.142355
41	n-Butane	161	Toluene	MCM-Boosting	3.05374	0.311445
41	n-Butane	174	Water	MCM-Boosting	1.02452	0.227644
41	n-Butane	250	Cyclohexanone	MCM-Boosting	0.94004	5.01368
41	n-Butane	282	1,2-Propanediol	MCM-Boosting	0.0311513	0.798855
41	n-Butane	284	N-Methyl-2-pyrrolidone	MCM-Boosting	0.788911	0.298638
41	n-Butane	297	Hexafluorobenzene	MCM-Boosting	1.94748	0.34461
41	n-Butane	367	2,3-Dimethylbutane	MCM-Boosting	4.19961	2.84818
41	n-Butane	430	Methyl isopropyl ketone	MCM-Boosting	2.50702	0.807087
41	n-Butane	451	Carbonic acid dimethyl ester	MCM-Boosting	2.50876	0.73207
41	n-Butane	516	Hexadecane	MCM-Boosting	0.584873	1.70613
41	n-Butane	887	Deuterium oxide <Heavy water>	MCM-Boosting	0.959438	0.20054
41	n-Butane	982	Perdeuteromethanol	MCM-Boosting	2.24646	0.319575
41	n-Butane	1090	2,2-Dimethylpentane	MCM-Boosting	3.62915	3.18097
41	n-Butane	3410	1,3,5-Triisopropylbenzene	MCM-Boosting	0.571414	0.792213
41	n-Butane	4331	Hexamethyltetracosane	MCM-Boosting	0.0825136	11.321
41	n-Butane	16447	1-Ethyl-3-methylimidazolium bis(trifluoromethylsulfonyl)imide	MCM-Boosting	0.0499369	2.27604
41	n-Butane	16583	1-Butyl-3-methylimidazolium bis(trifluoromethylsulfonyl)imide	MCM-Boosting	0.0480941	3.53661
41	n-Butane	16810	1-Octyl-3-methylimidazolium tetrafluoroborate	MCM-Boosting	0.00521099	9.64495
41	n-Butane	18162	1-Hexyl-3-methylimidazolium bis(trifluoromethylsulfonyl)imide	MCM-Boosting	0.033389	1.50644
41	n-Butane	18174	1-Hexyl-3-methylimidazolium tetrafluoroborate	MCM-Boosting	0.00608013	6.61934
41	n-Butane	18642	1-Ethyl-3-methylimidazolium bis(pentafluoroethylsulfonyl)imide	MCM-Boosting	0.0363471	1.99962
41	n-Butane	18988	1-Ethyl-3-methylimidazolium trifluoromethylsulfonate	MCM-Boosting	0.0423583	4.59467
41	n-Butane	20138	1-Butyl-3-methylimidazolium dicyanamide	MCM-Boosting	0.0579481	41.4208
41	n-Butane	22417	1-Ethyl-3-methylimidazolium trifluoroacetate	MCM-Boosting	0.0591821	1.25438
41	n-Butane	22674	1-Butyl-3-methylpyridinium tetrafluoroborate	MCM-Boosting	0.00972801	4.43039
46	Butyl chloride	3	Acetonitrile	MCM-Boosting	3.45571	0.307858
46	Butyl chloride	4	Acetone	MCM-Boosting	5.67483	0.199158
46	Butyl chloride	11	Ethanol	MCM-Boosting	1.71612	0.105071
46	Butyl chloride	12	Diethyl ether	MCM-Boosting	5.03325	1.65905
46	Butyl chloride	21	Ethyl acetate	MCM-Boosting	1.39714	3.14706
46	Butyl chloride	25	Ethylbenzene	MCM-Boosting	1.74227	12.3711
46	Butyl chloride	26	Bromobenzene	MCM-Boosting	1.84265	0.709797
46	Butyl chloride	27	Chlorobenzene	MCM-Boosting	1.82278	1.72868
46	Butyl chloride	30	Nitrobenzene	MCM-Boosting	0.28934	7.36659
46	Butyl chloride	31	Benzene	MCM-Boosting	1.92318	0.519619
46	Butyl chloride	39	1-Butanol	MCM-Boosting	1.08641	0.244344
46	Butyl chloride	40	2-Butanone	MCM-Boosting	6.16737	0.640877
46	Butyl chloride	46	Butyl chloride	MCM-Boosting	2.68192	2.65847
46	Butyl chloride	47	Chloroform	MCM-Boosting	2.2148	0.381713
46	Butyl chloride	50	Cyclohexane	MCM-Boosting	2.41381	0.345843
46	Butyl chloride	60	Decane	MCM-Boosting	2.6762	3.76749
46	Butyl chloride	72	N,N-Dimethylformamide (DMF)	MCM-Boosting	1.84218	16.1218
46	Butyl chloride	78	Dodecane	MCM-Boosting	0.407716	1.81363
46	Butyl chloride	80	Butyl acetate	MCM-Boosting	2.50587	0.546467
46	Butyl chloride	89	Hexane	MCM-Boosting	4.27317	0.151963
46	Butyl chloride	91	Heptane	MCM-Boosting	3.09633	0.103657
46	Butyl chloride	97	2,2,4-Trimethylpentane	MCM-Boosting	2.31602	1.73823
46	Butyl chloride	110	Methanol	MCM-Boosting	2.92962	0.102364
46	Butyl chloride	112	3-Methylpentane	MCM-Boosting	3.70574	15.1498
46	Butyl chloride	140	1-Propanol	MCM-Boosting	1.03705	0.116448
46	Butyl chloride	157	Tetrachloromethane	MCM-Boosting	1.57447	0.17638
46	Butyl chloride	161	Toluene	MCM-Boosting	2.4628	0.568948
46	Butyl chloride	174	Water	MCM-Boosting	0.909392	0.372988
46	Butyl chloride	250	Cyclohexanone	MCM-Boosting	0.876095	27.6104
46	Butyl chloride	282	1,2-Propanediol	MCM-Boosting	0.0533911	0.394153
46	Butyl chloride	284	N-Methyl-2-pyrrolidone	MCM-Boosting	0.768905	0.373278
46	Butyl chloride	297	Hexafluorobenzene	MCM-Boosting	1.34261	0.6731
46	Butyl chloride	367	2,3-Dimethylbutane	MCM-Boosting	2.81514	31.5764
46	Butyl chloride	430	Methyl isopropyl ketone	MCM-Boosting	3.42944	0.619921
46	Butyl chloride	451	Carbonic acid dimethyl ester	MCM-Boosting	1.78197	1.4434
46	Butyl chloride	516	Hexadecane	MCM-Boosting	0.117426	3.50269
46	Butyl chloride	887	Deuterium oxide <Heavy water>	MCM-Boosting	0.719304	0.285838
46	Butyl chloride	982	Perdeuteromethanol	MCM-Boosting	1.7329	0.682613
46	Butyl chloride	1090	2,2-Dimethylpentane	MCM-Boosting	2.54616	17.032
46	Butyl chloride	3410	1,3,5-Triisopropylbenzene	MCM-Boosting	0.373902	3.10431
46	Butyl chloride	4331	Hexamethyltetracosane	MCM-Boosting	0.00530539	120.348
46	Butyl chloride	16447	1-Ethyl-3-methylimidazolium bis(trifluoromethylsulfonyl)imide	MCM-Boosting	0.150075	2.43412
46	Butyl chloride	16583	1-Butyl-3-methylimidazolium bis(trifluoromethylsulfonyl)imide	MCM-Boosting	0.00708782	23.1825
46	Butyl chloride	16810	1-Octyl-3-methylimidazolium tetrafluoroborate	MCM-Boosting	0.0354249	6.5031
46	Butyl chloride	18162	1-Hexyl-3-methylimidazolium bis(trifluoromethylsulfonyl)imide	MCM-Boosting	0.0972553	0.161472
46	Butyl chloride	18174	1-Hexyl-3-methylimidazolium tetrafluoroborate	MCM-Boosting	0.0416397	0.66934
46	Butyl chloride	18642	1-Ethyl-3-methylimidazolium bis(pentafluoroethylsulfonyl)imide	MCM-Boosting	0.0798713	1.03863
46	Butyl chloride	18988	1-Ethyl-3-methylimidazolium trifluoromethylsulfonate	MCM-Boosting	0.117062	14.5618
46	Butyl chloride	20138	1-Butyl-3-methylimidazolium dicyanamide	MCM-Boosting	0.00183647	98.8599
46	Butyl chloride	22417	1-Ethyl-3-methylimidazolium trifluoroacetate	MCM-Boosting	0.11669	0.733641
46	Butyl chloride	22674	1-Butyl-3-methylpyridinium tetrafluoroborate	MCM-Boosting	0.050516	1.11574
47	Chloroform	3	Acetonitrile	MCM-Boosting	2.51117	0.130092
47	Chloroform	4	Acetone	MCM-Boosting	3.15734	0.14367
47	Chloroform	11	Ethanol	MCM-Boosting	0.878077	0.131705
47	Chloroform	12	Diethyl ether	MCM-Boosting	4.2116	0.290382
47	Chloroform	21	Ethyl acetate	MCM-Boosting	2.03441	0.465171
47	Chloroform	25	Ethylbenzene	MCM-Boosting	1.58234	0.679203
47	Chloroform	26	Bromobenzene	MCM-Boosting	1.10676	0.239196
47	Chloroform	27	Chlorobenzene	MCM-Boosting	1.37663	0.320963
47	Chloroform	30	Nitrobenzene	MCM-Boosting	0.489706	0.49204
47	Chloroform	31	Benzene	MCM-Boosting	1.60655	0.202045
47	Chloroform	39	1-Butanol	MCM-Boosting	0.42541	0.24128
47	Chloroform	40	2-Butanone	MCM-Boosting	2.67019	0.376992
47	Chloroform	46	Butyl chloride	MCM-Boosting	2.30801	0.277201
47	Chloroform	47	Chloroform	MCM-Boosting	1.90691	0.140858
47	Chloroform	50	Cyclohexane	MCM-Boosting	1.20205	0.226072
47	Chloroform	60	Decane	MCM-Boosting	1.41822	0.414554
47	Chloroform	72	N,N-Dimethylformamide (DMF)	MCM-Boosting	1.20274	0.60806
47	Chloroform	78	Dodecane	MCM-Boosting	0.722834	0.315742
47	Chloroform	80	Butyl acetate	MCM-Boosting	1.60066	0.206839
47	Chloroform	89	Hexane	MCM-Boosting	3.32966	0.0563118
47	Chloroform	91	Heptane	MCM-Boosting	2.56428	0.0357637
47	Chloroform	97	2,2,4-Trimethylpentane	MCM-Boosting	2.12798	0.339073
47	Chloroform	110	Methanol	MCM-Boosting	1.6372	0.110666
47	Chloroform	112	3-Methylpentane	MCM-Boosting	3.34593	0.725468
47	Chloroform	140	1-Propanol	MCM-Boosting	0.511783	0.141934
47	Chloroform	157	Tetrachloromethane	MCM-Boosting	1.22498	0.0685611
47	Chloroform	161	Toluene	MCM-Boosting	1.83774	0.219221
47	Chloroform	174	Water	MCM-Boosting	0.810798	0.149961
47	Chloroform	250	Cyclohexanone	MCM-Boosting	0.531652	0.671123
47	Chloroform	282	1,2-Propanediol	MCM-Boosting	0.0258109	0.221157
47	Chloroform	284	N-Methyl-2-pyrrolidone	MCM-Boosting	0.546883	0.155534
47	Chloroform	297	Hexafluorobenzene	MCM-Boosting	1.26567	0.182617
47	Chloroform	367	2,3-Dimethylbutane	MCM-Boosting	2.68458	0.627578
47	Chloroform	430	Methyl isopropyl ketone	MCM-Boosting	1.93718	0.243887
47	Chloroform	451	Carbonic acid dimethyl ester	MCM-Boosting	1.63551	0.255891
47	Chloroform	516	Hexadecane	MCM-Boosting	0.316217	0.458589
47	Chloroform	887	Deuterium oxide <Heavy water>	MCM-Boosting	0.673446	0.087273
47	Chloroform	982	Perdeuteromethanol	MCM-Boosting	1.40607	0.19651
47	Chloroform	1090	2,2-Dimethylpentane	MCM-Boosting	2.17272	0.647973
47	Chloroform	3410	1,3,5-Triisopropylbenzene	MCM-Boosting	0.333257	0.295168
47	Chloroform	4331	Hexamethyltetracosane	MCM-Boosting	0.0342169	1.46274
47	Chloroform	16447	1-Ethyl-3-methylimidazolium bis(trifluoromethylsulfonyl)imide	MCM-Boosting	0.0420905	0.477057
47	Chloroform	16583	1-Butyl-3-methylimidazolium bis(trifluoromethylsulfonyl)imide	MCM-Boosting	0.022409	0.980927
47	Chloroform	16810	1-Octyl-3-methylimidazolium tetrafluoroborate	MCM-Boosting	0.00516025	0.770364
47	Chloroform	18162	1-Hexyl-3-methylimidazolium bis(trifluoromethylsulfonyl)imide	MCM-Boosting	0.0271166	0.272541
47	Chloroform	18174	1-Hexyl-3-methylimidazolium tetrafluoroborate	MCM-Boosting	0.00581865	0.770198
47	Chloroform	18642	1-Ethyl-3-methylimidazolium bis(pentafluoroethylsulfonyl)imide	MCM-Boosting	0.0281834	0.386484
47	Chloroform	18988	1-Ethyl-3-methylimidazolium trifluoromethylsulfonate	MCM-Boosting	0.0364134	0.570285
47	Chloroform	20138	1-Butyl-3-methylimidazolium dicyanamide	MCM-Boosting	0.0220225	1.60062
47	Chloroform	22417	1-Ethyl-3-methylimidazolium trifluoroacetate	MCM-Boosting	0.047054	0.476267
47	Chloroform	22674	1-Butyl-3-methylpyridinium tetrafluoroborate	MCM-Boosting	0.00893467	0.591202
49	3-Methylphenol	3	Acetonitrile	MCM-Boosting	2.48783	0.159871
49	3-Methylphenol	4	Acetone	MCM-Boosting	2.91173	0.174678
49	3-Methylphenol	11	Ethanol	MCM-Boosting	0.788786	0.154196
49	3-Methylphenol	12	Diethyl ether	MCM-Boosting	4.38676	0.298811
49	3-Methylphenol	21	Ethyl acetate	MCM-Boosting	2.54017	0.324452
49	3-Methylphenol	25	Ethylbenzene	MCM-Boosting	1.69087	0.623648
49	3-Methylphenol	26	Bromobenzene	MCM-Boosting	1.03351	0.286662
49	3-Methylphenol	27	Chlorobenzene	MCM-Boosting	1.35459	0.341042
49	3-Methylphenol	30	Nitrobenzene	MCM-Boosting	0.624528	0.347552
49	3-Methylphenol	31	Benzene	MCM-Boosting	1.70383	0.215396
49	3-Methylphenol	39	1-Butanol	MCM-Boosting	0.352262	0.337694
49	3-Methylphenol	40	2-Butanone	MCM-Boosting	2.32946	0.43553
49	3-Methylphenol	46	Butyl chloride	MCM-Boosting	2.3924	0.315754
49	3-Methylphenol	47	Chloroform	MCM-Boosting	1.99643	0.160445
49	3-Methylphenol	50	Cyclohexane	MCM-Boosting	1.09233	0.274105
49	3-Methylphenol	60	Decane	MCM-Boosting	1.24013	0.652811
49	3-Methylphenol	72	N,N-Dimethylformamide (DMF)	MCM-Boosting	1.15174	0.754364
49	3-Methylphenol	78	Dodecane	MCM-Boosting	0.933274	0.242153
49	3-Methylphenol	80	Butyl acetate	MCM-Boosting	1.54806	0.229711
49	3-Methylphenol	89	Hexane	MCM-Boosting	3.385	0.0652657
49	3-Methylphenol	91	Heptane	MCM-Boosting	2.66219	0.0388187
49	3-Methylphenol	97	2,2,4-Trimethylpentane	MCM-Boosting	2.25803	0.322132
49	3-Methylphenol	110	Methanol	MCM-Boosting	1.50545	0.127377
49	3-Methylphenol	112	3-Methylpentane	MCM-Boosting	3.57914	0.604194
49	3-Methylphenol	140	1-Propanol	MCM-Boosting	0.454862	0.166108
49	3-Methylphenol	157	Tetrachloromethane	MCM-Boosting	1.25481	0.0705991
49	3-Methylphenol	161	Toluene	MCM-Boosting	1.87811	0.249352
49	3-Methylphenol	174	Water	MCM-Boosting	0.835523	0.163596
49	3-Methylphenol	250	Cyclohexanone	MCM-Boosting	0.521575	0.766384
49	3-Methylphenol	282	1,2-Propanediol	MCM-Boosting	0.0224302	0.27363
49	3-Methylphenol	284	N-Methyl-2-pyrrolidone	MCM-Boosting	0.545957	0.17754
49	3-Methylphenol	297	Hexafluorobenzene	MCM-Boosting	1.39281	0.17975
49	3-Methylphenol	367	2,3-Dimethylbutane	MCM-Boosting	2.85362	0.553535
49	3-Methylphenol	430	Methyl isopropyl ketone	MCM-Boosting	1.7717	0.371189
49	3-Methylphenol	451	Carbonic acid dimethyl ester	MCM-Boosting	1.78612	0.250566
49	3-Methylphenol	516	Hexadecane	MCM-Boosting	0.457212	0.334788
49	3-Methylphenol	887	Deuterium oxide <Heavy water>	MCM-Boosting	0.718736	0.0826027
49	3-Methylphenol	982	Perdeuteromethanol	MCM-Boosting	1.4652	0.201945
49	3-Methylphenol	1090	2,2-Dimethylpentane	MCM-Boosting	2.27614	0.635987
49	3-Methylphenol	3410	1,3,5-Triisopropylbenzene	MCM-Boosting	0.362077	0.27785
49	3-Methylphenol	4331	Hexamethyltetracosane	MCM-Boosting	0.0657492	1.3512
49	3-Methylphenol	16447	1-Ethyl-3-methylimidazolium bis(trifluoromethylsulfonyl)imide	MCM-Boosting	0.0312394	0.693622
49	3-Methylphenol	16583	1-Butyl-3-methylimidazolium bis(trifluoromethylsulfonyl)imide	MCM-Boosting	0.0349179	0.638237
49	3-Methylphenol	16810	1-Octyl-3-methylimidazolium tetrafluoroborate	MCM-Boosting	0.00317043	1.0268
49	3-Methylphenol	18162	1-Hexyl-3-methylimidazolium bis(trifluoromethylsulfonyl)imide	MCM-Boosting	0.0207381	0.406079
49	3-Methylphenol	18174	1-Hexyl-3-methylimidazolium tetrafluoroborate	MCM-Boosting	0.00363236	1.1742
49	3-Methylphenol	18642	1-Ethyl-3-methylimidazolium bis(pentafluoroethylsulfonyl)imide	MCM-Boosting	0.0224101	0.69576
49	3-Methylphenol	18988	1-Ethyl-3-methylimidazolium trifluoromethylsulfonate	MCM-Boosting	0.029053	0.674193
49	3-Methylphenol	20138	1-Butyl-3-methylimidazolium dicyanamide	MCM-Boosting	0.0489359	0.942459
49	3-Methylphenol	22417	1-Ethyl-3-methylimidazolium trifluoroacetate	MCM-Boosting	0.040051	0.500566
49	3-Methylphenol	22674	1-Butyl-3-methylpyridinium tetrafluoroborate	MCM-Boosting	0.00618562	0.821421
50	Cyclohexane	3	Acetonitrile	MCM-Boosting	2.87266	0.128549
50	Cyclohexane	4	Acetone	MCM-Boosting	3.5875	0.166284
50	Cyclohexane	11	Ethanol	MCM-Boosting	0.992712	0.162076
50	Cyclohexane	12	Diethyl ether	MCM-Boosting	5.09229	0.248166
50	Cyclohexane	21	Ethyl acetate	MCM-Boosting	2.62427	0.287596
50	Cyclohexane	25	Ethylbenzene	MCM-Boosting	1.99115	0.718476
50	Cyclohexane	26	Bromobenzene	MCM-Boosting	1.25747	0.246995
50	Cyclohexane	27	Chlorobenzene	MCM-Boosting	1.48992	0.310233
50	Cyclohexane	30	Nitrobenzene	MCM-Boosting	0.638679	0.393569
50	Cyclohexane	31	Benzene	MCM-Boosting	2.10714	0.1027
50	Cyclohexane	39	1-Butanol	MCM-Boosting	0.476837	0.272696
50	Cyclohexane	40	2-Butanone	MCM-Boosting	3.13259	0.307843
50	Cyclohexane	46	Butyl chloride	MCM-Boosting	2.82466	0.229113
50	Cyclohexane	47	Chloroform	MCM-Boosting	2.24067	0.119265
50	Cyclohexane	50	Cyclohexane	MCM-Boosting	1.48468	0.181577
50	Cyclohexane	60	Decane	MCM-Boosting	1.60262	0.361682
50	Cyclohexane	72	N,N-Dimethylformamide (DMF)	MCM-Boosting	1.42712	0.312321
50	Cyclohexane	78	Dodecane	MCM-Boosting	0.955009	0.290066
50	Cyclohexane	80	Butyl acetate	MCM-Boosting	1.8969	0.176743
50	Cyclohexane	89	Hexane	MCM-Boosting	3.9345	0.059167
50	Cyclohexane	91	Heptane	MCM-Boosting	3.089	0.0345175
50	Cyclohexane	97	2,2,4-Trimethylpentane	MCM-Boosting	2.55355	0.271519
50	Cyclohexane	110	Methanol	MCM-Boosting	1.86518	0.13474
50	Cyclohexane	112	3-Methylpentane	MCM-Boosting	4.17975	0.4588
50	Cyclohexane	140	1-Propanol	MCM-Boosting	0.580745	0.175001
50	Cyclohexane	157	Tetrachloromethane	MCM-Boosting	1.47736	0.0622236
50	Cyclohexane	161	Toluene	MCM-Boosting	2.41994	0.123001
50	Cyclohexane	174	Water	MCM-Boosting	0.88761	0.0894801
50	Cyclohexane	250	Cyclohexanone	MCM-Boosting	0.731008	0.514873
50	Cyclohexane	282	1,2-Propanediol	MCM-Boosting	0.0276055	0.257749
50	Cyclohexane	284	N-Methyl-2-pyrrolidone	MCM-Boosting	0.65025	0.139609
50	Cyclohexane	297	Hexafluorobenzene	MCM-Boosting	1.56473	0.147257
50	Cyclohexane	367	2,3-Dimethylbutane	MCM-Boosting	3.31347	0.532655
50	Cyclohexane	430	Methyl isopropyl ketone	MCM-Boosting	2.17193	0.245529
50	Cyclohexane	451	Carbonic acid dimethyl ester	MCM-Boosting	1.99048	0.240594
50	Cyclohexane	516	Hexadecane	MCM-Boosting	0.419583	0.481147
50	Cyclohexane	887	Deuterium oxide <Heavy water>	MCM-Boosting	0.794341	0.0760969
50	Cyclohexane	982	Perdeuteromethanol	MCM-Boosting	1.79983	0.119005
50	Cyclohexane	1090	2,2-Dimethylpentane	MCM-Boosting	2.67399	0.493218
50	Cyclohexane	3410	1,3,5-Triisopropylbenzene	MCM-Boosting	0.44031	0.237905
50	Cyclohexane	4331	Hexamethyltetracosane	MCM-Boosting	0.0514307	1.24191
50	Cyclohexane	16447	1-Ethyl-3-methylimidazolium bis(trifluoromethylsulfonyl)imide	MCM-Boosting	0.0458798	0.459124
50	Cyclohexane	16583	1-Butyl-3-methylimidazolium bis(trifluoromethylsulfonyl)imide	MCM-Boosting	0.033006	0.708861
50	Cyclohexane	16810	1-Octyl-3-methylimidazolium tetrafluoroborate	MCM-Boosting	0.00518241	0.811729
50	Cyclohexane	18162	1-Hexyl-3-methylimidazolium bis(trifluoromethylsulfonyl)imide	MCM-Boosting	0.0301607	0.355059
50	Cyclohexane	18174	1-Hexyl-3-methylimidazolium tetrafluoroborate	MCM-Boosting	0.00604561	0.753533
50	Cyclohexane	18642	1-Ethyl-3-methylimidazolium bis(pentafluoroethylsulfonyl)imide	MCM-Boosting	0.031438	0.423908
50	Cyclohexane	18988	1-Ethyl-3-methylimidazolium trifluoromethylsulfonate	MCM-Boosting	0.0397537	0.490938
50	Cyclohexane	20138	1-Butyl-3-methylimidazolium dicyanamide	MCM-Boosting	0.0348376	2.13058
50	Cyclohexane	22417	1-Ethyl-3-methylimidazolium trifluoroacetate	MCM-Boosting	0.0524411	0.359801
50	Cyclohexane	22674	1-Butyl-3-methylpyridinium tetrafluoroborate	MCM-Boosting	0.00932346	0.628501
72	N,N-Dimethylformamide (DMF)	3	Acetonitrile	MCM-Boosting	2.96439	0.310265
72	N,N-Dimethylformamide (DMF)	4	Acetone	MCM-Boosting	3.69694	0.397568
72	N,N-Dimethylformamide (DMF)	11	Ethanol	MCM-Boosting	1.01979	0.44174
72	N,N-Dimethylformamide (DMF)	12	Diethyl ether	MCM-Boosting	5.51556	0.690984
72	N,N-Dimethylformamide (DMF)	21	Ethyl acetate	MCM-Boosting	2.97244	0.780745
72	N,N-Dimethylformamide (DMF)	25	Ethylbenzene	MCM-Boosting	2.21603	4.90534
72	N,N-Dimethylformamide (DMF)	26	Bromobenzene	MCM-Boosting	1.31229	0.805347
72	N,N-Dimethylformamide (DMF)	27	Chlorobenzene	MCM-Boosting	1.41192	1.04674
72	N,N-Dimethylformamide (DMF)	30	Nitrobenzene	MCM-Boosting	0.755526	1.02317
72	N,N-Dimethylformamide (DMF)	31	Benzene	MCM-Boosting	2.5182	0.211708
72	N,N-Dimethylformamide (DMF)	39	1-Butanol	MCM-Boosting	0.490068	0.835736
72	N,N-Dimethylformamide (DMF)	40	2-Butanone	MCM-Boosting	3.36807	0.936188
72	N,N-Dimethylformamide (DMF)	46	Butyl chloride	MCM-Boosting	3.13314	0.549285
72	N,N-Dimethylformamide (DMF)	47	Chloroform	MCM-Boosting	2.34305	0.272861
72	N,N-Dimethylformamide (DMF)	50	Cyclohexane	MCM-Boosting	1.69738	0.468279
72	N,N-Dimethylformamide (DMF)	60	Decane	MCM-Boosting	1.67641	1.54766
72	N,N-Dimethylformamide (DMF)	72	N,N-Dimethylformamide (DMF)	MCM-Boosting	1.51535	1.44788
72	N,N-Dimethylformamide (DMF)	78	Dodecane	MCM-Boosting	1.10304	0.820784
72	N,N-Dimethylformamide (DMF)	80	Butyl acetate	MCM-Boosting	2.0372	0.466944
72	N,N-Dimethylformamide (DMF)	89	Hexane	MCM-Boosting	4.17117	0.140327
72	N,N-Dimethylformamide (DMF)	91	Heptane	MCM-Boosting	3.32222	0.0799267
72	N,N-Dimethylformamide (DMF)	97	2,2,4-Trimethylpentane	MCM-Boosting	2.68806	1.03276
72	N,N-Dimethylformamide (DMF)	110	Methanol	MCM-Boosting	1.93612	0.356867
72	N,N-Dimethylformamide (DMF)	112	3-Methylpentane	MCM-Boosting	4.2708	5.8684
72	N,N-Dimethylformamide (DMF)	140	1-Propanol	MCM-Boosting	0.596985	0.474232
72	N,N-Dimethylformamide (DMF)	157	Tetrachloromethane	MCM-Boosting	1.60866	0.13781
72	N,N-Dimethylformamide (DMF)	161	Toluene	MCM-Boosting	2.90904	0.255147
72	N,N-Dimethylformamide (DMF)	174	Water	MCM-Boosting	0.870719	0.205572
72	N,N-Dimethylformamide (DMF)	250	Cyclohexanone	MCM-Boosting	0.851416	2.69539
72	N,N-Dimethylformamide (DMF)	282	1,2-Propanediol	MCM-Boosting	0.0267682	1.05419
72	N,N-Dimethylformamide (DMF)	284	N-Methyl-2-pyrrolidone	MCM-Boosting	0.704317	0.311195
72	N,N-Dimethylformamide (DMF)	297	Hexafluorobenzene	MCM-Boosting	1.70395	0.36098
72	N,N-Dimethylformamide (DMF)	367	2,3-Dimethylbutane	MCM-Boosting	3.80225	4.02513
72	N,N-Dimethylformamide (DMF)	430	Methyl isopropyl ketone	MCM-Boosting	2.19418	0.639745
72	N,N-Dimethylformamide (DMF)	451	Carbonic acid dimethyl ester	MCM-Boosting	2.16956	0.643322
72	N,N-Dimethylformamide (DMF)	516	Hexadecane	MCM-Boosting	0.485259	2.0097
72	N,N-Dimethylformamide (DMF)	887	Deuterium oxide <Heavy water>	MCM-Boosting	0.853688	0.173078
72	N,N-Dimethylformamide (DMF)	982	Perdeuteromethanol	MCM-Boosting	2.09523	0.248911
72	N,N-Dimethylformamide (DMF)	1090	2,2-Dimethylpentane	MCM-Boosting	3.08805	2.0811
72	N,N-Dimethylformamide (DMF)	3410	1,3,5-Triisopropylbenzene	MCM-Boosting	0.536455	0.659451
72	N,N-Dimethylformamide (DMF)	4331	Hexamethyltetracosane	MCM-Boosting	0.065472	7.34586
72	N,N-Dimethylformamide (DMF)	16447	1-Ethyl-3-methylimidazolium bis(trifluoromethylsulfonyl)imide	MCM-Boosting	0.045141	2.76434
72	N,N-Dimethylformamide (DMF)	16583	1-Butyl-3-methylimidazolium bis(trifluoromethylsulfonyl)imide	MCM-Boosting	0.0407232	4.11195
72	N,N-Dimethylformamide (DMF)	16810	1-Octyl-3-methylimidazolium tetrafluoroborate	MCM-Boosting	0.00466015	7.92134
72	N,N-Dimethylformamide (DMF)	18162	1-Hexyl-3-methylimidazolium bis(trifluoromethylsulfonyl)imide	MCM-Boosting	0.0299394	1.51281
72	N,N-Dimethylformamide (DMF)	18174	1-Hexyl-3-methylimidazolium tetrafluoroborate	MCM-Boosting	0.00552712	11.8305
72	N,N-Dimethylformamide (DMF)	18642	1-Ethyl-3-methylimidazolium bis(pentafluoroethylsulfonyl)imide	MCM-Boosting	0.0319467	1.62141
72	N,N-Dimethylformamide (DMF)	18988	1-Ethyl-3-methylimidazolium trifluoromethylsulfonate	MCM-Boosting	0.0393503	4.43243
72	N,N-Dimethylformamide (DMF)	20138	1-Butyl-3-methylimidazolium dicyanamide	MCM-Boosting	0.0473412	29.3917
72	N,N-Dimethylformamide (DMF)	22417	1-Ethyl-3-methylimidazolium trifluoroacetate	MCM-Boosting	0.0535011	1.28274
72	N,N-Dimethylformamide (DMF)	22674	1-Butyl-3-methylpyridinium tetrafluoroborate	MCM-Boosting	0.00878756	3.89006
77	2,6-Dimethylpyridine	3	Acetonitrile	MCM-Boosting	2.51634	0.287013
77	2,6-Dimethylpyridine	4	Acetone	MCM-Boosting	3.11117	0.435439
77	2,6-Dimethylpyridine	11	Ethanol	MCM-Boosting	0.865482	0.454161
77	2,6-Dimethylpyridine	12	Diethyl ether	MCM-Boosting	4.31003	0.860738
77	2,6-Dimethylpyridine	21	Ethyl acetate	MCM-Boosting	2.30357	0.782334
77	2,6-Dimethylpyridine	25	Ethylbenzene	MCM-Boosting	1.70527	3.70251
77	2,6-Dimethylpyridine	26	Bromobenzene	MCM-Boosting	1.07519	0.831181
77	2,6-Dimethylpyridine	27	Chlorobenzene	MCM-Boosting	1.21822	1.21922
77	2,6-Dimethylpyridine	30	Nitrobenzene	MCM-Boosting	0.575672	1.15697
77	2,6-Dimethylpyridine	31	Benzene	MCM-Boosting	1.96162	0.228127
77	2,6-Dimethylpyridine	39	1-Butanol	MCM-Boosting	0.4184	0.861606
77	2,6-Dimethylpyridine	40	2-Butanone	MCM-Boosting	2.89541	0.992429
77	2,6-Dimethylpyridine	46	Butyl chloride	MCM-Boosting	2.50711	0.736704
77	2,6-Dimethylpyridine	47	Chloroform	MCM-Boosting	1.93239	0.26641
77	2,6-Dimethylpyridine	50	Cyclohexane	MCM-Boosting	1.36426	0.480038
77	2,6-Dimethylpyridine	60	Decane	MCM-Boosting	1.39125	1.27725
77	2,6-Dimethylpyridine	72	N,N-Dimethylformamide (DMF)	MCM-Boosting	1.24954	1.47776
77	2,6-Dimethylpyridine	78	Dodecane	MCM-Boosting	0.847281	1.09572
77	2,6-Dimethylpyridine	80	Butyl acetate	MCM-Boosting	1.65771	0.510445
77	2,6-Dimethylpyridine	89	Hexane	MCM-Boosting	3.44208	0.141417
77	2,6-Dimethylpyridine	91	Heptane	MCM-Boosting	2.70011	0.0855918
77	2,6-Dimethylpyridine	97	2,2,4-Trimethylpentane	MCM-Boosting	2.15984	0.969496
77	2,6-Dimethylpyridine	110	Methanol	MCM-Boosting	1.6432	0.377102
77	2,6-Dimethylpyridine	112	3-Methylpentane	MCM-Boosting	3.38447	5.47529
77	2,6-Dimethylpyridine	140	1-Propanol	MCM-Boosting	0.506765	0.503436
77	2,6-Dimethylpyridine	157	Tetrachloromethane	MCM-Boosting	1.29186	0.152508
77	2,6-Dimethylpyridine	161	Toluene	MCM-Boosting	2.29579	0.264036
77	2,6-Dimethylpyridine	174	Water	MCM-Boosting	0.751847	0.217008
77	2,6-Dimethylpyridine	250	Cyclohexanone	MCM-Boosting	0.707439	3.76126
77	2,6-Dimethylpyridine	282	1,2-Propanediol	MCM-Boosting	0.0232826	0.814316
77	2,6-Dimethylpyridine	284	N-Methyl-2-pyrrolidone	MCM-Boosting	0.579001	0.304046
77	2,6-Dimethylpyridine	297	Hexafluorobenzene	MCM-Boosting	1.37358	0.316853
77	2,6-Dimethylpyridine	367	2,3-Dimethylbutane	MCM-Boosting	2.98217	1.97573
77	2,6-Dimethylpyridine	430	Methyl isopropyl ketone	MCM-Boosting	1.86645	0.740024
77	2,6-Dimethylpyridine	451	Carbonic acid dimethyl ester	MCM-Boosting	1.74929	0.623592
77	2,6-Dimethylpyridine	516	Hexadecane	MCM-Boosting	0.3636	1.79804
77	2,6-Dimethylpyridine	887	Deuterium oxide <Heavy water>	MCM-Boosting	0.709239	0.177378
77	2,6-Dimethylpyridine	982	Perdeuteromethanol	MCM-Boosting	1.69912	0.273831
77	2,6-Dimethylpyridine	1090	2,2-Dimethylpentane	MCM-Boosting	2.47092	4.39127
77	2,6-Dimethylpyridine	3410	1,3,5-Triisopropylbenzene	MCM-Boosting	0.413449	0.692083
77	2,6-Dimethylpyridine	4331	Hexamethyltetracosane	MCM-Boosting	0.047666	8.41893
77	2,6-Dimethylpyridine	16447	1-Ethyl-3-methylimidazolium bis(trifluoromethylsulfonyl)imide	MCM-Boosting	0.0388308	2.01105
77	2,6-Dimethylpyridine	16583	1-Butyl-3-methylimidazolium bis(trifluoromethylsulfonyl)imide	MCM-Boosting	0.0294008	4.22814
77	2,6-Dimethylpyridine	16810	1-Octyl-3-methylimidazolium tetrafluoroborate	MCM-Boosting	0.00428171	7.67445
77	2,6-Dimethylpyridine	18162	1-Hexyl-3-methylimidazolium bis(trifluoromethylsulfonyl)imide	MCM-Boosting	0.0258868	1.26618
77	2,6-Dimethylpyridine	18174	1-Hexyl-3-methylimidazolium tetrafluoroborate	MCM-Boosting	0.00497322	5.78989
77	2,6-Dimethylpyridine	18642	1-Ethyl-3-methylimidazolium bis(pentafluoroethylsulfonyl)imide	MCM-Boosting	0.027567	2.06283
77	2,6-Dimethylpyridine	18988	1-Ethyl-3-methylimidazolium trifluoromethylsulfonate	MCM-Boosting	0.033685	2.74942
77	2,6-Dimethylpyridine	20138	1-Butyl-3-methylimidazolium dicyanamide	MCM-Boosting	0.0327671	33.8147
77	2,6-Dimethylpyridine	22417	1-Ethyl-3-methylimidazolium trifluoroacetate	MCM-Boosting	0.0442067	1.69854
77	2,6-Dimethylpyridine	22674	1-Butyl-3-methylpyridinium tetrafluoroborate	MCM-Boosting	0.00785191	4.25457
78	Dodecane	3	Acetonitrile	MCM-Boosting	1.85711	0.296294
78	Dodecane	4	Acetone	MCM-Boosting	1.97501	0.277143
78	Dodecane	11	Ethanol	MCM-Boosting	0.520684	0.148767
78	Dodecane	12	Diethyl ether	MCM-Boosting	3.41382	0.635155
78	Dodecane	21	Ethyl acetate	MCM-Boosting	2.35402	0.593771
78	Dodecane	25	Ethylbenzene	MCM-Boosting	1.34143	1.69931
78	Dodecane	26	Bromobenzene	MCM-Boosting	0.698931	0.579916
78	Dodecane	27	Chlorobenzene	MCM-Boosting	0.964976	0.849824
78	Dodecane	30	Nitrobenzene	MCM-Boosting	0.6193	0.523045
78	Dodecane	31	Benzene	MCM-Boosting	1.37211	0.302382
78	Dodecane	39	1-Butanol	MCM-Boosting	0.214299	0.512986
78	Dodecane	40	2-Butanone	MCM-Boosting	1.47198	0.840228
78	Dodecane	46	Butyl chloride	MCM-Boosting	1.89574	0.45869
78	Dodecane	47	Chloroform	MCM-Boosting	1.53209	0.27117
78	Dodecane	50	Cyclohexane	MCM-Boosting	0.730014	0.457457
78	Dodecane	60	Decane	MCM-Boosting	0.828368	1.42704
78	Dodecane	72	N,N-Dimethylformamide (DMF)	MCM-Boosting	0.852782	1.57264
78	Dodecane	78	Dodecane	MCM-Boosting	0.939478	0.223826
78	Dodecane	80	Butyl acetate	MCM-Boosting	1.09391	0.364658
78	Dodecane	89	Hexane	MCM-Boosting	2.56466	0.102573
78	Dodecane	91	Heptane	MCM-Boosting	2.05824	0.0580859
78	Dodecane	97	2,2,4-Trimethylpentane	MCM-Boosting	1.78954	0.607527
78	Dodecane	110	Methanol	MCM-Boosting	1.03389	0.127888
78	Dodecane	112	3-Methylpentane	MCM-Boosting	2.79879	1.58059
78	Dodecane	140	1-Propanol	MCM-Boosting	0.296522	0.184655
78	Dodecane	157	Tetrachloromethane	MCM-Boosting	0.944374	0.1152
78	Dodecane	161	Toluene	MCM-Boosting	1.47048	0.379738
78	Dodecane	174	Water	MCM-Boosting	0.659336	0.255567
78	Dodecane	250	Cyclohexanone	MCM-Boosting	0.396992	1.75008
78	Dodecane	282	1,2-Propanediol	MCM-Boosting	0.0139367	0.726981
78	Dodecane	284	N-Methyl-2-pyrrolidone	MCM-Boosting	0.402778	0.328067
78	Dodecane	297	Hexafluorobenzene	MCM-Boosting	1.1196	0.285533
78	Dodecane	367	2,3-Dimethylbutane	MCM-Boosting	2.31614	1.28592
78	Dodecane	430	Methyl isopropyl ketone	MCM-Boosting	1.21042	0.621365
78	Dodecane	451	Carbonic acid dimethyl ester	MCM-Boosting	1.41379	0.511222
78	Dodecane	516	Hexadecane	MCM-Boosting	0.513363	0.317439
78	Dodecane	887	Deuterium oxide <Heavy water>	MCM-Boosting	0.593354	0.126608
78	Dodecane	982	Perdeuteromethanol	MCM-Boosting	1.17463	0.290614
78	Dodecane	1090	2,2-Dimethylpentane	MCM-Boosting	1.76122	1.24716
78	Dodecane	3410	1,3,5-Triisopropylbenzene	MCM-Boosting	0.291501	0.469423
78	Dodecane	4331	Hexamethyltetracosane	MCM-Boosting	0.102567	0.537857
78	Dodecane	16447	1-Ethyl-3-methylimidazolium bis(trifluoromethylsulfonyl)imide	MCM-Boosting	0.0164293	1.55806
78	Dodecane	16583	1-Butyl-3-methylimidazolium bis(trifluoromethylsulfonyl)imide	MCM-Boosting	0.0439057	0.729812
78	Dodecane	16810	1-Octyl-3-methylimidazolium tetrafluoroborate	MCM-Boosting	0.00132432	45.038
78	Dodecane	18162	1-Hexyl-3-methylimidazolium bis(trifluoromethylsulfonyl)imide	MCM-Boosting	0.0107783	0.659253
78	Dodecane	18174	1-Hexyl-3-methylimidazolium tetrafluoroborate	MCM-Boosting	0.00148556	4.6311
78	Dodecane	18642	1-Ethyl-3-methylimidazolium bis(pentafluoroethylsulfonyl)imide	MCM-Boosting	0.0126721	2.34546
78	Dodecane	18988	1-Ethyl-3-methylimidazolium trifluoromethylsulfonate	MCM-Boosting	0.0157858	3.23879
78	Dodecane	20138	1-Butyl-3-methylimidazolium dicyanamide	MCM-Boosting	0.0939089	0.287541
78	Dodecane	22417	1-Ethyl-3-methylimidazolium trifluoroacetate	MCM-Boosting	0.0232005	1.16286
78	Dodecane	22674	1-Butyl-3-methylpyridinium tetrafluoroborate	MCM-Boosting	0.00276167	1.86822
79	Benzaldehyde	3	Acetonitrile	MCM-Boosting	2.74646	0.176536
79	Benzaldehyde	4	Acetone	MCM-Boosting	3.61074	0.170953
79	Benzaldehyde	11	Ethanol	MCM-Boosting	1.0066	0.137302
79	Benzaldehyde	12	Diethyl ether	MCM-Boosting	4.45934	0.454099
79	Benzaldehyde	21	Ethyl acetate	MCM-Boosting	2.04512	0.517091
79	Benzaldehyde	25	Ethylbenzene	MCM-Boosting	1.72649	1.2962
79	Benzaldehyde	26	Bromobenzene	MCM-Boosting	1.23493	0.370534
79	Benzaldehyde	27	Chlorobenzene	MCM-Boosting	1.47337	0.538374
79	Benzaldehyde	30	Nitrobenzene	MCM-Boosting	0.470934	0.794622
79	Benzaldehyde	31	Benzene	MCM-Boosting	1.74086	0.274318
79	Benzaldehyde	39	1-Butanol	MCM-Boosting	0.509035	0.265521
79	Benzaldehyde	40	2-Butanone	MCM-Boosting	3.18357	0.403437
79	Benzaldehyde	46	Butyl chloride	MCM-Boosting	2.49499	0.438369
79	Benzaldehyde	47	Chloroform	MCM-Boosting	2.03319	0.199548
79	Benzaldehyde	50	Cyclohexane	MCM-Boosting	1.40946	0.270049
79	Benzaldehyde	60	Decane	MCM-Boosting	1.59469	0.844388
79	Benzaldehyde	72	N,N-Dimethylformamide (DMF)	MCM-Boosting	1.37238	0.640159
79	Benzaldehyde	78	Dodecane	MCM-Boosting	0.685471	0.485979
79	Benzaldehyde	80	Butyl acetate	MCM-Boosting	1.8047	0.251981
79	Benzaldehyde	89	Hexane	MCM-Boosting	3.5907	0.0781867
79	Benzaldehyde	91	Heptane	MCM-Boosting	2.75354	0.0493044
79	Benzaldehyde	97	2,2,4-Trimethylpentane	MCM-Boosting	2.2233	0.576007
79	Benzaldehyde	110	Methanol	MCM-Boosting	1.85755	0.118801
79	Benzaldehyde	112	3-Methylpentane	MCM-Boosting	3.55559	1.52884
79	Benzaldehyde	140	1-Propanol	MCM-Boosting	0.59258	0.1475
79	Benzaldehyde	157	Tetrachloromethane	MCM-Boosting	1.33007	0.0901915
79	Benzaldehyde	161	Toluene	MCM-Boosting	2.04075	0.296655
79	Benzaldehyde	174	Water	MCM-Boosting	0.844235	0.210418
79	Benzaldehyde	250	Cyclohexanone	MCM-Boosting	0.615455	1.32627
79	Benzaldehyde	282	1,2-Propanediol	MCM-Boosting	0.029678	0.254061
79	Benzaldehyde	284	N-Methyl-2-pyrrolidone	MCM-Boosting	0.593999	0.243779
79	Benzaldehyde	297	Hexafluorobenzene	MCM-Boosting	1.3285	0.275701
79	Benzaldehyde	367	2,3-Dimethylbutane	MCM-Boosting	2.79807	0.912153
79	Benzaldehyde	430	Methyl isopropyl ketone	MCM-Boosting	2.15543	0.336096
79	Benzaldehyde	451	Carbonic acid dimethyl ester	MCM-Boosting	1.75885	0.360577
79	Benzaldehyde	516	Hexadecane	MCM-Boosting	0.28584	0.665386
79	Benzaldehyde	887	Deuterium oxide <Heavy water>	MCM-Boosting	0.709399	0.118106
79	Benzaldehyde	982	Perdeuteromethanol	MCM-Boosting	1.52713	0.254984
79	Benzaldehyde	1090	2,2-Dimethylpentane	MCM-Boosting	2.27184	1.16416
79	Benzaldehyde	3410	1,3,5-Triisopropylbenzene	MCM-Boosting	0.361939	0.43918
79	Benzaldehyde	4331	Hexamethyltetracosane	MCM-Boosting	0.0265333	2.93438
79	Benzaldehyde	16447	1-Ethyl-3-methylimidazolium bis(trifluoromethylsulfonyl)imide	MCM-Boosting	0.0536995	0.523967
79	Benzaldehyde	16583	1-Butyl-3-methylimidazolium bis(trifluoromethylsulfonyl)imide	MCM-Boosting	0.0201837	1.99629
79	Benzaldehyde	16810	1-Octyl-3-methylimidazolium tetrafluoroborate	MCM-Boosting	0.00688195	0.715277
79	Benzaldehyde	18162	1-Hexyl-3-methylimidazolium bis(trifluoromethylsulfonyl)imide	MCM-Boosting	0.0344045	0.305261
79	Benzaldehyde	18174	1-Hexyl-3-methylimidazolium tetrafluoroborate	MCM-Boosting	0.00820602	0.630996
79	Benzaldehyde	18642	1-Ethyl-3-methylimidazolium bis(pentafluoroethylsulfonyl)imide	MCM-Boosting	0.0339014	1.74987
79	Benzaldehyde	18988	1-Ethyl-3-methylimidazolium trifluoromethylsulfonate	MCM-Boosting	0.0451578	1.02366
79	Benzaldehyde	20138	1-Butyl-3-methylimidazolium dicyanamide	MCM-Boosting	0.015915	3.23753
79	Benzaldehyde	22417	1-Ethyl-3-methylimidazolium trifluoroacetate	MCM-Boosting	0.055125	0.681617
79	Benzaldehyde	22674	1-Butyl-3-methylpyridinium tetrafluoroborate	MCM-Boosting	0.011918	0.63607
80	Butyl acetate	3	Acetonitrile	MCM-Boosting	2.738	0.145017
80	Butyl acetate	4	Acetone	MCM-Boosting	3.75999	0.187705
80	Butyl acetate	11	Ethanol	MCM-Boosting	1.06736	0.202113
80	Butyl acetate	12	Diethyl ether	MCM-Boosting	4.24646	0.491436
80	Butyl acetate	21	Ethyl acetate	MCM-Boosting	1.76632	0.549913
80	Butyl acetate	25	Ethylbenzene	MCM-Boosting	1.50708	1.83179
80	Butyl acetate	26	Bromobenzene	MCM-Boosting	1.27565	0.312985
80	Butyl acetate	27	Chlorobenzene	MCM-Boosting	1.56483	0.566103
80	Butyl acetate	30	Nitrobenzene	MCM-Boosting	0.400749	0.991914
80	Butyl acetate	31	Benzene	MCM-Boosting	1.56733	0.18331
80	Butyl acetate	39	1-Butanol	MCM-Boosting	0.561809	0.31178
80	Butyl acetate	40	2-Butanone	MCM-Boosting	3.35119	0.370838
80	Butyl acetate	46	Butyl chloride	MCM-Boosting	2.34239	0.397922
80	Butyl acetate	47	Chloroform	MCM-Boosting	1.9694	0.15689
80	Butyl acetate	50	Cyclohexane	MCM-Boosting	1.38849	0.276183
80	Butyl acetate	60	Decane	MCM-Boosting	1.67191	0.468116
80	Butyl acetate	72	N,N-Dimethylformamide (DMF)	MCM-Boosting	1.35465	0.368283
80	Butyl acetate	78	Dodecane	MCM-Boosting	0.571542	0.912483
80	Butyl acetate	80	Butyl acetate	MCM-Boosting	1.80211	0.20895
80	Butyl acetate	89	Hexane	MCM-Boosting	3.53289	0.0908333
80	Butyl acetate	91	Heptane	MCM-Boosting	2.65178	0.056894
80	Butyl acetate	97	2,2,4-Trimethylpentane	MCM-Boosting	2.15437	0.679997
80	Butyl acetate	110	Methanol	MCM-Boosting	1.92239	0.177652
80	Butyl acetate	112	3-Methylpentane	MCM-Boosting	3.26474	2.6274
80	Butyl acetate	140	1-Propanol	MCM-Boosting	0.627606	0.215116
80	Butyl acetate	157	Tetrachloromethane	MCM-Boosting	1.28359	0.100916
80	Butyl acetate	161	Toluene	MCM-Boosting	1.83565	0.223956
80	Butyl acetate	174	Water	MCM-Boosting	0.858597	0.120246
80	Butyl acetate	250	Cyclohexanone	MCM-Boosting	0.553015	2.52827
80	Butyl acetate	282	1,2-Propanediol	MCM-Boosting	0.0327428	0.258803
80	Butyl acetate	284	N-Methyl-2-pyrrolidone	MCM-Boosting	0.584981	0.174226
80	Butyl acetate	297	Hexafluorobenzene	MCM-Boosting	1.2491	0.214813
80	Butyl acetate	367	2,3-Dimethylbutane	MCM-Boosting	2.62813	1.54887
80	Butyl acetate	430	Methyl isopropyl ketone	MCM-Boosting	2.32513	0.225484
80	Butyl acetate	451	Carbonic acid dimethyl ester	MCM-Boosting	1.6098	0.600023
80	Butyl acetate	516	Hexadecane	MCM-Boosting	0.223109	1.23197
80	Butyl acetate	887	Deuterium oxide <Heavy water>	MCM-Boosting	0.667415	0.150767
80	Butyl acetate	982	Perdeuteromethanol	MCM-Boosting	1.39997	0.234775
80	Butyl acetate	1090	2,2-Dimethylpentane	MCM-Boosting	2.17024	2.71224
80	Butyl acetate	3410	1,3,5-Triisopropylbenzene	MCM-Boosting	0.323226	0.68468
80	Butyl acetate	4331	Hexamethyltetracosane	MCM-Boosting	0.017308	6.09667
80	Butyl acetate	16447	1-Ethyl-3-methylimidazolium bis(trifluoromethylsulfonyl)imide	MCM-Boosting	0.0626102	0.485409
80	Butyl acetate	16583	1-Butyl-3-methylimidazolium bis(trifluoromethylsulfonyl)imide	MCM-Boosting	0.0142927	2.10415
80	Butyl acetate	16810	1-Octyl-3-methylimidazolium tetrafluoroborate	MCM-Boosting	0.00953924	0.700898
80	Butyl acetate	18162	1-Hexyl-3-methylimidazolium bis(trifluoromethylsulfonyl)imide	MCM-Boosting	0.0398092	0.384398
80	Butyl acetate	18174	1-Hexyl-3-methylimidazolium tetrafluoroborate	MCM-Boosting	0.0108041	0.864698
80	Butyl acetate	18642	1-Ethyl-3-methylimidazolium bis(pentafluoroethylsulfonyl)imide	MCM-Boosting	0.0375397	0.457267
80	Butyl acetate	18988	1-Ethyl-3-methylimidazolium trifluoromethylsulfonate	MCM-Boosting	0.0525551	0.452901
80	Butyl acetate	20138	1-Butyl-3-methylimidazolium dicyanamide	MCM-Boosting	0.00926742	12.958
80	Butyl acetate	22417	1-Ethyl-3-methylimidazolium trifluoroacetate	MCM-Boosting	0.0616119	0.356006
80	Butyl acetate	22674	1-Butyl-3-methylpyridinium tetrafluoroborate	MCM-Boosting	0.0150354	0.593657
84	Acetic acid	3	Acetonitrile	MCM-Boosting	3.3122	0.160973
84	Acetic acid	4	Acetone	MCM-Boosting	3.62298	0.189571
84	Acetic acid	11	Ethanol	MCM-Boosting	0.952374	0.157806
84	Acetic acid	12	Diethyl ether	MCM-Boosting	5.78944	0.407381
84	Acetic acid	21	Ethyl acetate	MCM-Boosting	3.90654	0.363971
84	Acetic acid	25	Ethylbenzene	MCM-Boosting	2.28024	1.55891
84	Acetic acid	26	Bromobenzene	MCM-Boosting	1.35015	0.366513
84	Acetic acid	27	Chlorobenzene	MCM-Boosting	2.06531	0.401795
84	Acetic acid	30	Nitrobenzene	MCM-Boosting	0.98131	0.371448
84	Acetic acid	31	Benzene	MCM-Boosting	2.05422	0.26452
84	Acetic acid	39	1-Butanol	MCM-Boosting	0.396925	0.428535
84	Acetic acid	40	2-Butanone	MCM-Boosting	2.57956	0.717392
84	Acetic acid	46	Butyl chloride	MCM-Boosting	3.2493	0.359872
84	Acetic acid	47	Chloroform	MCM-Boosting	2.87612	0.16073
84	Acetic acid	50	Cyclohexane	MCM-Boosting	1.17957	0.360365
84	Acetic acid	60	Decane	MCM-Boosting	1.56229	0.963203
84	Acetic acid	72	N,N-Dimethylformamide (DMF)	MCM-Boosting	1.53221	0.905434
84	Acetic acid	78	Dodecane	MCM-Boosting	1.51839	0.229351
84	Acetic acid	80	Butyl acetate	MCM-Boosting	1.96061	0.320949
84	Acetic acid	89	Hexane	MCM-Boosting	4.62053	0.074051
84	Acetic acid	91	Heptane	MCM-Boosting	3.63866	0.0489467
84	Acetic acid	97	2,2,4-Trimethylpentane	MCM-Boosting	3.25875	0.415837
84	Acetic acid	110	Methanol	MCM-Boosting	1.81507	0.128345
84	Acetic acid	112	3-Methylpentane	MCM-Boosting	4.99728	0.78626
84	Acetic acid	140	1-Propanol	MCM-Boosting	0.546659	0.176598
84	Acetic acid	157	Tetrachloromethane	MCM-Boosting	1.69548	0.0888846
84	Acetic acid	161	Toluene	MCM-Boosting	2.18017	0.316824
84	Acetic acid	174	Water	MCM-Boosting	1.22988	0.153877
84	Acetic acid	250	Cyclohexanone	MCM-Boosting	0.538856	1.49925
84	Acetic acid	282	1,2-Propanediol	MCM-Boosting	0.0286427	0.318662
84	Acetic acid	284	N-Methyl-2-pyrrolidone	MCM-Boosting	0.709817	0.23258
84	Acetic acid	297	Hexafluorobenzene	MCM-Boosting	1.97649	0.204623
84	Acetic acid	367	2,3-Dimethylbutane	MCM-Boosting	3.76418	0.847049
84	Acetic acid	430	Methyl isopropyl ketone	MCM-Boosting	2.35105	0.351045
84	Acetic acid	451	Carbonic acid dimethyl ester	MCM-Boosting	2.47681	0.313259
84	Acetic acid	516	Hexadecane	MCM-Boosting	0.86927	0.234151
84	Acetic acid	887	Deuterium oxide <Heavy water>	MCM-Boosting	0.96722	0.0988883
84	Acetic acid	982	Perdeuteromethanol	MCM-Boosting	1.73581	0.266827
84	Acetic acid	1090	2,2-Dimethylpentane	MCM-Boosting	2.95496	1.19995
84	Acetic acid	3410	1,3,5-Triisopropylbenzene	MCM-Boosting	0.453626	0.397056
84	Acetic acid	4331	Hexamethyltetracosane	MCM-Boosting	0.143166	0.812662
84	Acetic acid	16447	1-Ethyl-3-methylimidazolium bis(trifluoromethylsulfonyl)imide	MCM-Boosting	0.0355127	0.927959
84	Acetic acid	16583	1-Butyl-3-methylimidazolium bis(trifluoromethylsulfonyl)imide	MCM-Boosting	0.0629918	0.587547
84	Acetic acid	16810	1-Octyl-3-methylimidazolium tetrafluoroborate	MCM-Boosting	0.00308788	3.78496
84	Acetic acid	18162	1-Hexyl-3-methylimidazolium bis(trifluoromethylsulfonyl)imide	MCM-Boosting	0.0226995	0.510149
84	Acetic acid	18174	1-Hexyl-3-methylimidazolium tetrafluoroborate	MCM-Boosting	0.00345599	11.8675
84	Acetic acid	18642	1-Ethyl-3-methylimidazolium bis(pentafluoroethylsulfonyl)imide	MCM-Boosting	0.0262418	0.820199
84	Acetic acid	18988	1-Ethyl-3-methylimidazolium trifluoromethylsulfonate	MCM-Boosting	0.0325333	1.63265
84	Acetic acid	20138	1-Butyl-3-methylimidazolium dicyanamide	MCM-Boosting	0.120245	0.509001
84	Acetic acid	22417	1-Ethyl-3-methylimidazolium trifluoroacetate	MCM-Boosting	0.0482199	0.792487
84	Acetic acid	22674	1-Butyl-3-methylpyridinium tetrafluoroborate	MCM-Boosting	0.00605135	1.54031
85	Furfural	3	Acetonitrile	MCM-Boosting	2.77575	0.252855
85	Furfural	4	Acetone	MCM-Boosting	3.19575	0.456355
85	Furfural	11	Ethanol	MCM-Boosting	0.863445	0.479377
85	Furfural	12	Diethyl ether	MCM-Boosting	4.5342	0.740222
85	Furfural	21	Ethyl acetate	MCM-Boosting	2.64413	0.827281
85	Furfural	25	Ethylbenzene	MCM-Boosting	1.60211	3.84498
85	Furfural	26	Bromobenzene	MCM-Boosting	1.16214	0.644971
85	Furfural	27	Chlorobenzene	MCM-Boosting	1.85858	0.710295
85	Furfural	30	Nitrobenzene	MCM-Boosting	0.621054	1.0818
85	Furfural	31	Benzene	MCM-Boosting	1.45427	0.335871
85	Furfural	39	1-Butanol	MCM-Boosting	0.377698	1.0881
85	Furfural	40	2-Butanone	MCM-Boosting	2.35231	1.31079
85	Furfural	46	Butyl chloride	MCM-Boosting	2.44251	0.7095
85	Furfural	47	Chloroform	MCM-Boosting	2.27315	0.212962
85	Furfural	50	Cyclohexane	MCM-Boosting	0.972243	0.77656
85	Furfural	60	Decane	MCM-Boosting	1.38488	1.90222
85	Furfural	72	N,N-Dimethylformamide (DMF)	MCM-Boosting	1.22479	1.0292
85	Furfural	78	Dodecane	MCM-Boosting	0.949524	0.857771
85	Furfural	80	Butyl acetate	MCM-Boosting	1.62395	0.560855
85	Furfural	89	Hexane	MCM-Boosting	3.71608	0.135886
85	Furfural	91	Heptane	MCM-Boosting	2.84358	0.0830522
85	Furfural	97	2,2,4-Trimethylpentane	MCM-Boosting	2.51327	1.33904
85	Furfural	110	Methanol	MCM-Boosting	1.61168	0.386507
85	Furfural	112	3-Methylpentane	MCM-Boosting	3.8726	3.91602
85	Furfural	140	1-Propanol	MCM-Boosting	0.49606	0.532345
85	Furfural	157	Tetrachloromethane	MCM-Boosting	1.32627	0.152071
85	Furfural	161	Toluene	MCM-Boosting	1.58703	0.45354
85	Furfural	174	Water	MCM-Boosting	1.05531	0.146937
85	Furfural	250	Cyclohexanone	MCM-Boosting	0.365704	39.2149
85	Furfural	282	1,2-Propanediol	MCM-Boosting	0.0270021	0.653511
85	Furfural	284	N-Methyl-2-pyrrolidone	MCM-Boosting	0.569441	0.352397
85	Furfural	297	Hexafluorobenzene	MCM-Boosting	1.4812	0.319146
85	Furfural	367	2,3-Dimethylbutane	MCM-Boosting	2.89754	4.0503
85	Furfural	430	Methyl isopropyl ketone	MCM-Boosting	2.06164	0.546108
85	Furfural	451	Carbonic acid dimethyl ester	MCM-Boosting	1.89682	0.5753
85	Furfural	516	Hexadecane	MCM-Boosting	0.505985	1.33363
85	Furfural	887	Deuterium oxide <Heavy water>	MCM-Boosting	0.766738	0.168358
85	Furfural	982	Perdeuteromethanol	MCM-Boosting	1.28964	0.414187
85	Furfural	1090	2,2-Dimethylpentane	MCM-Boosting	2.20229	6.17893
85	Furfural	3410	1,3,5-Triisopropylbenzene	MCM-Boosting	0.313489	0.904824
85	Furfural	4331	Hexamethyltetracosane	MCM-Boosting	0.0633984	10.7418
85	Furfural	16447	1-Ethyl-3-methylimidazolium bis(trifluoromethylsulfonyl)imide	MCM-Boosting	0.0370032	2.1371
85	Furfural	16583	1-Butyl-3-methylimidazolium bis(trifluoromethylsulfonyl)imide	MCM-Boosting	0.0327217	2.6357
85	Furfural	16810	1-Octyl-3-methylimidazolium tetrafluoroborate	MCM-Boosting	0.00384974	6.77365
85	Furfural	18162	1-Hexyl-3-methylimidazolium bis(trifluoromethylsulfonyl)imide	MCM-Boosting	0.0226372	1.65328
85	Furfural	18174	1-Hexyl-3-methylimidazolium tetrafluoroborate	MCM-Boosting	0.00412687	8.54199
85	Furfural	18642	1-Ethyl-3-methylimidazolium bis(pentafluoroethylsulfonyl)imide	MCM-Boosting	0.0248916	2.07458
85	Furfural	18988	1-Ethyl-3-methylimidazolium trifluoromethylsulfonate	MCM-Boosting	0.0338172	2.26799
85	Furfural	20138	1-Butyl-3-methylimidazolium dicyanamide	MCM-Boosting	0.0461583	15.2961
85	Furfural	22417	1-Ethyl-3-methylimidazolium trifluoroacetate	MCM-Boosting	0.0456219	1.26367
85	Furfural	22674	1-Butyl-3-methylpyridinium tetrafluoroborate	MCM-Boosting	0.00702544	4.71539
89	Hexane	3	Acetonitrile	MCM-Boosting	2.62166	0.100729
89	Hexane	4	Acetone	MCM-Boosting	2.85179	0.112993
89	Hexane	11	Ethanol	MCM-Boosting	0.753661	0.0929885
89	Hexane	12	Diethyl ether	MCM-Boosting	4.83342	0.274129
89	Hexane	21	Ethyl acetate	MCM-Boosting	3.30799	0.151267
89	Hexane	25	Ethylbenzene	MCM-Boosting	1.95862	0.617821
89	Hexane	26	Bromobenzene	MCM-Boosting	1.04374	0.28173
89	Hexane	27	Chlorobenzene	MCM-Boosting	1.42269	0.347307
89	Hexane	30	Nitrobenzene	MCM-Boosting	0.859237	0.204814
89	Hexane	31	Benzene	MCM-Boosting	1.94436	0.1004
89	Hexane	39	1-Butanol	MCM-Boosting	0.314553	0.226665
89	Hexane	40	2-Butanone	MCM-Boosting	2.15473	0.311797
89	Hexane	46	Butyl chloride	MCM-Boosting	2.71654	0.232094
89	Hexane	47	Chloroform	MCM-Boosting	2.23719	0.0991117
89	Hexane	50	Cyclohexane	MCM-Boosting	1.06823	0.157817
89	Hexane	60	Decane	MCM-Boosting	1.21389	0.375529
89	Hexane	72	N,N-Dimethylformamide (DMF)	MCM-Boosting	1.21621	0.328273
89	Hexane	78	Dodecane	MCM-Boosting	1.32365	0.125913
89	Hexane	80	Butyl acetate	MCM-Boosting	1.59867	0.155021
89	Hexane	89	Hexane	MCM-Boosting	3.69681	0.0591867
89	Hexane	91	Heptane	MCM-Boosting	2.96965	0.0362922
89	Hexane	97	2,2,4-Trimethylpentane	MCM-Boosting	2.5726	0.303625
89	Hexane	110	Methanol	MCM-Boosting	1.46899	0.0770335
89	Hexane	112	3-Methylpentane	MCM-Boosting	4.04671	0.653358
89	Hexane	140	1-Propanol	MCM-Boosting	0.433417	0.0984778
89	Hexane	157	Tetrachloromethane	MCM-Boosting	1.38223	0.065252
89	Hexane	161	Toluene	MCM-Boosting	2.09058	0.131269
89	Hexane	174	Water	MCM-Boosting	0.913864	0.0692824
89	Hexane	250	Cyclohexanone	MCM-Boosting	0.5636	0.736423
89	Hexane	282	1,2-Propanediol	MCM-Boosting	0.0207721	0.209688
89	Hexane	284	N-Methyl-2-pyrrolidone	MCM-Boosting	0.582172	0.11516
89	Hexane	297	Hexafluorobenzene	MCM-Boosting	1.62001	0.121166
89	Hexane	367	2,3-Dimethylbutane	MCM-Boosting	3.25527	0.517978
89	Hexane	430	Methyl isopropyl ketone	MCM-Boosting	1.77446	0.175565
89	Hexane	451	Carbonic acid dimethyl ester	MCM-Boosting	2.04878	0.256338
89	Hexane	516	Hexadecane	MCM-Boosting	0.728809	0.11575
89	Hexane	887	Deuterium oxide <Heavy water>	MCM-Boosting	0.810934	0.079688
89	Hexane	982	Perdeuteromethanol	MCM-Boosting	1.63646	0.142603
89	Hexane	1090	2,2-Dimethylpentane	MCM-Boosting	2.56685	0.753194
89	Hexane	3410	1,3,5-Triisopropylbenzene	MCM-Boosting	0.42228	0.308654
89	Hexane	4331	Hexamethyltetracosane	MCM-Boosting	0.139719	0.147868
89	Hexane	16447	1-Ethyl-3-methylimidazolium bis(trifluoromethylsulfonyl)imide	MCM-Boosting	0.0257215	0.41296
89	Hexane	16583	1-Butyl-3-methylimidazolium bis(trifluoromethylsulfonyl)imide	MCM-Boosting	0.0600728	0.165533
89	Hexane	16810	1-Octyl-3-methylimidazolium tetrafluoroborate	MCM-Boosting	0.00212098	0.677799
89	Hexane	18162	1-Hexyl-3-methylimidazolium bis(trifluoromethylsulfonyl)imide	MCM-Boosting	0.0170876	0.257819
89	Hexane	18174	1-Hexyl-3-methylimidazolium tetrafluoroborate	MCM-Boosting	0.0024508	0.717452
89	Hexane	18642	1-Ethyl-3-methylimidazolium bis(pentafluoroethylsulfonyl)imide	MCM-Boosting	0.0199735	0.324869
89	Hexane	18988	1-Ethyl-3-methylimidazolium trifluoromethylsulfonate	MCM-Boosting	0.0241603	0.383417
89	Hexane	20138	1-Butyl-3-methylimidazolium dicyanamide	MCM-Boosting	0.123381	0.127813
89	Hexane	22417	1-Ethyl-3-methylimidazolium trifluoroacetate	MCM-Boosting	0.0363907	0.279619
89	Hexane	22674	1-Butyl-3-methylpyridinium tetrafluoroborate	MCM-Boosting	0.00438723	0.5878
91	Heptane	3	Acetonitrile	MCM-Boosting	2.65952	0.0561615
91	Heptane	4	Acetone	MCM-Boosting	3.27328	0.0534248
91	Heptane	11	Ethanol	MCM-Boosting	0.902483	0.0432187
91	Heptane	12	Diethyl ether	MCM-Boosting	4.57188	0.115711
91	Heptane	21	Ethyl acetate	MCM-Boosting	2.38302	0.127495
91	Heptane	25	Ethylbenzene	MCM-Boosting	1.78401	0.20413
91	Heptane	26	Bromobenzene	MCM-Boosting	1.14699	0.0965075
91	Heptane	27	Chlorobenzene	MCM-Boosting	1.39989	0.115758
91	Heptane	30	Nitrobenzene	MCM-Boosting	0.583042	0.147252
91	Heptane	31	Benzene	MCM-Boosting	1.84528	0.0540467
91	Heptane	39	1-Butanol	MCM-Boosting	0.429258	0.0900033
91	Heptane	40	2-Butanone	MCM-Boosting	2.76974	0.126253
91	Heptane	46	Butyl chloride	MCM-Boosting	2.55307	0.109729
91	Heptane	47	Chloroform	MCM-Boosting	2.06006	0.060115
91	Heptane	50	Cyclohexane	MCM-Boosting	1.2987	0.0664683
91	Heptane	60	Decane	MCM-Boosting	1.43561	0.174848
91	Heptane	72	N,N-Dimethylformamide (DMF)	MCM-Boosting	1.27433	0.17373
91	Heptane	78	Dodecane	MCM-Boosting	0.86619	0.092364
91	Heptane	80	Butyl acetate	MCM-Boosting	1.71449	0.0826016
91	Heptane	89	Hexane	MCM-Boosting	3.59262	0.0228196
91	Heptane	91	Heptane	MCM-Boosting	2.80733	0.014794
91	Heptane	97	2,2,4-Trimethylpentane	MCM-Boosting	2.31861	0.122032
91	Heptane	110	Methanol	MCM-Boosting	1.69858	0.0358404
91	Heptane	112	3-Methylpentane	MCM-Boosting	3.65967	0.189594
91	Heptane	140	1-Propanol	MCM-Boosting	0.526297	0.045771
91	Heptane	157	Tetrachloromethane	MCM-Boosting	1.33673	0.0259886
91	Heptane	161	Toluene	MCM-Boosting	2.10221	0.0622149
91	Heptane	174	Water	MCM-Boosting	0.842777	0.0450081
91	Heptane	250	Cyclohexanone	MCM-Boosting	0.617018	0.16325
91	Heptane	282	1,2-Propanediol	MCM-Boosting	0.0254996	0.0891394
91	Heptane	284	N-Methyl-2-pyrrolidone	MCM-Boosting	0.586248	0.0695604
91	Heptane	297	Hexafluorobenzene	MCM-Boosting	1.42076	0.0718715
91	Heptane	367	2,3-Dimethylbutane	MCM-Boosting	2.95652	0.180816
91	Heptane	430	Methyl isopropyl ketone	MCM-Boosting	1.9998	0.104985
91	Heptane	451	Carbonic acid dimethyl ester	MCM-Boosting	1.82928	0.0938691
91	Heptane	516	Hexadecane	MCM-Boosting	0.388408	0.132112
91	Heptane	887	Deuterium oxide <Heavy water>	MCM-Boosting	0.734006	0.0330082
91	Heptane	982	Perdeuteromethanol	MCM-Boosting	1.59011	0.0536007
91	Heptane	1090	2,2-Dimethylpentane	MCM-Boosting	2.40696	0.184586
91	Heptane	3410	1,3,5-Triisopropylbenzene	MCM-Boosting	0.387668	0.0861121
91	Heptane	4331	Hexamethyltetracosane	MCM-Boosting	0.047713	0.281362
91	Heptane	16447	1-Ethyl-3-methylimidazolium bis(trifluoromethylsulfonyl)imide	MCM-Boosting	0.0411525	0.172178
91	Heptane	16583	1-Butyl-3-methylimidazolium bis(trifluoromethylsulfonyl)imide	MCM-Boosting	0.0294515	0.22222
91	Heptane	16810	1-Octyl-3-methylimidazolium tetrafluoroborate	MCM-Boosting	0.00462932	0.201411
91	Heptane	18162	1-Hexyl-3-methylimidazolium bis(trifluoromethylsulfonyl)imide	MCM-Boosting	0.0266842	0.104193
91	Heptane	18174	1-Hexyl-3-methylimidazolium tetrafluoroborate	MCM-Boosting	0.00534043	0.211574
91	Heptane	18642	1-Ethyl-3-methylimidazolium bis(pentafluoroethylsulfonyl)imide	MCM-Boosting	0.027944	0.178817
91	Heptane	18988	1-Ethyl-3-methylimidazolium trifluoromethylsulfonate	MCM-Boosting	0.0360963	0.180301
91	Heptane	20138	1-Butyl-3-methylimidazolium dicyanamide	MCM-Boosting	0.0323262	0.317282
91	Heptane	22417	1-Ethyl-3-methylimidazolium trifluoroacetate	MCM-Boosting	0.0475846	0.169105
91	Heptane	22674	1-Butyl-3-methylpyridinium tetrafluoroborate	MCM-Boosting	0.00830803	0.204388
99	Methyl iodide	3	Acetonitrile	MCM-Boosting	3.15904	0.363884
99	Methyl iodide	4	Acetone	MCM-Boosting	4.95403	0.257376
99	Methyl iodide	11	Ethanol	MCM-Boosting	1.43787	0.144007
99	Methyl iodide	12	Diethyl ether	MCM-Boosting	3.93642	3.49099
99	Methyl iodide	21	Ethyl acetate	MCM-Boosting	1.09209	4.01811
99	Methyl iodide	25	Ethylbenzene	MCM-Boosting	1.09054	272.958
99	Methyl iodide	26	Bromobenzene	MCM-Boosting	1.62115	0.957968
99	Methyl iodide	27	Chlorobenzene	MCM-Boosting	2.68478	1.02045
99	Methyl iodide	30	Nitrobenzene	MCM-Boosting	0.201668	9.99521
99	Methyl iodide	31	Benzene	MCM-Boosting	0.871365	0.600493
99	Methyl iodide	39	1-Butanol	MCM-Boosting	0.815085	0.384773
99	Methyl iodide	40	2-Butanone	MCM-Boosting	4.00812	1.14609
99	Methyl iodide	46	Butyl chloride	MCM-Boosting	1.90142	2.05749
99	Methyl iodide	47	Chloroform	MCM-Boosting	2.07851	0.435057
99	Methyl iodide	50	Cyclohexane	MCM-Boosting	1.14716	0.455011
99	Methyl iodide	60	Decane	MCM-Boosting	2.08452	4.08488
99	Methyl iodide	72	N,N-Dimethylformamide (DMF)	MCM-Boosting	1.41384	5.15093
99	Methyl iodide	78	Dodecane	MCM-Boosting	0.291388	4.08486
99	Methyl iodide	80	Butyl acetate	MCM-Boosting	1.88323	0.604313
99	Methyl iodide	89	Hexane	MCM-Boosting	3.61117	0.171111
99	Methyl iodide	91	Heptane	MCM-Boosting	2.44787	0.123097
99	Methyl iodide	97	2,2,4-Trimethylpentane	MCM-Boosting	2.04084	3.58843
99	Methyl iodide	110	Methanol	MCM-Boosting	2.364	0.141936
99	Methyl iodide	112	3-Methylpentane	MCM-Boosting	3.04328	44.0774
99	Methyl iodide	140	1-Propanol	MCM-Boosting	0.842085	0.153645
99	Methyl iodide	157	Tetrachloromethane	MCM-Boosting	1.19835	0.221168
99	Methyl iodide	161	Toluene	MCM-Boosting	1.01641	0.745384
99	Methyl iodide	174	Water	MCM-Boosting	1.19654	0.108517
99	Methyl iodide	250	Cyclohexanone	MCM-Boosting	0.243967	68.1474
99	Methyl iodide	282	1,2-Propanediol	MCM-Boosting	0.0594257	0.284386
99	Methyl iodide	284	N-Methyl-2-pyrrolidone	MCM-Boosting	0.561859	0.617657
99	Methyl iodide	297	Hexafluorobenzene	MCM-Boosting	1.04148	1.07539
99	Methyl iodide	367	2,3-Dimethylbutane	MCM-Boosting	1.99886	15.5316
99	Methyl iodide	430	Methyl isopropyl ketone	MCM-Boosting	3.32988	0.623906
99	Methyl iodide	451	Carbonic acid dimethyl ester	MCM-Boosting	1.40878	2.26083
99	Methyl iodide	516	Hexadecane	MCM-Boosting	0.107374	3.94298
99	Methyl iodide	887	Deuterium oxide <Heavy water>	MCM-Boosting	0.601307	0.352805
99	Methyl iodide	982	Perdeuteromethanol	MCM-Boosting	0.856687	0.766775
99	Methyl iodide	1090	2,2-Dimethylpentane	MCM-Boosting	1.57087	47.3161
99	Methyl iodide	3410	1,3,5-Triisopropylbenzene	MCM-Boosting	0.17191	3.24007
99	Methyl iodide	4331	Hexamethyltetracosane	MCM-Boosting	0.00338711	440.106
99	Methyl iodide	16447	1-Ethyl-3-methylimidazolium bis(trifluoromethylsulfonyl)imide	MCM-Boosting	0.129777	1.1634
99	Methyl iodide	16583	1-Butyl-3-methylimidazolium bis(trifluoromethylsulfonyl)imide	MCM-Boosting	0.00418633	50.9617
99	Methyl iodide	16810	1-Octyl-3-methylimidazolium tetrafluoroborate	MCM-Boosting	0.032366	1.38022
99	Methyl iodide	18162	1-Hexyl-3-methylimidazolium bis(trifluoromethylsulfonyl)imide	MCM-Boosting	0.0740417	0.28278
99	Methyl iodide	18174	1-Hexyl-3-methylimidazolium tetrafluoroborate	MCM-Boosting	0.0330107	3.48315
99	Methyl iodide	18642	1-Ethyl-3-methylimidazolium bis(pentafluoroethylsulfonyl)imide	MCM-Boosting	0.0574081	1.45371
99	Methyl iodide	18988	1-Ethyl-3-methylimidazolium trifluoromethylsulfonate	MCM-Boosting	0.106643	1.73175
99	Methyl iodide	20138	1-Butyl-3-methylimidazolium dicyanamide	MCM-Boosting	0.00125963	305.281
99	Methyl iodide	22417	1-Ethyl-3-methylimidazolium trifluoroacetate	MCM-Boosting	0.101508	1.84101
99	Methyl iodide	22674	1-Butyl-3-methylpyridinium tetrafluoroborate	MCM-Boosting	0.0417883	1.37111
108	1-Methylnaphthalene	3	Acetonitrile	MCM-Boosting	2.51011	0.318904
108	1-Methylnaphthalene	4	Acetone	MCM-Boosting	3.39099	0.266077
108	1-Methylnaphthalene	11	Ethanol	MCM-Boosting	0.969154	0.170225
108	1-Methylnaphthalene	12	Diethyl ether	MCM-Boosting	4.05971	0.882666
108	1-Methylnaphthalene	21	Ethyl acetate	MCM-Boosting	1.56682	1.83863
108	1-Methylnaphthalene	25	Ethylbenzene	MCM-Boosting	1.42497	8.98451
108	1-Methylnaphthalene	26	Bromobenzene	MCM-Boosting	1.12054	0.729938
108	1-Methylnaphthalene	27	Chlorobenzene	MCM-Boosting	1.41503	0.948793
108	1-Methylnaphthalene	30	Nitrobenzene	MCM-Boosting	0.369505	5.28244
108	1-Methylnaphthalene	31	Benzene	MCM-Boosting	1.41602	0.615426
108	1-Methylnaphthalene	39	1-Butanol	MCM-Boosting	0.515182	0.469372
108	1-Methylnaphthalene	40	2-Butanone	MCM-Boosting	3.02378	1.5049
108	1-Methylnaphthalene	46	Butyl chloride	MCM-Boosting	2.06518	1.20872
108	1-Methylnaphthalene	47	Chloroform	MCM-Boosting	1.74178	0.485412
108	1-Methylnaphthalene	50	Cyclohexane	MCM-Boosting	1.2736	0.518982
108	1-Methylnaphthalene	60	Decane	MCM-Boosting	1.48655	48.4561
108	1-Methylnaphthalene	72	N,N-Dimethylformamide (DMF)	MCM-Boosting	1.22213	20.4201
108	1-Methylnaphthalene	78	Dodecane	MCM-Boosting	0.503636	1.07544
108	1-Methylnaphthalene	80	Butyl acetate	MCM-Boosting	1.61742	0.851381
108	1-Methylnaphthalene	89	Hexane	MCM-Boosting	3.17756	0.127572
108	1-Methylnaphthalene	91	Heptane	MCM-Boosting	2.38371	0.0862131
108	1-Methylnaphthalene	97	2,2,4-Trimethylpentane	MCM-Boosting	1.89779	1.23037
108	1-Methylnaphthalene	110	Methanol	MCM-Boosting	1.75144	0.158868
108	1-Methylnaphthalene	112	3-Methylpentane	MCM-Boosting	3.17793	4.90567
108	1-Methylnaphthalene	140	1-Propanol	MCM-Boosting	0.56433	0.187987
108	1-Methylnaphthalene	157	Tetrachloromethane	MCM-Boosting	1.15369	0.152402
108	1-Methylnaphthalene	161	Toluene	MCM-Boosting	1.66417	0.730707
108	1-Methylnaphthalene	174	Water	MCM-Boosting	0.78013	0.397826
108	1-Methylnaphthalene	250	Cyclohexanone	MCM-Boosting	0.498981	7.28796
108	1-Methylnaphthalene	282	1,2-Propanediol	MCM-Boosting	0.0292384	1.07282
108	1-Methylnaphthalene	284	N-Methyl-2-pyrrolidone	MCM-Boosting	0.523188	0.427639
108	1-Methylnaphthalene	297	Hexafluorobenzene	MCM-Boosting	1.10137	0.599745
108	1-Methylnaphthalene	367	2,3-Dimethylbutane	MCM-Boosting	2.43047	3.96791
108	1-Methylnaphthalene	430	Methyl isopropyl ketone	MCM-Boosting	2.1	0.765509
108	1-Methylnaphthalene	451	Carbonic acid dimethyl ester	MCM-Boosting	1.46547	0.798885
108	1-Methylnaphthalene	516	Hexadecane	MCM-Boosting	0.202106	1.71655
108	1-Methylnaphthalene	887	Deuterium oxide <Heavy water>	MCM-Boosting	0.610291	0.204799
108	1-Methylnaphthalene	982	Perdeuteromethanol	MCM-Boosting	1.27543	0.554302
108	1-Methylnaphthalene	1090	2,2-Dimethylpentane	MCM-Boosting	1.97836	6.25589
108	1-Methylnaphthalene	3410	1,3,5-Triisopropylbenzene	MCM-Boosting	0.289556	0.909576
108	1-Methylnaphthalene	4331	Hexamethyltetracosane	MCM-Boosting	0.0152704	19.2595
108	1-Methylnaphthalene	16447	1-Ethyl-3-methylimidazolium bis(trifluoromethylsulfonyl)imide	MCM-Boosting	0.05744	1.9053
108	1-Methylnaphthalene	16583	1-Butyl-3-methylimidazolium bis(trifluoromethylsulfonyl)imide	MCM-Boosting	0.0122916	15.5801
108	1-Methylnaphthalene	16810	1-Octyl-3-methylimidazolium tetrafluoroborate	MCM-Boosting	0.00832344	2.43399
108	1-Methylnaphthalene	18162	1-Hexyl-3-methylimidazolium bis(trifluoromethylsulfonyl)imide	MCM-Boosting	0.0361696	0.459656
108	1-Methylnaphthalene	18174	1-Hexyl-3-methylimidazolium tetrafluoroborate	MCM-Boosting	0.00913752	4.06334
108	1-Methylnaphthalene	18642	1-Ethyl-3-methylimidazolium bis(pentafluoroethylsulfonyl)imide	MCM-Boosting	0.0331613	1.43286
108	1-Methylnaphthalene	18988	1-Ethyl-3-methylimidazolium trifluoromethylsulfonate	MCM-Boosting	0.0477389	19.1022
108	1-Methylnaphthalene	20138	1-Butyl-3-methylimidazolium dicyanamide	MCM-Boosting	0.00857156	20.5246
108	1-Methylnaphthalene	22417	1-Ethyl-3-methylimidazolium trifluoroacetate	MCM-Boosting	0.0547509	5.6413
108	1-Methylnaphthalene	22674	1-Butyl-3-methylpyridinium tetrafluoroborate	MCM-Boosting	0.0133228	2.34285
110	Methanol	3	Acetonitrile	MCM-Boosting	4.36216	0.174819
110	Methanol	4	Acetone	MCM-Boosting	4.62674	0.201464
110	Methanol	11	Ethanol	MCM-Boosting	1.18913	0.173171
110	Methanol	12	Diethyl ether	MCM-Boosting	8.23598	0.47601
110	Methanol	21	Ethyl acetate	MCM-Boosting	6.18768	0.249614
110	Methanol	25	Ethylbenzene	MCM-Boosting	3.38962	1.29503
110	Methanol	26	Bromobenzene	MCM-Boosting	1.75477	0.483984
110	Methanol	27	Chlorobenzene	MCM-Boosting	2.56147	0.531317
110	Methanol	30	Nitrobenzene	MCM-Boosting	1.65449	0.310676
110	Methanol	31	Benzene	MCM-Boosting	3.22822	0.211509
110	Methanol	39	1-Butanol	MCM-Boosting	0.481232	0.459938
110	Methanol	40	2-Butanone	MCM-Boosting	3.33371	0.620944
110	Methanol	46	Butyl chloride	MCM-Boosting	4.72412	0.405068
110	Methanol	47	Chloroform	MCM-Boosting	4.00896	0.149789
110	Methanol	50	Cyclohexane	MCM-Boosting	1.66108	0.363092
110	Methanol	60	Decane	MCM-Boosting	2.01355	0.746167
110	Methanol	72	N,N-Dimethylformamide (DMF)	MCM-Boosting	2.03935	0.524785
110	Methanol	78	Dodecane	MCM-Boosting	2.60718	0.182656
110	Methanol	80	Butyl acetate	MCM-Boosting	2.67439	0.286086
110	Methanol	89	Hexane	MCM-Boosting	6.36884	0.0917792
110	Methanol	91	Heptane	MCM-Boosting	5.15902	0.0524147
110	Methanol	97	2,2,4-Trimethylpentane	MCM-Boosting	4.63932	0.486985
110	Methanol	110	Methanol	MCM-Boosting	2.30783	0.142491
110	Methanol	112	3-Methylpentane	MCM-Boosting	7.05599	1.37443
110	Methanol	140	1-Propanol	MCM-Boosting	0.686697	0.189906
110	Methanol	157	Tetrachloromethane	MCM-Boosting	2.41096	0.10131
110	Methanol	161	Toluene	MCM-Boosting	3.44859	0.258545
110	Methanol	174	Water	MCM-Boosting	1.54111	0.141445
110	Methanol	250	Cyclohexanone	MCM-Boosting	0.89099	2.04091
110	Methanol	282	1,2-Propanediol	MCM-Boosting	0.0336787	0.380028
110	Methanol	284	N-Methyl-2-pyrrolidone	MCM-Boosting	0.987542	0.19233
110	Methanol	297	Hexafluorobenzene	MCM-Boosting	2.93594	0.207552
110	Methanol	367	2,3-Dimethylbutane	MCM-Boosting	5.71526	0.958107
110	Methanol	430	Methyl isopropyl ketone	MCM-Boosting	2.92075	0.314525
110	Methanol	451	Carbonic acid dimethyl ester	MCM-Boosting	3.59559	0.362941
110	Methanol	516	Hexadecane	MCM-Boosting	1.5485	0.18643
110	Methanol	887	Deuterium oxide <Heavy water>	MCM-Boosting	1.34902	0.114665
110	Methanol	982	Perdeuteromethanol	MCM-Boosting	2.63163	0.258987
110	Methanol	1090	2,2-Dimethylpentane	MCM-Boosting	4.39417	1.30349
110	Methanol	3410	1,3,5-Triisopropylbenzene	MCM-Boosting	0.741357	0.500125
110	Methanol	4331	Hexamethyltetracosane	MCM-Boosting	0.334712	0.287371
110	Methanol	16447	1-Ethyl-3-methylimidazolium bis(trifluoromethylsulfonyl)imide	MCM-Boosting	0.0403601	0.837846
110	Methanol	16583	1-Butyl-3-methylimidazolium bis(trifluoromethylsulfonyl)imide	MCM-Boosting	0.128737	0.388165
110	Methanol	16810	1-Octyl-3-methylimidazolium tetrafluoroborate	MCM-Boosting	0.00306815	2.33284
110	Methanol	18162	1-Hexyl-3-methylimidazolium bis(trifluoromethylsulfonyl)imide	MCM-Boosting	0.0266665	0.590687
110	Methanol	18174	1-Hexyl-3-methylimidazolium tetrafluoroborate	MCM-Boosting	0.00341932	2.45222
110	Methanol	18642	1-Ethyl-3-methylimidazolium bis(pentafluoroethylsulfonyl)imide	MCM-Boosting	0.0320337	0.833072
110	Methanol	18988	1-Ethyl-3-methylimidazolium trifluoromethylsulfonate	MCM-Boosting	0.038065	0.979569
110	Methanol	20138	1-Butyl-3-methylimidazolium dicyanamide	MCM-Boosting	0.313029	0.230324
110	Methanol	22417	1-Ethyl-3-methylimidazolium trifluoroacetate	MCM-Boosting	0.0585104	0.755078
110	Methanol	22674	1-Butyl-3-methylpyridinium tetrafluoroborate	MCM-Boosting	0.00638931	1.46077
112	3-Methylpentane	3	Acetonitrile	MCM-Boosting	2.9057	0.806914
112	3-Methylpentane	4	Acetone	MCM-Boosting	3.42863	0.492062
112	3-Methylpentane	11	Ethanol	MCM-Boosting	0.930542	0.476675
112	3-Methylpentane	12	Diethyl ether	MCM-Boosting	4.902	1.0437
112	3-Methylpentane	21	Ethyl acetate	MCM-Boosting	2.65687	2.88831
112	3-Methylpentane	25	Ethylbenzene	MCM-Boosting	1.82343	25.2542
112	3-Methylpentane	26	Bromobenzene	MCM-Boosting	1.19398	1.87815
112	3-Methylpentane	27	Chlorobenzene	MCM-Boosting	1.61158	1.40435
112	3-Methylpentane	30	Nitrobenzene	MCM-Boosting	0.652451	2.7227
112	3-Methylpentane	31	Benzene	MCM-Boosting	1.81002	0.597661
112	3-Methylpentane	39	1-Butanol	MCM-Boosting	0.419996	1.45126
112	3-Methylpentane	40	2-Butanone	MCM-Boosting	2.73515	3.46059
112	3-Methylpentane	46	Butyl chloride	MCM-Boosting	2.71449	1.37197
112	3-Methylpentane	47	Chloroform	MCM-Boosting	2.31821	0.460945
112	3-Methylpentane	50	Cyclohexane	MCM-Boosting	1.23349	0.915361
112	3-Methylpentane	60	Decane	MCM-Boosting	1.47333	6.11328
112	3-Methylpentane	72	N,N-Dimethylformamide (DMF)	MCM-Boosting	1.27765	6.91867
112	3-Methylpentane	78	Dodecane	MCM-Boosting	1.02038	0.95474
112	3-Methylpentane	80	Butyl acetate	MCM-Boosting	1.78934	0.812555
112	3-Methylpentane	89	Hexane	MCM-Boosting	3.88629	0.157457
112	3-Methylpentane	91	Heptane	MCM-Boosting	3.02667	0.092384
112	3-Methylpentane	97	2,2,4-Trimethylpentane	MCM-Boosting	2.634	2.08581
112	3-Methylpentane	110	Methanol	MCM-Boosting	1.74381	0.396078
112	3-Methylpentane	112	3-Methylpentane	MCM-Boosting	3.97976	24.0794
112	3-Methylpentane	140	1-Propanol	MCM-Boosting	0.539801	0.519361
112	3-Methylpentane	157	Tetrachloromethane	MCM-Boosting	1.42405	0.176968
112	3-Methylpentane	161	Toluene	MCM-Boosting	2.01342	0.769356
112	3-Methylpentane	174	Water	MCM-Boosting	0.978604	0.385767
112	3-Methylpentane	250	Cyclohexanone	MCM-Boosting	0.537116	9.72292
112	3-Methylpentane	282	1,2-Propanediol	MCM-Boosting	0.0276882	1.08711
112	3-Methylpentane	284	N-Methyl-2-pyrrolidone	MCM-Boosting	0.620479	0.645566
112	3-Methylpentane	297	Hexafluorobenzene	MCM-Boosting	1.57076	0.8228
112	3-Methylpentane	367	2,3-Dimethylbutane	MCM-Boosting	3.28112	3.70981
112	3-Methylpentane	430	Methyl isopropyl ketone	MCM-Boosting	2.07225	0.997857
112	3-Methylpentane	451	Carbonic acid dimethyl ester	MCM-Boosting	1.94898	0.869672
112	3-Methylpentane	516	Hexadecane	MCM-Boosting	0.490025	1.94895
112	3-Methylpentane	887	Deuterium oxide <Heavy water>	MCM-Boosting	0.80042	0.206682
112	3-Methylpentane	982	Perdeuteromethanol	MCM-Boosting	1.55636	0.669885
112	3-Methylpentane	1090	2,2-Dimethylpentane	MCM-Boosting	2.373	7.73599
112	3-Methylpentane	3410	1,3,5-Triisopropylbenzene	MCM-Boosting	0.38672	1.10822
112	3-Methylpentane	4331	Hexamethyltetracosane	MCM-Boosting	0.0639386	57.5283
112	3-Methylpentane	16447	1-Ethyl-3-methylimidazolium bis(trifluoromethylsulfonyl)imide	MCM-Boosting	0.0395276	10.5416
112	3-Methylpentane	16583	1-Butyl-3-methylimidazolium bis(trifluoromethylsulfonyl)imide	MCM-Boosting	0.0328826	33.3767
112	3-Methylpentane	16810	1-Octyl-3-methylimidazolium tetrafluoroborate	MCM-Boosting	0.00418691	15.5564
112	3-Methylpentane	18162	1-Hexyl-3-methylimidazolium bis(trifluoromethylsulfonyl)imide	MCM-Boosting	0.0261742	1.75512
112	3-Methylpentane	18174	1-Hexyl-3-methylimidazolium tetrafluoroborate	MCM-Boosting	0.00460921	26.254
112	3-Methylpentane	18642	1-Ethyl-3-methylimidazolium bis(pentafluoroethylsulfonyl)imide	MCM-Boosting	0.0298188	4.94456
112	3-Methylpentane	18988	1-Ethyl-3-methylimidazolium trifluoromethylsulfonate	MCM-Boosting	0.0372565	6.358
112	3-Methylpentane	20138	1-Butyl-3-methylimidazolium dicyanamide	MCM-Boosting	0.0441855	46.9568
112	3-Methylpentane	22417	1-Ethyl-3-methylimidazolium trifluoroacetate	MCM-Boosting	0.0489113	5.81092
112	3-Methylpentane	22674	1-Butyl-3-methylpyridinium tetrafluoroborate	MCM-Boosting	0.00784451	15.4932
123	Naphthalene	3	Acetonitrile	MCM-Boosting	2.58079	0.172499
123	Naphthalene	4	Acetone	MCM-Boosting	3.37774	0.1731
123	Naphthalene	11	Ethanol	MCM-Boosting	0.957967	0.159765
123	Naphthalene	12	Diethyl ether	MCM-Boosting	4.03777	0.452051
123	Naphthalene	21	Ethyl acetate	MCM-Boosting	1.78396	0.609737
123	Naphthalene	25	Ethylbenzene	MCM-Boosting	1.44614	2.70147
123	Naphthalene	26	Bromobenzene	MCM-Boosting	1.15507	0.323686
123	Naphthalene	27	Chlorobenzene	MCM-Boosting	1.55116	0.379737
123	Naphthalene	30	Nitrobenzene	MCM-Boosting	0.398553	0.827658
123	Naphthalene	31	Benzene	MCM-Boosting	1.38275	0.226147
123	Naphthalene	39	1-Butanol	MCM-Boosting	0.480442	0.282968
123	Naphthalene	40	2-Butanone	MCM-Boosting	2.82756	0.462123
123	Naphthalene	46	Butyl chloride	MCM-Boosting	2.1704	0.391473
123	Naphthalene	47	Chloroform	MCM-Boosting	1.91806	0.161456
123	Naphthalene	50	Cyclohexane	MCM-Boosting	1.16165	0.264049
123	Naphthalene	60	Decane	MCM-Boosting	1.46671	0.639794
123	Naphthalene	72	N,N-Dimethylformamide (DMF)	MCM-Boosting	1.22187	0.662008
123	Naphthalene	78	Dodecane	MCM-Boosting	0.588738	0.511216
123	Naphthalene	80	Butyl acetate	MCM-Boosting	1.62767	0.246104
123	Naphthalene	89	Hexane	MCM-Boosting	3.3254	0.0808398
123	Naphthalene	91	Heptane	MCM-Boosting	2.49392	0.0513148
123	Naphthalene	97	2,2,4-Trimethylpentane	MCM-Boosting	2.0573	0.608537
123	Naphthalene	110	Methanol	MCM-Boosting	1.73426	0.140773
123	Naphthalene	112	3-Methylpentane	MCM-Boosting	3.20225	2.18749
123	Naphthalene	140	1-Propanol	MCM-Boosting	0.557131	0.170834
123	Naphthalene	157	Tetrachloromethane	MCM-Boosting	1.19071	0.0941733
123	Naphthalene	161	Toluene	MCM-Boosting	1.58447	0.281344
123	Naphthalene	174	Water	MCM-Boosting	0.868277	0.141492
123	Naphthalene	250	Cyclohexanone	MCM-Boosting	0.453169	1.58247
123	Naphthalene	282	1,2-Propanediol	MCM-Boosting	0.0301491	0.239221
123	Naphthalene	284	N-Methyl-2-pyrrolidone	MCM-Boosting	0.536172	0.211066
123	Naphthalene	297	Hexafluorobenzene	MCM-Boosting	1.19385	0.235441
123	Naphthalene	367	2,3-Dimethylbutane	MCM-Boosting	2.48288	0.995047
123	Naphthalene	430	Methyl isopropyl ketone	MCM-Boosting	2.1316	0.308836
123	Naphthalene	451	Carbonic acid dimethyl ester	MCM-Boosting	1.5563	0.440248
123	Naphthalene	516	Hexadecane	MCM-Boosting	0.24757	0.792286
123	Naphthalene	887	Deuterium oxide <Heavy water>	MCM-Boosting	0.649677	0.126824
123	Naphthalene	982	Perdeuteromethanol	MCM-Boosting	1.24285	0.257202
123	Naphthalene	1090	2,2-Dimethylpentane	MCM-Boosting	1.945	1.65918
123	Naphthalene	3410	1,3,5-Triisopropylbenzene	MCM-Boosting	0.28536	0.526087
123	Naphthalene	4331	Hexamethyltetracosane	MCM-Boosting	0.0205475	3.58773
123	Naphthalene	16447	1-Ethyl-3-methylimidazolium bis(trifluoromethylsulfonyl)imide	MCM-Boosting	0.0511238	0.747592
123	Naphthalene	16583	1-Butyl-3-methylimidazolium bis(trifluoromethylsulfonyl)imide	MCM-Boosting	0.0153543	1.73733
123	Naphthalene	16810	1-Octyl-3-methylimidazolium tetrafluoroborate	MCM-Boosting	0.00734738	0.71012
123	Naphthalene	18162	1-Hexyl-3-methylimidazolium bis(trifluoromethylsulfonyl)imide	MCM-Boosting	0.0323026	0.37386
123	Naphthalene	18174	1-Hexyl-3-methylimidazolium tetrafluoroborate	MCM-Boosting	0.00798668	0.888508
123	Naphthalene	18642	1-Ethyl-3-methylimidazolium bis(pentafluoroethylsulfonyl)imide	MCM-Boosting	0.031187	0.70383
123	Naphthalene	18988	1-Ethyl-3-methylimidazolium trifluoromethylsulfonate	MCM-Boosting	0.0449587	0.535011
123	Naphthalene	20138	1-Butyl-3-methylimidazolium dicyanamide	MCM-Boosting	0.0120627	4.74911
123	Naphthalene	22417	1-Ethyl-3-methylimidazolium trifluoroacetate	MCM-Boosting	0.05355	0.509204
123	Naphthalene	22674	1-Butyl-3-methylpyridinium tetrafluoroborate	MCM-Boosting	0.0122768	0.549877
129	1-Octene	3	Acetonitrile	MCM-Boosting	2.83742	0.1788
129	1-Octene	4	Acetone	MCM-Boosting	4.14508	0.133513
129	1-Octene	11	Ethanol	MCM-Boosting	1.20382	0.0721004
129	1-Octene	12	Diethyl ether	MCM-Boosting	4.46778	0.537426
129	1-Octene	21	Ethyl acetate	MCM-Boosting	1.63627	0.612938
129	1-Octene	25	Ethylbenzene	MCM-Boosting	1.60407	2.09029
129	1-Octene	26	Bromobenzene	MCM-Boosting	1.3843	0.35296
129	1-Octene	27	Chlorobenzene	MCM-Boosting	1.50228	0.663282
129	1-Octene	30	Nitrobenzene	MCM-Boosting	0.360825	1.14486
129	1-Octene	31	Benzene	MCM-Boosting	1.71462	0.268971
129	1-Octene	39	1-Butanol	MCM-Boosting	0.667288	0.174852
129	1-Octene	40	2-Butanone	MCM-Boosting	3.94366	0.372503
129	1-Octene	46	Butyl chloride	MCM-Boosting	2.47608	0.51367
129	1-Octene	47	Chloroform	MCM-Boosting	1.97181	0.271478
129	1-Octene	50	Cyclohexane	MCM-Boosting	1.67677	0.195488
129	1-Octene	60	Decane	MCM-Boosting	1.81208	0.892642
129	1-Octene	72	N,N-Dimethylformamide (DMF)	MCM-Boosting	1.42675	0.702316
129	1-Octene	78	Dodecane	MCM-Boosting	0.513598	0.565374
129	1-Octene	80	Butyl acetate	MCM-Boosting	1.93124	0.293331
129	1-Octene	89	Hexane	MCM-Boosting	3.65164	0.0958374
129	1-Octene	91	Heptane	MCM-Boosting	2.72874	0.0643302
129	1-Octene	97	2,2,4-Trimethylpentane	MCM-Boosting	2.16597	0.694732
129	1-Octene	110	Methanol	MCM-Boosting	2.14538	0.0715266
129	1-Octene	112	3-Methylpentane	MCM-Boosting	3.43332	1.71306
129	1-Octene	140	1-Propanol	MCM-Boosting	0.710668	0.0822694
129	1-Octene	157	Tetrachloromethane	MCM-Boosting	1.33426	0.106874
129	1-Octene	161	Toluene	MCM-Boosting	2.0657	0.305067
129	1-Octene	174	Water	MCM-Boosting	0.828418	0.213257
129	1-Octene	250	Cyclohexanone	MCM-Boosting	0.663488	2.15124
129	1-Octene	282	1,2-Propanediol	MCM-Boosting	0.0366346	0.1991
129	1-Octene	284	N-Methyl-2-pyrrolidone	MCM-Boosting	0.62491	0.212882
129	1-Octene	297	Hexafluorobenzene	MCM-Boosting	1.26156	0.268607
129	1-Octene	367	2,3-Dimethylbutane	MCM-Boosting	2.7155	1.65189
129	1-Octene	430	Methyl isopropyl ketone	MCM-Boosting	2.47885	0.322009
129	1-Octene	451	Carbonic acid dimethyl ester	MCM-Boosting	1.62775	0.574118
129	1-Octene	516	Hexadecane	MCM-Boosting	0.182526	0.775508
129	1-Octene	887	Deuterium oxide <Heavy water>	MCM-Boosting	0.668679	0.159031
129	1-Octene	982	Perdeuteromethanol	MCM-Boosting	1.52338	0.298129
129	1-Octene	1090	2,2-Dimethylpentane	MCM-Boosting	2.30245	1.90755
129	1-Octene	3410	1,3,5-Triisopropylbenzene	MCM-Boosting	0.346668	0.700292
129	1-Octene	4331	Hexamethyltetracosane	MCM-Boosting	0.0117117	5.86178
129	1-Octene	16447	1-Ethyl-3-methylimidazolium bis(trifluoromethylsulfonyl)imide	MCM-Boosting	0.0819787	0.34764
129	1-Octene	16583	1-Butyl-3-methylimidazolium bis(trifluoromethylsulfonyl)imide	MCM-Boosting	0.0117669	2.39748
129	1-Octene	16810	1-Octyl-3-methylimidazolium tetrafluoroborate	MCM-Boosting	0.0134949	0.288142
129	1-Octene	18162	1-Hexyl-3-methylimidazolium bis(trifluoromethylsulfonyl)imide	MCM-Boosting	0.0502907	0.180502
129	1-Octene	18174	1-Hexyl-3-methylimidazolium tetrafluoroborate	MCM-Boosting	0.0160712	0.35666
129	1-Octene	18642	1-Ethyl-3-methylimidazolium bis(pentafluoroethylsulfonyl)imide	MCM-Boosting	0.0459918	0.360266
129	1-Octene	18988	1-Ethyl-3-methylimidazolium trifluoromethylsulfonate	MCM-Boosting	0.0645385	0.491224
129	1-Octene	20138	1-Butyl-3-methylimidazolium dicyanamide	MCM-Boosting	0.00581411	5.08763
129	1-Octene	22417	1-Ethyl-3-methylimidazolium trifluoroacetate	MCM-Boosting	0.0698336	1.02808
129	1-Octene	22674	1-Butyl-3-methylpyridinium tetrafluoroborate	MCM-Boosting	0.0204995	1.0357
138	Phenol	3	Acetonitrile	MCM-Boosting	2.85524	0.128918
138	Phenol	4	Acetone	MCM-Boosting	3.48981	0.135632
138	Phenol	11	Ethanol	MCM-Boosting	0.945564	0.118397
138	Phenol	12	Diethyl ether	MCM-Boosting	4.7182	0.293057
138	Phenol	21	Ethyl acetate	MCM-Boosting	2.42615	0.351715
138	Phenol	25	Ethylbenzene	MCM-Boosting	1.68638	0.726295
138	Phenol	26	Bromobenzene	MCM-Boosting	1.21921	0.237642
138	Phenol	27	Chlorobenzene	MCM-Boosting	1.77304	0.22851
138	Phenol	30	Nitrobenzene	MCM-Boosting	0.576987	0.474945
138	Phenol	31	Benzene	MCM-Boosting	1.57075	0.185828
138	Phenol	39	1-Butanol	MCM-Boosting	0.436299	0.254992
138	Phenol	40	2-Butanone	MCM-Boosting	2.70019	0.381791
138	Phenol	46	Butyl chloride	MCM-Boosting	2.54504	0.297819
138	Phenol	47	Chloroform	MCM-Boosting	2.26117	0.130834
138	Phenol	50	Cyclohexane	MCM-Boosting	1.12465	0.240998
138	Phenol	60	Decane	MCM-Boosting	1.48865	0.636433
138	Phenol	72	N,N-Dimethylformamide (DMF)	MCM-Boosting	1.31	0.703008
138	Phenol	78	Dodecane	MCM-Boosting	0.867396	0.278484
138	Phenol	80	Butyl acetate	MCM-Boosting	1.74536	0.223787
138	Phenol	89	Hexane	MCM-Boosting	3.80025	0.0541064
138	Phenol	91	Heptane	MCM-Boosting	2.89983	0.035977
138	Phenol	97	2,2,4-Trimethylpentane	MCM-Boosting	2.49088	0.301809
138	Phenol	110	Methanol	MCM-Boosting	1.75082	0.100986
138	Phenol	112	3-Methylpentane	MCM-Boosting	3.76052	0.588798
138	Phenol	140	1-Propanol	MCM-Boosting	0.548905	0.126125
138	Phenol	157	Tetrachloromethane	MCM-Boosting	1.36752	0.0661323
138	Phenol	161	Toluene	MCM-Boosting	1.74073	0.221911
138	Phenol	174	Water	MCM-Boosting	1.02066	0.101576
138	Phenol	250	Cyclohexanone	MCM-Boosting	0.448584	0.966636
138	Phenol	282	1,2-Propanediol	MCM-Boosting	0.0294455	0.188073
138	Phenol	284	N-Methyl-2-pyrrolidone	MCM-Boosting	0.590654	0.176219
138	Phenol	297	Hexafluorobenzene	MCM-Boosting	1.47759	0.19716
138	Phenol	367	2,3-Dimethylbutane	MCM-Boosting	2.86404	0.529301
138	Phenol	430	Methyl isopropyl ketone	MCM-Boosting	2.21884	0.237462
138	Phenol	451	Carbonic acid dimethyl ester	MCM-Boosting	1.88875	0.234897
138	Phenol	516	Hexadecane	MCM-Boosting	0.423148	0.344609
138	Phenol	887	Deuterium oxide <Heavy water>	MCM-Boosting	0.761423	0.0773397
138	Phenol	982	Perdeuteromethanol	MCM-Boosting	1.38352	0.181963
138	Phenol	1090	2,2-Dimethylpentane	MCM-Boosting	2.2679	0.662582
138	Phenol	3410	1,3,5-Triisopropylbenzene	MCM-Boosting	0.333072	0.281791
138	Phenol	4331	Hexamethyltetracosane	MCM-Boosting	0.0466058	0.997993
138	Phenol	16447	1-Ethyl-3-methylimidazolium bis(trifluoromethylsulfonyl)imide	MCM-Boosting	0.044118	0.583807
138	Phenol	16583	1-Butyl-3-methylimidazolium bis(trifluoromethylsulfonyl)imide	MCM-Boosting	0.027309	0.844987
138	Phenol	16810	1-Octyl-3-methylimidazolium tetrafluoroborate	MCM-Boosting	0.00499801	0.635534
138	Phenol	18162	1-Hexyl-3-methylimidazolium bis(trifluoromethylsulfonyl)imide	MCM-Boosting	0.0276362	0.287196
138	Phenol	18174	1-Hexyl-3-methylimidazolium tetrafluoroborate	MCM-Boosting	0.00557271	1.00584
138	Phenol	18642	1-Ethyl-3-methylimidazolium bis(pentafluoroethylsulfonyl)imide	MCM-Boosting	0.0286285	0.506759
138	Phenol	18988	1-Ethyl-3-methylimidazolium trifluoromethylsulfonate	MCM-Boosting	0.0397993	0.512845
138	Phenol	20138	1-Butyl-3-methylimidazolium dicyanamide	MCM-Boosting	0.0314786	1.21356
138	Phenol	22417	1-Ethyl-3-methylimidazolium trifluoroacetate	MCM-Boosting	0.0515613	0.386424
138	Phenol	22674	1-Butyl-3-methylpyridinium tetrafluoroborate	MCM-Boosting	0.00883016	0.594216
140	1-Propanol	3	Acetonitrile	MCM-Boosting	3.19509	0.10652
140	1-Propanol	4	Acetone	MCM-Boosting	3.53448	0.137638
140	1-Propanol	11	Ethanol	MCM-Boosting	0.928374	0.136977
140	1-Propanol	12	Diethyl ether	MCM-Boosting	5.8895	0.267488
140	1-Propanol	21	Ethyl acetate	MCM-Boosting	3.93998	0.182093
140	1-Propanol	25	Ethylbenzene	MCM-Boosting	2.35323	0.729801
140	1-Propanol	26	Bromobenzene	MCM-Boosting	1.29601	0.300338
140	1-Propanol	27	Chlorobenzene	MCM-Boosting	1.77655	0.359736
140	1-Propanol	30	Nitrobenzene	MCM-Boosting	1.02477	0.206934
140	1-Propanol	31	Benzene	MCM-Boosting	2.32108	0.112409
140	1-Propanol	39	1-Butanol	MCM-Boosting	0.392368	0.303832
140	1-Propanol	40	2-Butanone	MCM-Boosting	2.66851	0.359135
140	1-Propanol	46	Butyl chloride	MCM-Boosting	3.31236	0.23826
140	1-Propanol	47	Chloroform	MCM-Boosting	2.76809	0.102747
140	1-Propanol	50	Cyclohexane	MCM-Boosting	1.3046	0.217923
140	1-Propanol	60	Decane	MCM-Boosting	1.5361	0.4145
140	1-Propanol	72	N,N-Dimethylformamide (DMF)	MCM-Boosting	1.5011	0.2974
140	1-Propanol	78	Dodecane	MCM-Boosting	1.58771	0.151711
140	1-Propanol	80	Butyl acetate	MCM-Boosting	1.97578	0.169779
140	1-Propanol	89	Hexane	MCM-Boosting	4.5373	0.0597369
140	1-Propanol	91	Heptane	MCM-Boosting	3.63632	0.0368349
140	1-Propanol	97	2,2,4-Trimethylpentane	MCM-Boosting	3.18708	0.318732
140	1-Propanol	110	Methanol	MCM-Boosting	1.79583	0.112423
140	1-Propanol	112	3-Methylpentane	MCM-Boosting	4.9652	0.686488
140	1-Propanol	140	1-Propanol	MCM-Boosting	0.536163	0.150904
140	1-Propanol	157	Tetrachloromethane	MCM-Boosting	1.70293	0.0679853
140	1-Propanol	161	Toluene	MCM-Boosting	2.50654	0.153004
140	1-Propanol	174	Water	MCM-Boosting	1.10609	0.084758
140	1-Propanol	250	Cyclohexanone	MCM-Boosting	0.673138	0.750686
140	1-Propanol	282	1,2-Propanediol	MCM-Boosting	0.0261629	0.24929
140	1-Propanol	284	N-Methyl-2-pyrrolidone	MCM-Boosting	0.712509	0.128555
140	1-Propanol	297	Hexafluorobenzene	MCM-Boosting	2.00063	0.129029
140	1-Propanol	367	2,3-Dimethylbutane	MCM-Boosting	3.94565	0.614914
140	1-Propanol	430	Methyl isopropyl ketone	MCM-Boosting	2.1951	0.194083
140	1-Propanol	451	Carbonic acid dimethyl ester	MCM-Boosting	2.48729	0.266247
140	1-Propanol	516	Hexadecane	MCM-Boosting	0.864441	0.178973
140	1-Propanol	887	Deuterium oxide <Heavy water>	MCM-Boosting	0.967839	0.0799583
140	1-Propanol	982	Perdeuteromethanol	MCM-Boosting	1.93214	0.155439
140	1-Propanol	1090	2,2-Dimethylpentane	MCM-Boosting	3.1522	0.692624
140	1-Propanol	3410	1,3,5-Triisopropylbenzene	MCM-Boosting	0.509098	0.320084
140	1-Propanol	4331	Hexamethyltetracosane	MCM-Boosting	0.158161	0.280388
140	1-Propanol	16447	1-Ethyl-3-methylimidazolium bis(trifluoromethylsulfonyl)imide	MCM-Boosting	0.0336691	0.507181
140	1-Propanol	16583	1-Butyl-3-methylimidazolium bis(trifluoromethylsulfonyl)imide	MCM-Boosting	0.0709975	0.218518
140	1-Propanol	16810	1-Octyl-3-methylimidazolium tetrafluoroborate	MCM-Boosting	0.00282403	1.03542
140	1-Propanol	18162	1-Hexyl-3-methylimidazolium bis(trifluoromethylsulfonyl)imide	MCM-Boosting	0.0220537	0.392553
140	1-Propanol	18174	1-Hexyl-3-methylimidazolium tetrafluoroborate	MCM-Boosting	0.00321682	1.02206
140	1-Propanol	18642	1-Ethyl-3-methylimidazolium bis(pentafluoroethylsulfonyl)imide	MCM-Boosting	0.0256224	0.40744
140	1-Propanol	18988	1-Ethyl-3-methylimidazolium trifluoromethylsulfonate	MCM-Boosting	0.0315157	0.46713
140	1-Propanol	20138	1-Butyl-3-methylimidazolium dicyanamide	MCM-Boosting	0.13704	0.260211
140	1-Propanol	22417	1-Ethyl-3-methylimidazolium trifluoroacetate	MCM-Boosting	0.0463891	0.347888
140	1-Propanol	22674	1-Butyl-3-methylpyridinium tetrafluoroborate	MCM-Boosting	0.00565065	0.736536
141	Propionic acid	3	Acetonitrile	MCM-Boosting	2.98818	0.147901
141	Propionic acid	4	Acetone	MCM-Boosting	3.36983	0.172606
141	Propionic acid	11	Ethanol	MCM-Boosting	0.897915	0.135996
141	Propionic acid	12	Diethyl ether	MCM-Boosting	5.28032	0.34294
141	Propionic acid	21	Ethyl acetate	MCM-Boosting	3.24298	0.37085
141	Propionic acid	25	Ethylbenzene	MCM-Boosting	2.03494	0.839715
141	Propionic acid	26	Bromobenzene	MCM-Boosting	1.219	0.342575
[truncated: 19,220 more rows]
