# Supplementary material for: Database for liquid phase diffusion coefficients at infinite dilution at 298 K and matrix completion methods for their prediction
Source: Royal Society of Chemistry journal article supplement (doi:10.1039/d2dd00073c), 2022-01-01
Supplement: d2dd00073c3.pdf [file d2dd00073c3.pdf]

## Electronic Supplementary Information (ESI)

Database for liquid phase diffusion coefficients  
at infinite dilution at 298 K and matrix  
completion methods for their prediction

Oliver Großmann, Daniel Bellaire, Nicolas Hayer, Fabian Jirasek, Hans Hasse

Laboratory of Engineering Thermodynamics (LTD), TU Kaiserslautern,  
Erwin-Schrödinger-Straße 44, 67663, Kaiserslautern, Germany

Email: [fabian.jirasek@mv.uni-kl.de](mailto:fabian.jirasek@mv.uni-kl.de)

## Contents

|     |                                                                                         |    |
|-----|-----------------------------------------------------------------------------------------|----|
| S.1 | Data curation . . . . .                                                                 | 1  |
| S.2 | Semiempirical models . . . . .                                                          | 1  |
|     | S.2.1 Wilke and Chang, 1955 . . . . .                                                   | 2  |
|     | S.2.2 Reddy and Doraiswamy, 1967 . . . . .                                              | 2  |
|     | S.2.3 Tyn and Calus, 1975 . . . . .                                                     | 3  |
|     | S.2.4 SEGWE (Stokes-Einstein Gierer-Wirtz Estimation) . . . .                           | 3  |
|     | S.2.5 Effect of fitting the model parameters with a leave-one-out<br>strategy . . . . . | 4  |
|     | S.2.6 Mixtures poorly described by semiempirical models . . . .                         | 4  |
| S.3 | Maximum errors in the predictive performance of the studied<br>models . . . . .         | 7  |
| S.4 | Complete predictions from MCM-Whisky . . . . .                                          | 8  |
| S.5 | Supplementary tabular files . . . . .                                                   | 8  |
| S.6 | Tabular material . . . . .                                                              | 11 |
| S.7 | Stan code . . . . .                                                                     | 21 |
|     | S.7.1 Data-driven MCM . . . . .                                                         | 21 |
|     | S.7.2 MCM-Boosting . . . . .                                                            | 22 |
|     | S.7.3 MCM-Whisky: Distillation . . . . .                                                | 23 |
|     | S.7.4 MCM-Whisky: Maturation . . . . .                                                  | 24 |

## S.1 Data curation

In the following, we describe the criteria that we have applied for deciding whether to adopt a data point to our database or not. First, all data points that were labeled in the Dortmund Data Bank (DDB) to be of poor quality were omitted. Furthermore, we have excluded all solutes and solvents without a well-defined molecular composition, such as polymers and pseudocomponents (e.g. seawater, jet fuel, bitumen). In cases where we found data points to be erroneously labeled in the DDB, e.g., when predicted data was reported as experimental data, or in cases where the reported type of diffusion coefficient was unclear, we have excluded that data as well.

Moreover, the consistency of the reported diffusion coefficients was assessed in two ways. First, for mixtures for which multiple data points at similar concentrations (differences below 0.02 mol/mol) were reported by different authors, those deviating by more than one standard deviation from the mean were excluded. Second, for mixtures for which data points were measured over a range of concentrations, we have removed those data points that deviated more than one standard deviation from the fitted curve describing the concentration dependence of  $D_{ij}$  (cf. description of the fitting procedure in Section 2 of the manuscript).

Going beyond the formal data curation steps described above, we note that the matrix completion methods (MCMs) developed in this work can be used to obtain information on erroneous data: MCMs basically analyze data sets for (hidden) structure, which they will not be able to find in the case of erroneous data; hence, such data points are likely to be outliers in the MCM predictions. Therefore, it is interesting to analyze the outliers in the MCM predictions closer in order to find out whether the deviation might stem from errors in the data. However, this requires applying methods beyond the MCMs and was not in the scope of the present work.

## S.2 Semiempirical models

In this section, the considered semiempirical models studied in the present work are briefly presented. Further, we show exactly how  $D_{ij}^\infty$  is calculated in each of these cases from some pure-component properties of the solutes and solvents. The pure-component properties needed for this purpose were calculated for the studied temperature  $T = 298.15$  K by DIPPR correlations, which are provided in the DIPPR database.<sup>1</sup> For the solutes  $i$  and solvents  $j$ , these include, depending on the model, some combination of the molar masses  $M_i$  and  $M_j$ , the parachors  $P_i$  and  $P_j$ , and the saturated liquid phase molar volumes  $\tilde{v}_i$  and  $\tilde{v}_j$  at the respective normal boiling temperatures of solute and solvent, as well as the viscosity  $\eta_j$  of the solvent.

---

<sup>1</sup> The parachor is used here as defined by Quayle:  $P_i = \sqrt[4]{\gamma_i v_i}$ , where  $\gamma_i$  and  $v_i$  are the surface tension and liquid molar volume of pure component  $i$  at the studied temperature, respectively.<sup>2</sup>

With the exception of SEGWE, the semiempirical models considered here need information on the saturated liquid phase molar volume  $\tilde{v}_i$  of the solute  $i$  at its normal boiling temperature. However, for carbon dioxide this value is not defined since its triple point pressure is above the ambient pressure; therefore, the liquid molar volume at the triple point was used instead here. Similarly, also for perylene and 3-hydroxyaniline  $\tilde{v}_i$  at the normal boiling temperature cannot be measured since both components decompose before reaching the respective temperatures; therefore, we have used a hypothetical value for  $\tilde{v}_i$  for these components, which was calculated with the group contribution method of Schröder.<sup>3</sup>

While the four semiempirical models have been developed as general-purpose correlations that aim at describing a diverse set of mixtures and components, there are still some restrictions in the scope of these models, which we briefly mention here. All authors have limited their models to moderate viscosities and have excluded data for viscous solvents (e.g., polymers) from their training sets. Further, none of the semiempirical models were trained on data of mixtures containing electrolytes, i.e., neither mixtures with salts as solutes nor with ionic liquids as solutes or solvents should be expected to be predicted with high accuracy.

### S.2.1 Wilke and Chang, 1955

One of the first widely applicable correlations for diffusion coefficients in liquids was developed by Wilke and Chang.<sup>4</sup> According to the model of Wilke and Chang,  $D_{ij}^\infty$  is calculated by:

$$\left(\frac{D_{ij}^\infty}{\text{m}^2/\text{s}}\right) = 7.4 \times 10^{-12} \sqrt{\phi_j \left(\frac{M_j}{\text{g/mol}}\right)} \frac{1}{\left(\frac{\tilde{v}_i}{\text{cm}^3/\text{mol}}\right)^{0.6} \left(\frac{\eta_j}{\text{mPa s}}\right)} \left(\frac{T}{\text{K}}\right) \quad (\text{S.1})$$

where  $\phi_j$  is a solvent-specific factor, which was introduced to improve the description of diffusion coefficients in associating solvents; for some common solvents, values for  $\phi_j$  have been reported.<sup>4</sup> However, in this work, values for  $\phi_j$  were fitted for each solvent individually to experimental  $D_{ij}^\infty$  from our database (cf. Section 3.2.4).

### S.2.2 Reddy and Doraiswamy, 1967

Reddy and Doraiswamy sought to improve on the Wilke-Chang correlation by eliminating the factor  $\phi_j$  and considering the molar volume  $\tilde{v}_j$  of the solvent instead.<sup>5</sup> They also changed the exponent of both  $\tilde{v}_i$  and  $\tilde{v}_j$  to  $\frac{1}{3}$ , an idea that was previously introduced by Scheibel,<sup>6</sup> resulting in Equation S.2:

$$\left(\frac{D_{ij}^\infty}{\text{m}^2/\text{s}}\right) = K_{\text{RS}} \frac{\sqrt{\frac{M_j}{\text{g/mol}}}}{\sqrt[3]{\left(\frac{\tilde{v}_i}{\text{cm}^3/\text{mol}}\right) \left(\frac{\tilde{v}_j}{\text{cm}^3/\text{mol}}\right)}} \left(\frac{T}{\text{K}}\right) \left(\frac{\eta_j}{\text{mPa s}}\right). \quad (\text{S.2})$$

The empirical constant  $K_{\text{RS}}$  depends on the ratio of  $\tilde{v}_i$  to  $\tilde{v}_j$ :

$$K_{\text{RS}} = \begin{cases} 10 \times 10^{-12}, & \text{for } \frac{\tilde{v}_j}{\tilde{v}_i} \leq 1.5 \\ 8.5 \times 10^{-12}, & \text{for } \frac{\tilde{v}_j}{\tilde{v}_i} > 1.5 \end{cases} \quad (\text{S.3})$$

### S.2.3 Tyn and Calus, 1975

Tyn and Calus found that the ratio of the parachors  $P_i$  and  $P_j$  correlates strongly with  $D_{ij}^\infty$ ,<sup>7</sup> and therefore proposed the following equation:

$$\left( \frac{D_{ij}^\infty}{\text{m}^2/\text{s}} \right) = 8.93 \times 10^{-12} \sqrt[6]{\frac{\left( \frac{\tilde{v}_i}{\text{cm}^3/\text{mol}} \right)}{\left( \frac{\tilde{v}_j}{\text{cm}^3/\text{mol}} \right)^2}} \left( \frac{P_j}{P_i} \right)^{0.6} \frac{\left( \frac{T}{\text{K}} \right)}{\left( \frac{\eta_j}{\text{mPa s}} \right)}. \quad (\text{S.4})$$

The Tyn and Calus model is subject to the following restrictions:<sup>7</sup>

- For the solute water, the authors suggest that water should be treated as a dimer, i.e., the values of  $\tilde{v}_i$  and  $P_i$  should be doubled. In this work, we have used the values  $\tilde{v}_{\text{water}} = 37.4 \text{ cm}^3/\text{mol}$  and  $P_{\text{water}} = 105.2 \text{ cm}^3 \text{ g}^{1/4}/(\text{s}^{1/2} \text{ mol})$  for the water dimer, as recommended by Poling.<sup>8</sup>
- When the solute is an organic acid, the dimer value of  $2\tilde{v}_i$  and  $2P_i$  should be used in solvents other than water, methanol, and butanol. In the present work, we have followed this suggestion.
- For nonpolar solutes in monohydroxy alcohol solvents, the values of  $\tilde{v}_j$  and  $P_j$  should be multiplied by the factor  $8\eta_j$ , with the solvent viscosity  $\eta_j$  in units of mPa s, which was done accordingly in the present work.

### S.2.4 SEGWE (Stokes-Einstein Gierer-Wirtz Estimation)

In a recent work of Evans et al., the Stokes-Einstein equation<sup>9</sup> was extended by introducing the Gierer-Wirtz<sup>10</sup> correction to loosen the assumption of the Stokes-Einstein theory that the solvent is a continuum fluid.<sup>11</sup> Consequently, they named their model SEGWE (Stokes-Einstein Gierer-Wirtz Estimation), which calculates  $D_{ij}^\infty$  as:

$$D_{ij}^\infty = \frac{k_{\text{B}}}{6\pi} \frac{\left( \frac{3\alpha}{2} + \frac{1}{1+\alpha} \right) T}{\sqrt[3]{\frac{3M_i}{4\pi \varrho_{\text{eff}} N_{\text{A}}}} \eta_j} \quad (\text{S.5})$$

where  $\varrho_{\text{eff}}$  is the effective density and  $\alpha$  is the ratio of the solvent and solute radii,  $r_j$  and  $r_i$ , respectively. Further,  $k_{\text{B}}$  and  $N_{\text{A}}$  are the Boltzmann and Avogadro constants, respectively. Assuming that all molecules are hard spheres,  $\alpha$  can also be expressed in terms of the molar masses  $M_j$  and  $M_i$ :

$$\alpha = \frac{r_j}{r_i} = \sqrt[3]{\frac{M_j}{M_i}}. \quad (\text{S.6})$$

The effective density  $\varrho_{\text{eff}}$ , which can be considered either as a solvent-specific parameter or fitted to a global value, was fitted by the original authors to diffusion coefficient data at 25 °C for 109 combinations of 44 solutes and 5 solvents, yielding a global value of 619 kg/m<sup>3</sup>.<sup>11</sup>

In the present work, we use  $\varrho_{\text{eff}}$  as a solvent-specific parameter, which we have fitted individually to the respective data on  $D_{ij}^\infty$  for each solvent from our database; as described above, we thereby followed a leave-one-out strategy (cf. Section 3.2.4).

### S.2.5 Effect of fitting the model parameters with a leave-one-out strategy

Both the Wilke-Chang and SEGWE models contain a solvent-specific fit parameter, called  $\phi_j$  and  $\varrho_{\text{eff},j}$ , respectively. For a fair comparison to the MCMs, these were fitted to the new database using a leave-one-out strategy in the present work: i.e., for the prediction of each experimental  $D_{ij}^\infty$ , a  $\phi_j^{(i)}$  (or  $\varrho_{\text{eff},j}^{(i)}$ ) was fitted to all available experimental data in that particular solvent *minus* the data point  $i + j$  that is to be predicted. The optimum  $\phi_j^{(i),*}$  was chosen for the minimum in the rRMSE:

$$\phi_j^{(i),*} = \arg \min_{\phi_j^{(i)}} \sum_{k \neq i} \left( \frac{D_{kj}^{\infty, \text{pred}}(\phi_j^{(i)}) - D_{kj}^{\infty, \text{exp}}}{D_{kj}^{\infty, \text{exp}}} \right)^2 \quad (\text{S.7})$$

However, it is also possible to apply the Wilke-Chang and SEGWE models in a purely predictive manner: for Wilke-Chang this means using the (few) parameter values of  $\phi_j$  supplied by the original authors, for SEGWE the global value  $\varrho_{\text{eff}} = 619 \text{ kg/m}^3$  is used.

For both models, there is only a small difference in the overall performance when comparing the purely predictive approach to that with the fitted parameter. The effect is shown in Figure S.1. For SEGWE, the rMAE and rRMSE decrease from 0.213 and 0.285 in the predictive approach to 0.193 and 0.276 in the fitted approach, respectively. For Wilke-Chang, the rMAE decreases from 0.227 to 0.209, while, surprisingly, the rRMSE slightly increases from 0.304 to 0.314. This paradoxical effect is due to the large number of solvents in which data is available only for very little mixtures (i.e. solvents that have been measured in combinations with few solutes). In such cases, the leave-one-out strategy will lead to a good fit of  $\phi_j$  to the (limited) available data, while the left-out point may therefore be grossly mispredicted, resulting in a high rRMSE.

### S.2.6 Mixtures poorly described by semiempirical models

In this section, we take a closer look at those mixtures from our database, for which  $D_{ij}^\infty$  is only poorly described by the semiempirical models, and we try to specify those groups of solutes and solvents for which this is the case. We thereby focus on SEGWE, but also briefly touch upon the other models.

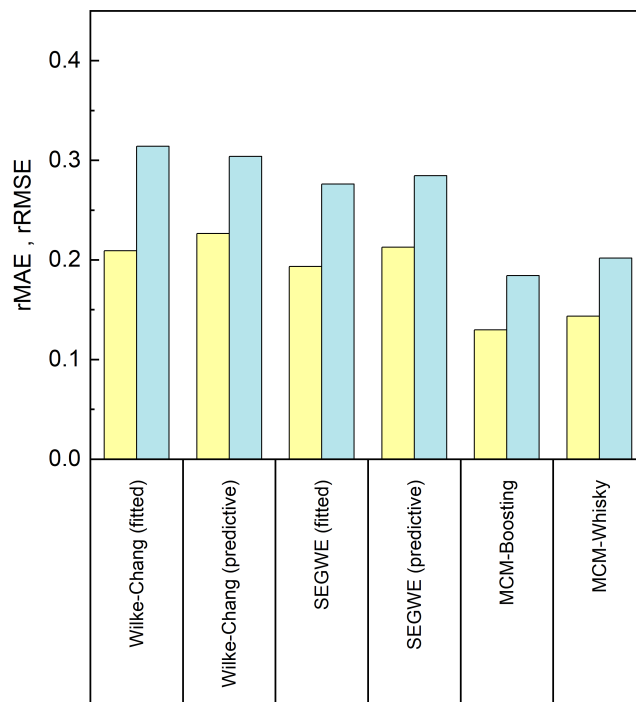

Figure S.1: Relative mean absolute error (rMAE, yellow) and relative root mean-squared error (rRMSE, blue) of the predicted  $D_{ij}^\infty$  for the experimental data from the reduced database. We compare the developed MCMs to the semiempirical models Wilke-Chang and SEGWE in two variants: a purely predictive one and a one that was fitted to the database of this work using a leave-one-out strategy.

For discussing the performance of SEGWE in detail, we refer to Figure 7 in the manuscript, which shows the residuals of the SEGWE predictions from the experimental data. One solute that SEGWE is apparently struggling to describe accurately is water (solute  $i = 27$ , cf. Figure 7). In our reduced database, there are eight mixtures with the solute water; the relative deviations of the SEGWE predictions from the experimental data for  $D_{ij}^\infty$  for these eight mixtures are shown in Figure S.2.

We find the largest positive relative deviations for mixtures in which strong hydrogen bonding occurs, namely the mixtures (water + ethanol) and (water + 1-propanol). Slightly smaller, but still large positive relative deviations are found for mixtures of water with solvents in which weaker hydrogen bonds are formed (acetone, butyl acetate, *N*-methyl-2-pyrrolidone and methyl isopropyl ketone, cf. Figure S.2). This is not astonishing as the developers of SEGWE have explicitly excluded data for mixtures with "aggregating components" in the development of SEGWE.<sup>11</sup> Aggregation leads to lower diffusion coefficients; an effect which is not described by SEGWE, which, as a consequence, overpredicts

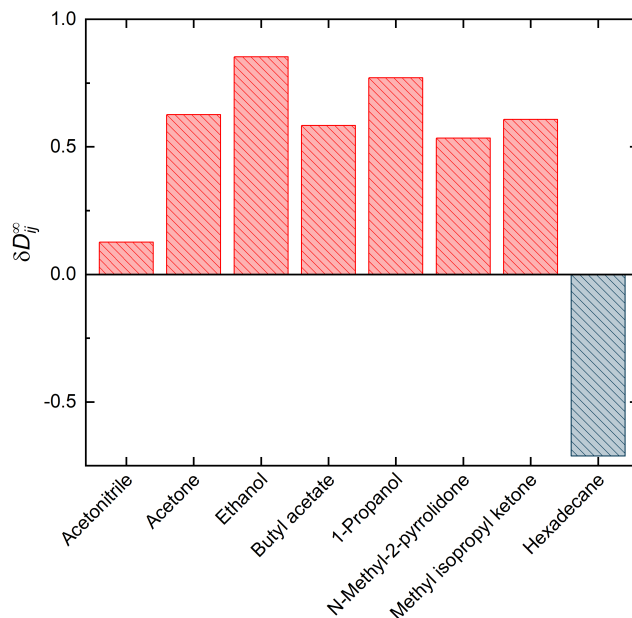

Figure S.2: Relative deviations  $\delta D_{ij}^{\infty} = (D_{ij}^{\infty, \text{pred}} - D_{ij}^{\infty, \text{exp}}) / D_{ij}^{\infty, \text{exp}}$  of the SEGWE predictions for  $D_{ij}^{\infty}$  of the solute water in different solvents from the experimental data from the reduced database.

$D_{ij}^{\infty}$  in such mixtures, cf. Figure S.2.

High positive relative deviations of the SEGWE predictions from the experimental data are also found for many other hydrogen bonding systems in our database.

Furthermore, SEGWE mispredicts  $D_{ij}^{\infty}$  in mixtures where the molecular mass in relation to the molecule size strongly differs between both components. This is in particular the case if one of the components contains heavy atoms, and the other does not. The reason for this is that in the development of SEGWE, it was assumed that both solute and solvent can be modeled as hard spheres, and that both spheres have an equal ratio of mass to volume – the so-called effective density  $\varrho_{\text{eff}}$  of the mixture.

An instructive example for this case is the result for the solute carbon dioxide ( $i = 39$ ) in Figure 7 of the manuscript. Carbon dioxide has a relatively large molecular mass in relation to its small molecular volume, which leads to a rather high effective density compared to, e.g., typical organic solvents. Accordingly, we find SEGWE to significantly underestimate  $D_{ij}^{\infty}$  for basically all mixtures with carbon dioxide from the reduced database (cf. Figure 7 in the manuscript), and even for all mixtures with carbon dioxide from the full database (not shown here).

Two other examples for solutes in our database with rather high effective

densities are methyl iodide ( $i = 19$ ), which is due to the heavy iodine atom, and the fully fluorinated hexafluorobenzene ( $i = 30$ ); we find that SEGWE also underestimates the diffusion in all mixtures containing these two solutes. Returning to Figure S.2 as a last example, we can likewise explain the significant underestimation of the experimental  $D_{ij}^\infty$  in the mixture (water + hexadecane) by the higher effective density of water in relation to that of hexadecane (and the absence of significant attractive forces in the mixture to counteract this effect).

Finally, we briefly touch on the limitations of the models of Wilke and Chang,<sup>4</sup> Reddy and Doraiswamy,<sup>5</sup> and Tyn and Calus.<sup>7</sup> Due to their similar nature they are all subject to similar restrictions, so that they will be discussed together here. Despite the original authors' intention to provide general-purpose correlations that work in nonpolar and polar mixtures alike, all three models have been found to struggle significantly with hydrogen bonding mixtures (as it is also the case for SEGWE). Hence, they overpredict  $D_{ij}^\infty$  for hydrogen bonding solvents, such as methanol, ethanol and 1-propanol. Further, the Wilke-Chang model is inaccurate in the prediction of the diffusion of water in organic solvents, which has been described before in the literature.<sup>12</sup> Accordingly, we find a significant overestimation of  $D_{ij}^\infty$  by the Wilke-Chang model for nearly all mixtures from the reduced database in which water is the solute, with the exception of the mixture (water + hexadecane). This trend is not observed for the models of Tyn and Calus or Reddy and Doraiswamy.

Lastly, we note that MCMs can be used to identify such systematic deviations in the predictions of (semiempirical) models, and that MCMs can also predict them, which is used in the hybrid MCM based on "boosting" for improving the performance of the semiempirical models, cf. Figure 6 in the manuscript.

### S.3 Maximum errors in the predictive performance of the studied models

In Figure S.3, we present the relative maximum absolute error, defined by Equation S.8, of the predictions for  $D_{ij}^\infty$  with the four semiempirical models and the three MCMs studied in this work on the reduced database is shown. We find similar results as in Figure 6 in the manuscript, namely that the performance of the data-driven MCM suffers from some drastic mispredictions (leading to the high relative maximum absolute error seen here), and that both hybrid MCMs outperform the semiempirical models in this statistic too. Again, we find that MCM-Boosting performs slightly better than MCM-Whisky in terms of the relative maximum absolute error.

$$\text{relative maximum absolute error} = \max_{i,j} \left| \frac{D_{ij}^{\infty,\text{pred}} - D_{ij}^{\infty,\text{exp}}}{D_{ij}^{\infty,\text{exp}}} \right| \quad (\text{S.8})$$

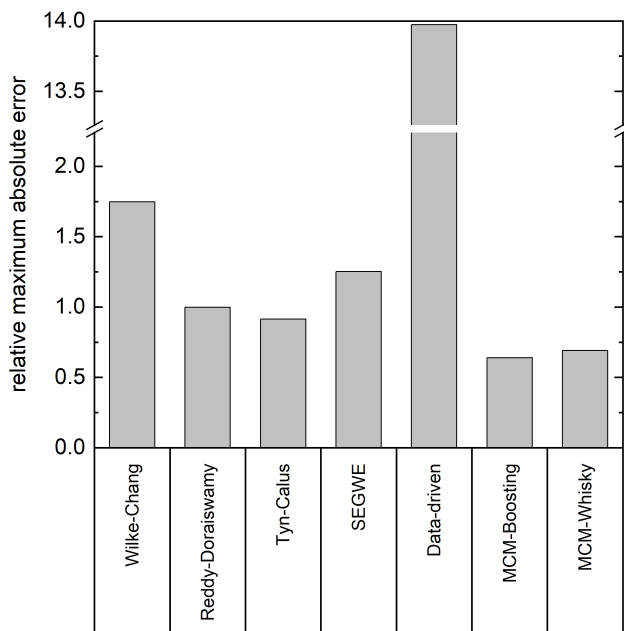

Figure S.3: Relative maximum absolute error of the predicted  $D_{ij}^\infty$  with the studied semiempirical models and the developed MCMs for the experimental data from the reduced database.

## S.4 Complete predictions from MCM-Whisky

Analogous to the MCM-Boosting results in Figure 10 of the main manuscript, we show in Figure S.4 the completed  $D_{ij}^\infty$  matrix from the MCM-Whisky predictions together with the uncertainties of those predictions.

## S.5 Supplementary tabular files

Additional Supplementary Information is provided in a machine readable format in the form of .csv files. The data is provided in two separate folders, named "full" and "reduced", representing the full database and the reduced database that we provide. In each folder, the following files are found:

- *List\_Solutes.csv* and *List\_Solvents.csv*: Here, we give information on all 208 (45) solutes and all 51 (23) solvents, respectively, appearing in the full (reduced) database. Specifically, we report the respective identifiers used in the Dortmund Data Bank (DDB), i.e., the DDB No., which are also used for identifying the components in the other tables, and the CAS Registry Numbers.

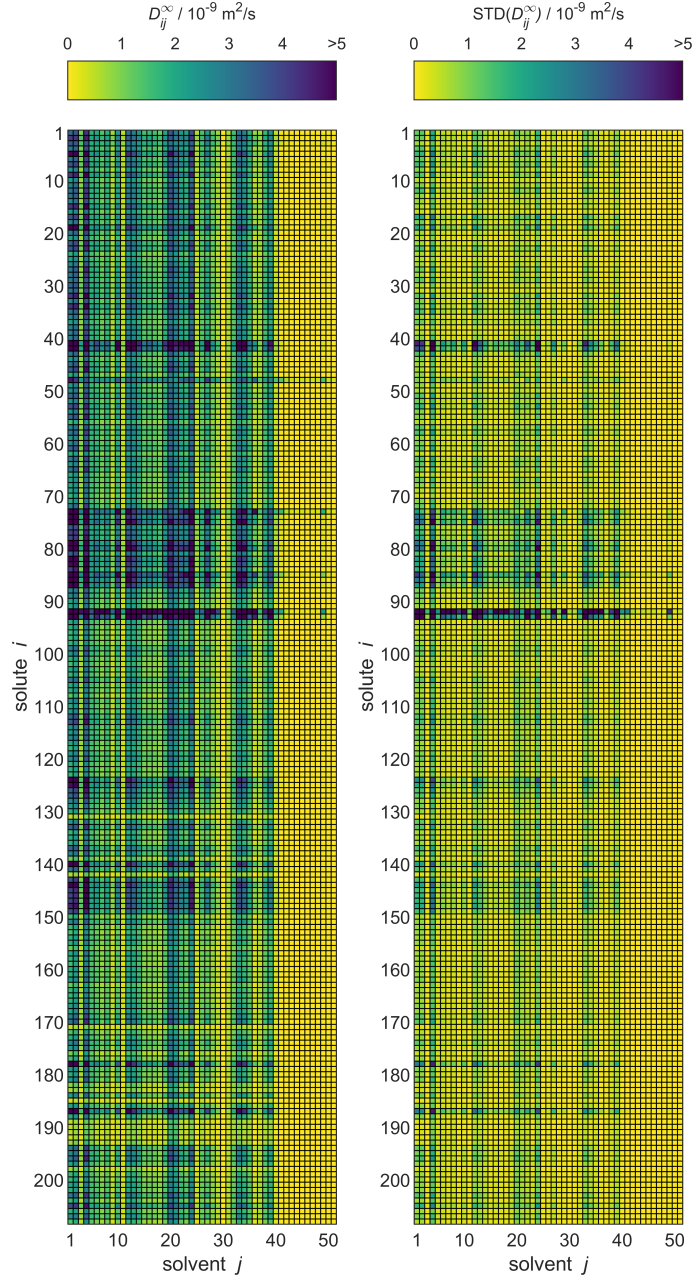

Figure S.4: Predictions of  $D_{ij}^\infty$  by MCM-Whisky (left) and the uncertainties of the predictions (right) for all solutes  $i$  and solvents  $j$  (identified by numbers, see Table S.1) from the full database. The color code indicates the values of  $D_{ij}^\infty$ .

- *DataBase.csv*: Here, we report the numerical values of the full (reduced) database of experimental  $D_{ij}^\infty$  as described in Section 2. The database covers 208 (45) solutes and 51 (23) solvents and includes a total of 353 (166) experimental data points. Data values that were directly adopted from the proprietary DDB without modification are censored in the table.
- *SEGWE*: Here, we report the numerical values of SEGWE for the prediction of  $D_{ij}^\infty$  with a fixed  $\varrho_{\text{eff}} = 619 \text{ kg/m}^3$  on the full (reduced) database. These values of SEGWE were used in the hybridization of the developed MCMs (cf. Manuscript Section 3.2).
- *Boosting\_Predictions.csv*: Here, we report the predictions of  $D_{ij}^\infty$  with the hybrid MCM "MCM-Boosting" developed in this work (cf. Section 3.2.2). The results were obtained here after training the model on all data on  $D_{ij}^\infty$  in the full (reduced) database. The predictions are listed for all 10,608 (1,035) solute-solvent combinations and include a large number of novel data points on  $D_{ij}^\infty$ . In the same table, the the model uncertainty of each predicted  $D_{ij}^\infty$  is listed next to the predicted value in the form of standard deviations.
- *Boosting\_LV\_Solutes.csv* and *Boosting\_LV\_Solvents.csv*: Here, we report the results of the training of MCM-Boosting on the full (reduced) database of  $D_{ij}^\infty$ , which are the feature vectors  $\mathbf{u}_i$  and  $\mathbf{v}_j$  of the solutes and solvents, respectively. The length of the feature vectors is  $K = 2$ .
- *Whisky\_Predictions.csv*: Here, we report the predictions of  $D_{ij}^\infty$  with the hybrid MCM "MCM-Whisky" developed in this work (cf. Section 3.2.2). The results were obtained here after training the model on all data on  $D_{ij}^\infty$  in the full (reduced) database. The predictions are listed for all 10,608 (1,035) solute-solvent combinations and include a large number of novel data points on  $D_{ij}^\infty$ . In the same table, the the model uncertainty of each predicted  $D_{ij}^\infty$  is listed next to the predicted value in the form of standard deviations.
- *Whisky\_LV\_Solutes.csv* and *Whisky\_LV\_Solvents.csv*: Here, we report the results of the training of MCM-Whisky on the full (reduced) database of  $D_{ij}^\infty$ , which are the feature vectors  $\mathbf{u}_i$  and  $\mathbf{v}_j$  of the solutes and solvents, respectively. The length of the feature vectors is  $K = 2$ .

An excerpt of this information is also provided in written form in Tables S.1-S.5.

## S.6 Tabular material

Table S.1: Table of all components, subdivided into solutes and solvents, encountered in the data base on  $D_{ij}^\infty$  developed in this work. All components are listed by their consecutive number, as used in all figures throughout this work, together with their DDB identification number.

| Cons.<br>No.   | DDB<br>No. | Name                        | Cons.<br>No. | DDB<br>No. | Name                                   |
|----------------|------------|-----------------------------|--------------|------------|----------------------------------------|
| <b>Solutes</b> |            |                             |              |            |                                        |
| 1              | 2          | Acetamide                   | 105          | 3063       | L-Ascorbic acid                        |
| 2              | 3          | Acetonitrile                | 106          | 3215       | 4-Hydroxy-3-methoxybenzaldehyde        |
| 3              | 4          | Acetone                     | 107          | 3258       | 2,2-Bis(hydroxymethyl)-1,3-propanediol |
| 4              | 8          | 1,2-Ethanediol              | 108          | 3347       | D-(+)-Saccharose                       |
| 5              | 11         | Ethanol                     | 109          | 3410       | 1,3,5-Triisopropylbenzene              |
| 6              | 12         | Diethyl ether               | 110          | 3468       | DL-Phenylalanine                       |
| 7              | 15         | Formic acid                 | 111          | 3523       | 1,4-Diaminobenzene                     |
| 8              | 17         | Aniline                     | 112          | 3715       | Benzenesulfonic acid                   |
| 9              | 21         | Ethyl acetate               | 113          | 3717       | p-Toluenesulfonic acid                 |
| 10             | 24         | Benzyl alcohol              | 114          | 3724       | L-Alanine                              |
| 11             | 25         | Ethylbenzene                | 115          | 3725       | L-Serine                               |
| 12             | 26         | Bromobenzene                | 116          | 3729       | Glycine                                |
| 13             | 27         | Chlorobenzene               | 117          | 3731       | L-(+)-Aspartic acid                    |
| 14             | 30         | Nitrobenzene                | 118          | 3732       | L-Glutamic acid                        |
| 15             | 31         | Benzene                     | 119          | 3865       | Piperazine                             |
| 16             | 39         | 1-Butanol                   | 120          | 3988       | beta-Alanine                           |
| 17             | 40         | 2-Butanone                  | 121          | 3989       | 4-Aminobutyric acid                    |
| 18             | 41         | n-Butane                    | 122          | 3990       | 5-Aminovaleric acid                    |
| 19             | 46         | Butyl chloride              | 123          | 3991       | 6-Aminohexanoic acid                   |
| 20             | 47         | Chloroform                  | 124          | 4490       | Potassium thiocyanate                  |
| 21             | 49         | 3-Methylphenol              | 125          | 4577       | Potassium chloride                     |
| 22             | 50         | Cyclohexane                 | 126          | 4591       | Cadmium chloride                       |
| 23             | 72         | N,N-Dimethylformamide       | 127          | 4592       | Nickel chloride                        |
| 24             | 77         | 2,6-Dimethylpyridine        | 128          | 4596       | Ferrocene                              |
| 25             | 78         | Dodecane                    | 129          | 4707       | (+)-alpha-Aminobutyric acid            |
| 26             | 79         | Benzaldehyde                | 130          | 4708       | alpha-Aminoisobutanoic acid            |
| 27             | 80         | Butyl acetate               | 131          | 4771       | Buckminsterfullerene                   |
| 28             | 84         | Acetic acid                 | 132          | 4776       | 2-Acetoxy benzoic acid                 |
| 29             | 85         | Furfural                    | 133          | 4792       | Sodium nitrate                         |
| 30             | 89         | Hexane                      | 134          | 4795       | D-Mannose                              |
| 31             | 91         | Heptane                     | 135          | 4801       | !D-Xylose                              |
| 32             | 99         | Methyl iodide               | 136          | 4817       | 1,2,6-Hexanetriol                      |
| 33             | 108        | 1-Methylnaphthalene         | 137          | 4911       | Sodium chloride                        |
| 34             | 110        | Methanol                    | 138          | 4955       | Magnesium chloride                     |
| 35             | 112        | 3-Methylpentane             | 139          | 4960       | Magnesium sulfate                      |
| 36             | 123        | Naphthalene                 | 140          | 4965       | Potassium nitrite                      |
| 37             | 129        | 1-Octene                    | 141          | 5261       | 1,2-Ethanediol-D2 (deuterioglycol)     |
| 38             | 138        | Phenol                      | 142          | 5949       | 3,4-Dihydroxy benzoic acid             |
| 39             | 140        | 1-Propanol                  | 143          | 6317       | Iron(III) sulfate                      |
| 40             | 141        | Propionic acid              | 144          | 6319       | Ammonium chloride                      |
| 41             | 145        | Nitric acid                 | 145          | 6325       | Ammonium sulfate                       |
| 42             | 146        | Hydrogen chloride           | 146          | 6326       | Lead nitrate                           |
| 43             | 147        | Salicylic acid methyl ester | 147          | 6353       | Sodium perchlorate                     |
| 44             | 153        | tert-Butanol                | 148          | 6355       | Potassium chlorate                     |

Continued on next page

Continued from previous page

| Cons.<br>No. | DDB<br>No. | Name                      | Cons.<br>No. | DDB<br>No. | Name                                                             |
|--------------|------------|---------------------------|--------------|------------|------------------------------------------------------------------|
| 45           | 157        | Tetrachloromethane        | 149          | 6372       | Sodium thiocyanate                                               |
| 46           | 161        | Toluene                   | 150          | 6465       | N-Acetyl-p-aminophenol                                           |
| 47           | 168        | Trichloroethylene         | 151          | 6529       | Di-tert-butylsulfide                                             |
| 48           | 174        | Water                     | 152          | 7467       | Titanium tetra-tert.butyloxiide                                  |
| 49           | 230        | Glycerol                  | 153          | 7533       | 15-Crown-5 (15C5)                                                |
| 50           | 235        | Butyric acid              | 154          | 7847       | L-Valine                                                         |
| 51           | 237        | Propane                   | 155          | 7848       | L-Isoleucine                                                     |
| 52           | 250        | Cyclohexanone             | 156          | 7852       | L-Tryptophane                                                    |
| 53           | 269        | Caprylic acid             | 157          | 7949       | L-Cystine                                                        |
| 54           | 284        | N-Methyl-2-pyrrolidone    | 158          | 9329       | 7-Aminoheptanoic acid                                            |
| 55           | 297        | Hexafluorobenzene         | 159          | 10334      | Tris(2,4-pentanedionato)chromium                                 |
| 56           | 308        | 2-Methyl-2,4-pentanediol  | 160          | 10571      | Phenylphosphonic acid                                            |
| 57           | 322        | o-Xylene                  | 161          | 11004      | D-Galactose                                                      |
| 58           | 367        | 2,3-Dimethylbutane        | 162          | 11201      | Sodium caprylate                                                 |
| 59           | 372        | Acetophenone              | 163          | 11202      | Sodium dodecyl sulfate                                           |
| 60           | 425        | Benzoic acid              | 164          | 11722      | L-Threonine                                                      |
| 61           | 430        | Methyl isopropyl ketone   | 165          | 12706      | D-Glucose                                                        |
| 62           | 516        | Hexadecane                | 166          | 13599      | L-Lysine                                                         |
| 63           | 546        | Monoethanolamine          | 167          | 16447      | 1-Ethyl-3-methylimidazolium<br>bis(trifluoromethylsulfonyl)imide |
| 64           | 598        | Trifluoroacetic acid      | 168          | 16583      | 1-Butyl-3-methylimidazolium<br>bis(trifluoromethylsulfonyl)imide |
| 65           | 750        | p-Chlorotoluene           | 169          | 16584      | 1-Ethyl-3-methylimidazolium<br>ethylsulfate                      |
| 66           | 766        | 1,2-Dihydroxybenzene      | 170          | 16731      | Cadmium perchlorate                                              |
| 67           | 809        | 2-Methoxyphenol           | 171          | 17118      | (-)-Epicatechin                                                  |
| 68           | 810        | o-Chlorophenol            | 172          | 17231      | Calcium-L-lactate                                                |
| 69           | 812        | p-Chlorophenol            | 173          | 17273      | D-(-)-Arabinose                                                  |
| 70           | 817        | 1,3-Dihydroxybenzene      | 174          | 17617      | tert-Butan(ol-D)                                                 |
| 71           | 894        | 2,2"-Diethanolamine (DEA) | 175          | 18690      | Monosodium glutamate                                             |
| 72           | 925        | Anthracene                | 176          | 18840      | Lysozyme                                                         |
| 73           | 1050       | Carbon dioxide            | 177          | 18842      | L-3,4-Dihydroxyphenylalanine                                     |
| 74           | 1051       | Methane                   | 178          | 18845      | 1-Butyl-3-methylimidazolium<br>methylsulfate                     |
| 75           | 1052       | Oxygen                    | 179          | 18857      | Monosodium L-aspartate                                           |
| 76           | 1053       | Ethylene                  | 180          | 19687      | L-Arginine                                                       |
| 77           | 1054       | Ethane                    | 181          | 20036      | 1-Butyl-3-methylimidazolium octyl<br>sulfate                     |
| 78           | 1055       | Propylene                 | 182          | 20046      | alpha-Cyclodextrin                                               |
| 79           | 1056       | Nitrogen                  | 183          | 20047      | beta-Cyclodextrin                                                |
| 80           | 1058       | Argon                     | 184          | 22696      | 5-Hydroxymethylfurfural                                          |
| 81           | 1059       | Chlorine                  | 185          | 23228      | Isoquercitrin                                                    |
| 82           | 1060       | Krypton                   | 186          | 23325      | (.+.)-.beta.-Aminobutyric acid                                   |
| 83           | 1061       | Dinitrogen monoxide       | 187          | 26695      | [EMIM] methylsulfate                                             |
| 84           | 1062       | Xenon                     | 188          | 26828      | Platinum (II) acetylacetonate                                    |
| 85           | 1063       | Hydrogen                  | 189          | 33333      | Gallic acid monohydrate                                          |
| 86           | 1064       | Ethyne                    | 190          | 33334      | (+)-Catechin hydrate                                             |
| 87           | 1065       | Hydrogen sulfide          | 191          | 33340      | Peonidin-3-glucoside chloride                                    |
| 88           | 1086       | 2,2,2-Trifluoroethanol    | 192          | 33341      | Malvidin-3,5-diglucoside chloride                                |
| 89           | 1090       | 2,2-Dimethylpentane       | 193          | 34501      | 2-Hydroxypropyl-beta-cyclodextrin                                |
| 90           | 1143       | 1,3-Butanediol            | 194          | 34550      | 1,8-Bis(trimethylammonium)octane<br>dibromide                    |

Continued on next page

Continued from previous page

| Cons. No. | DDB No. | Name                    | Cons. No. | DDB No. | Name                                                           |
|-----------|---------|-------------------------|-----------|---------|----------------------------------------------------------------|
| 91        | 1264    | alpha-Aminotoluene      | 195       | 34551   | 1,10-Bis(trimethylammonium)decane dibromide                    |
| 92        | 1292    | Helium                  | 196       | 34552   | 1,12-Bis(trimethylammonium)dodecane dibromide                  |
| 93        | 1293    | Neon                    | 197       | 36721   | o-Sulfanilic acid                                              |
| 94        | 1594    | Pyrene                  | 198       | 37864   | 2-Hydroxypropyl-alpha-cyclodextrin                             |
| 95        | 1642    | 1,4-Dihydroxybenzene    | 199       | 40775   | DL-m-Tyrosine                                                  |
| 96        | 1645    | 1,2,3-Trihydroxybenzene | 200       | 40777   | DL-o-Tyrosine                                                  |
| 97        | 2186    | Diisopropanolamine      | 201       | 40779   | D,L-beta-Aminoisobutyric acid                                  |
| 98        | 2187    | Methyldiethanolamine    | 202       | 43996   | m-Sulfanilic acid                                              |
| 99        | 2245    | Phosphoric acid         | 203       | 46014   | p-Phenolsulfonic acid                                          |
| 100       | 2501    | 1,2-Benzenediamine      | 204       | 49211   | beta-Cyclodextrin, sulfated sodium salt                        |
| 101       | 2506    | 3-Methoxyphenol         | 205       | 51976   | Lithium acetylacetonate                                        |
| 102       | 2542    | Perylene                | 206       | 54011   | N-Methylphenothiazine                                          |
| 103       | 2945    | 3-Hydroxyaniline        | 207       | 54491   | L-Histidine methyl ester dihydrochloride                       |
| 104       | 2994    | DL-Tyrosine             | 208       | 61801   | Tetrasodium tetraphenylporphyrinetetrasulfonate                |
| Solvents  |         |                         |           |         |                                                                |
| 1         | 3       | Acetonitrile            | 27        | 161     | Toluene                                                        |
| 2         | 4       | Acetone                 | 28        | 174     | Water                                                          |
| 3         | 11      | Ethanol                 | 29        | 250     | Cyclohexanone                                                  |
| 4         | 12      | Diethyl ether           | 30        | 282     | 1,2-Propanediol                                                |
| 5         | 21      | Ethyl acetate           | 31        | 284     | N-Methyl-2-pyrrolidone                                         |
| 6         | 25      | Ethylbenzene            | 32        | 297     | Hexafluorobenzene                                              |
| 7         | 26      | Bromobenzene            | 33        | 367     | 2,3-Dimethylbutane                                             |
| 8         | 27      | Chlorobenzene           | 34        | 430     | Methyl isopropyl ketone                                        |
| 9         | 30      | Nitrobenzene            | 35        | 451     | Carbonic acid dimethyl ester                                   |
| 10        | 31      | Benzene                 | 36        | 516     | Hexadecane                                                     |
| 11        | 39      | 1-Butanol               | 37        | 887     | Deuterium oxide                                                |
| 12        | 40      | 2-Butanone              | 38        | 982     | Perdeuteromethanol                                             |
| 13        | 46      | Butyl chloride          | 39        | 1090    | 2,2-Dimethylpentane                                            |
| 14        | 47      | Chloroform              | 40        | 3410    | 1,3,5-Triisopropylbenzene                                      |
| 15        | 50      | Cyclohexane             | 41        | 4331    | Hexamethyltetracosane                                          |
| 16        | 60      | Decane                  | 42        | 16447   | 1-Ethyl-3-methylimidazolium bis(trifluoromethylsulfonyl)imide  |
| 17        | 72      | N,N-Dimethylformamide   | 43        | 16583   | 1-Butyl-3-methylimidazolium bis(trifluoromethylsulfonyl)imide  |
| 18        | 78      | Dodecane                | 44        | 16810   | 1-Octyl-3-methylimidazolium tetrafluoroborate                  |
| 19        | 80      | Butyl acetate           | 45        | 18162   | 1-Hexyl-3-methylimidazolium bis(trifluoromethylsulfonyl)imide  |
| 20        | 89      | Hexane                  | 46        | 18174   | 1-Hexyl-3-methylimidazolium tetrafluoroborate                  |
| 21        | 91      | Heptane                 | 47        | 18642   | 1-Ethyl-3-methylimidazolium bis(pentafluoroethylsulfonyl)imide |
| 22        | 97      | 2,2,4-Trimethylpentane  | 48        | 18988   | 1-Ethyl-3-methylimidazolium trifluoromethylsulfonate           |
| 23        | 110     | Methanol                | 49        | 20138   | 1-Butyl-3-methylimidazolium dicyanamide                        |
| 24        | 112     | 3-Methylpentane         | 50        | 22417   | 1-Ethyl-3-methylimidazolium trifluoroacetate                   |
| 25        | 140     | 1-Propanol              | 51        | 22674   | 1-Butyl-3-methylpyridinium tetrafluoroborate                   |
| 26        | 157     | Tetrachloromethane      |           |         |                                                                |

Table S.2: Latent variables  $u_i$  of the solutes for both hybrid MCMs, for the data set of the reduced data base.

| $i$ | Name                     | MCM-Boosting |          | MCM-Whisky |          |
|-----|--------------------------|--------------|----------|------------|----------|
|     |                          | $u_{i1}$     | $u_{i2}$ | $u_{i1}$   | $u_{i2}$ |
| 1   | Acetonitrile             | 0.0259       | -0.3137  | 1.1140     | 1.0072   |
| 2   | Acetone                  | -0.0383      | -0.6594  | 0.8325     | 1.0875   |
| 3   | Ethanol                  | -0.1208      | -0.2232  | 1.2558     | 0.6697   |
| 4   | Ethyl acetate            | 0.0183       | -1.0212  | 1.2218     | 0.3069   |
| 5   | Benzyl alcohol           | -0.0248      | 0.0109   | 0.9067     | -0.2790  |
| 6   | Ethylbenzene             | 0.0853       | -0.3729  | 1.0475     | -0.0265  |
| 7   | Chlorobenzene            | 0.0830       | -0.6592  | 1.0640     | -0.0972  |
| 8   | Benzene                  | 0.0225       | -0.7974  | 1.0589     | 0.6732   |
| 9   | 1-Butanol                | 0.0652       | 0.5200   | 0.8152     | -0.3123  |
| 10  | Butyl chloride           | -0.1005      | -1.3470  | 0.9289     | 1.0876   |
| 11  | 3-Methylphenol           | 0.0168       | 0.0857   | 0.9696     | -0.3696  |
| 12  | Cyclohexane              | -0.0247      | -0.1559  | 0.9850     | 0.0256   |
| 13  | Dodecane                 | -0.1310      | 0.4674   | 0.7540     | -0.2834  |
| 14  | Benzaldehyde             | -0.0026      | -0.3415  | 0.9643     | 0.0233   |
| 15  | Butyl acetate            | 0.0583       | -0.5567  | 1.0636     | -0.1444  |
| 16  | Acetic acid              | 0.1207       | 0.3451   | 1.0522     | 0.0817   |
| 17  | Hexane                   | -0.0562      | 0.4757   | 1.0284     | 0.1294   |
| 18  | Heptane                  | -0.1007      | -0.3165  | 1.0001     | -0.0528  |
| 19  | Methyl iodide            | 0.0453       | -1.8181  | 1.1878     | 0.5537   |
| 20  | Methanol                 | -0.0717      | 0.6005   | 1.2734     | 0.8127   |
| 21  | Naphthalene              | 0.1071       | -0.6001  | 1.0165     | -0.0713  |
| 22  | Phenol                   | 0.1714       | -0.1511  | 1.1026     | -0.1210  |
| 23  | 1-Propanol               | 0.0338       | 0.4886   | 1.0087     | -0.1563  |
| 24  | Propionic acid           | 0.0481       | 0.1907   | 1.0585     | 0.0166   |
| 25  | Tetrachloromethane       | 0.0657       | -0.7153  | 0.9538     | -0.2629  |
| 26  | Toluene                  | 0.0294       | -0.4151  | 1.0385     | 0.1623   |
| 27  | Water                    | 0.0160       | 1.0622   | 1.2625     | 1.2361   |
| 28  | Glycerol                 | -0.0547      | 0.2778   | 0.9945     | -0.4034  |
| 29  | Butyric acid             | 0.0493       | 0.1375   | 0.9714     | -0.0868  |
| 30  | Hexafluorobenzene        | 0.0554       | -1.2698  | 1.0224     | -0.0083  |
| 31  | 2-Methyl-2,4-pentanediol | 0.1493       | -0.1078  | 0.7891     | -0.4680  |
| 32  | Acetophenone             | 0.0366       | -0.2193  | 0.8595     | -0.0045  |
| 33  | Methyl isopropyl ketone  | -0.0220      | -0.3874  | 1.0480     | 0.2781   |
| 34  | Hexadecane               | -0.0178      | 0.6118   | 0.6210     | -0.4563  |
| 35  | p-Chlorotoluene          | 0.1212       | -0.5070  | 1.0570     | -0.1735  |
| 36  | 1,2-Dihydroxybenzene     | 0.0735       | 0.3086   | 0.8749     | -0.5178  |
| 37  | p-Chlorophenol           | 0.0550       | -0.0153  | 0.9082     | -0.4891  |
| 38  | 1,3-Dihydroxybenzene     | 0.1110       | 0.5870   | 1.0430     | -0.8759  |
| 39  | Carbon dioxide           | 0.0024       | -2.1624  | 1.0677     | 2.6978   |
| 40  | Pyrene                   | 0.0411       | -0.3815  | 0.7835     | -0.4026  |
| 41  | 1,4-Dihydroxybenzene     | -0.0929      | 0.7952   | 1.0314     | -0.9901  |
| 42  | 1,2,3-Trihydroxybenzene  | 0.0466       | 0.5331   | 0.8596     | -0.8712  |
| 43  | Perylene                 | -0.0153      | -0.2712  | 0.6542     | -0.6323  |
| 44  | 3-Hydroxyaniline         | 0.0221       | 0.5058   | 0.9982     | -0.6519  |
| 45  | Di-tert-butylsulfide     | -0.0455      | -0.5260  | 0.8416     | 0.0409   |

Table S.3: Latent variables  $v_j$  of the solvents for both hybrid MCMs, for the data set of the reduced data base.

| $j$ | Name                    | MCM-Boosting |          | MCM-Whisky |          |
|-----|-------------------------|--------------|----------|------------|----------|
|     |                         | $v_{j1}$     | $v_{j2}$ | $v_{j1}$   | $v_{j2}$ |
| 1   | Acetonitrile            | 0.0808       | 0.1552   | 1.0329     | 0.3479   |
| 2   | Acetone                 | -0.0143      | 0.3749   | 1.2012     | 0.0947   |
| 3   | Ethanol                 | 0.0235       | 0.4952   | -0.0895    | 0.4689   |
| 4   | Ethyl acetate           | 0.0245       | -0.4662  | 0.5537     | 0.1355   |
| 5   | Benzene                 | 0.0041       | 0.3100   | 0.7094     | 0.2268   |
| 6   | 1-Butanol               | -0.0171      | 0.6077   | -0.7692    | 0.4649   |
| 7   | Butyl chloride          | -0.0616      | 0.0769   | 1.0076     | 0.0935   |
| 8   | Chloroform              | -0.1435      | 0.0860   | 0.7535     | 0.2162   |
| 9   | Cyclohexane             | -0.0421      | 0.4390   | 0.3997     | 0.2822   |
| 10  | Dodecane                | 0.1043       | -0.6007  | 0.1037     | 0.2835   |
| 11  | Butyl acetate           | -0.0016      | 0.3710   | 0.5711     | 0.2338   |
| 12  | Hexane                  | -0.0297      | 0.0871   | 1.2860     | 0.0933   |
| 13  | Heptane                 | -0.0449      | 0.1479   | 1.1070     | 0.1109   |
| 14  | Methanol                | -0.0325      | 0.3837   | 0.5793     | 0.4010   |
| 15  | 1-Propanol              | 0.0604       | 0.5545   | -0.6209    | 0.5466   |
| 16  | Tetrachloromethane      | 0.0471       | -0.0292  | 0.2200     | 0.2178   |
| 17  | Toluene                 | -0.0317      | 0.0448   | 0.7320     | 0.1470   |
| 18  | Water                   | 0.0019       | 0.1685   | 0.0015     | 0.2546   |
| 19  | 1,2-Propanediol         | -0.0228      | 0.4908   | -3.1392    | 0.5874   |
| 20  | N-Methyl-2-pyrrolidone  | -0.0056      | 0.2545   | -0.4168    | 0.3778   |
| 21  | Hexafluorobenzene       | -0.0188      | -0.0455  | 0.3585     | 0.1540   |
| 22  | Methyl isopropyl ketone | -0.0201      | 0.3742   | 0.7499     | 0.1693   |
| 23  | Hexadecane              | -0.0470      | -1.1143  | -0.3064    | 1.1473   |

Table S.4: Table of the full data base on  $D_{ij}^\infty$  developed in this work. The numerical values were determined as described in Section 2. In cases where a value was adopted directly from the Dortmund Data Base<sup>13</sup> and can thus be found therein, it is simply listed as "DDB".

| Solute  | Solvent | $D_{ij}^\infty \times 10^9$ | Solute  | Solvent | $D_{ij}^\infty \times 10^9$ |
|---------|---------|-----------------------------|---------|---------|-----------------------------|
| DDB No. | DDB No. | m <sup>2</sup> /s           | DDB No. | DDB No. | m <sup>2</sup> /s           |
| 2       | 174     | 1.25                        | 39      | 110     | 1.30                        |
| 3       | 161     | 2.88                        | 39      | 140     | 0.53                        |
| 3       | 174     | DDB                         | 39      | 174     | DDB                         |
| 4       | 31      | 2.76                        | 40      | 157     | 1.67                        |
| 4       | 39      | DDB                         | 41      | 174     | DDB                         |
| 4       | 47      | 2.33                        | 46      | 91      | 3.43                        |
| 4       | 50      | 2.22                        | 46      | 140     | DDB                         |
| 4       | 110     | DDB                         | 47      | 4       | 3.63                        |
| 4       | 140     | DDB                         | 47      | 12      | DDB                         |
| 4       | 157     | 1.71                        | 49      | 11      | DDB                         |
| 4       | 174     | DDB                         | 49      | 110     | DDB                         |
| 8       | 174     | DDB                         | 49      | 140     | DDB                         |
| 11      | 31      | DDB                         | 49      | 174     | DDB                         |
| 11      | 174     | 1.23                        | 50      | 4       | 3.84                        |
| 12      | 47      | DDB                         | 50      | 31      | DDB                         |
| 15      | 174     | 1.51                        | 50      | 91      | DDB                         |

Continued on next page

Continued from previous page

| <b>Solute</b> | <b>Solvent</b> | $D_{ij}^{\infty} \times 10^9$ | <b>Solute</b> | <b>Solvent</b> | $D_{ij}^{\infty} \times 10^9$ |
|---------------|----------------|-------------------------------|---------------|----------------|-------------------------------|
| DDB No.       | DDB No.        | m <sup>2</sup> /s             | DDB No.       | DDB No.        | m <sup>2</sup> /s             |
| 17            | 174            | DDB                           | 50            | 157            | 1.28                          |
| 21            | 31             | 3.17                          | 50            | 161            | DDB                           |
| 21            | 157            | 1.46                          | 50            | 297            | 1.59                          |
| 24            | 11             | DDB                           | 72            | 31             | DDB                           |
| 24            | 110            | DDB                           | 77            | 174            | 0.71                          |
| 24            | 140            | DDB                           | 78            | 89             | DDB                           |
| 24            | 174            | DDB                           | 78            | 516            | DDB                           |
| 25            | 89             | DDB                           | 79            | 11             | DDB                           |
| 25            | 91             | 3.08                          | 79            | 110            | DDB                           |
| 26            | 27             | 1.62                          | 79            | 174            | DDB                           |
| 27            | 26             | 1.32                          | 80            | 174            | DDB                           |
| 27            | 89             | DDB                           | 80            | 430            | 2.56                          |
| 27            | 91             | DDB                           | 84            | 11             | 0.96                          |
| 30            | 89             | 3.93                          | 84            | 110            | 1.83                          |
| 30            | 97             | 1.78                          | 84            | 140            | DDB                           |
| 31            | 4              | DDB                           | 84            | 157            | 1.34                          |
| 31            | 11             | DDB                           | 84            | 174            | 1.21                          |
| 31            | 21             | 1.88                          | 85            | 174            | DDB                           |
| 31            | 47             | DDB                           | 89            | 30             | 0.86                          |
| 31            | 50             | DDB                           | 89            | 31             | 2.09                          |
| 31            | 60             | DDB                           | 89            | 78             | 1.40                          |
| 31            | 72             | DDB                           | 89            | 91             | 3.18                          |
| 31            | 89             | DDB                           | 89            | 161            | 2.27                          |
| 31            | 91             | 3.83                          | 89            | 516            | 0.85                          |
| 31            | 110            | DDB                           | 91            | 25             | DDB                           |
| 31            | 157            | DDB                           | 91            | 31             | DDB                           |
| 31            | 161            | DDB                           | 91            | 46             | 2.65                          |
| 31            | 174            | DDB                           | 91            | 50             | DDB                           |
| 31            | 282            | DDB                           | 91            | 89             | 3.72                          |
| 31            | 297            | 1.54                          | 91            | 112            | 3.75                          |
| 39            | 4              | DDB                           | 91            | 161            | DDB                           |
| 91            | 250            | DDB                           | 174           | 284            | DDB                           |
| 91            | 367            | 3.34                          | 174           | 430            | 3.26                          |
| 91            | 1090           | 2.74                          | 174           | 516            | DDB                           |
| 99            | 110            | DDB                           | 174           | 4331           | DDB                           |
| 99            | 174            | DDB                           | 174           | 16583          | 0.39                          |
| 108           | 110            | DDB                           | 174           | 20138          | 2.08                          |
| 110           | 39             | 0.48                          | 230           | 174            | 0.95                          |
| 110           | 140            | 0.69                          | 230           | 284            | DDB                           |
| 110           | 174            | DDB                           | 235           | 11             | DDB                           |
| 112           | 91             | 3.06                          | 235           | 110            | DDB                           |
| 123           | 89             | DDB                           | 235           | 140            | DDB                           |
| 123           | 91             | DDB                           | 235           | 174            | 0.96                          |
| 123           | 110            | DDB                           | 237           | 174            | DDB                           |
| 123           | 174            | DDB                           | 250           | 91             | DDB                           |
| 129           | 18162          | DDB                           | 269           | 174            | 1.56                          |
| 138           | 11             | DDB                           | 284           | 174            | DDB                           |
| 138           | 110            | DDB                           | 297           | 31             | 2.27                          |
| 138           | 140            | DDB                           | 297           | 50             | 1.63                          |

Continued on next page

Continued from previous page

| <b>Solute</b> | <b>Solvent</b> | $D_{ij}^{\infty} \times 10^9$ | <b>Solute</b> | <b>Solvent</b> | $D_{ij}^{\infty} \times 10^9$ |
|---------------|----------------|-------------------------------|---------------|----------------|-------------------------------|
| DDB No.       | DDB No.        | m <sup>2</sup> /s             | DDB No.       | DDB No.        | m <sup>2</sup> /s             |
| 138           | 174            | DDB                           | 297           | 3410           | 0.41                          |
| 138           | 282            | DDB                           | 308           | 174            | DDB                           |
| 140           | 4              | DDB                           | 308           | 284            | DDB                           |
| 140           | 39             | 0.41                          | 322           | 91             | DDB                           |
| 140           | 46             | DDB                           | 367           | 91             | 2.94                          |
| 140           | 110            | 1.36                          | 372           | 11             | DDB                           |
| 140           | 174            | 1.07                          | 372           | 110            | DDB                           |
| 141           | 11             | DDB                           | 425           | 174            | 1.12                          |
| 141           | 110            | DDB                           | 430           | 80             | 2.15                          |
| 141           | 140            | DDB                           | 430           | 174            | 1.17                          |
| 141           | 174            | 1.06                          | 516           | 78             | 0.94                          |
| 145           | 174            | DDB                           | 516           | 89             | 2.20                          |
| 146           | 174            | 3.00                          | 546           | 174            | 1.09                          |
| 147           | 982            | 1.92                          | 598           | 157            | 1.33                          |
| 153           | 174            | 0.92                          | 750           | 89             | DDB                           |
| 157           | 4              | 3.59                          | 750           | 91             | DDB                           |
| 157           | 21             | 1.47                          | 766           | 11             | DDB                           |
| 157           | 40             | 3.19                          | 766           | 110            | DDB                           |
| 157           | 50             | DDB                           | 766           | 140            | DDB                           |
| 161           | 3              | 3.33                          | 766           | 174            | DDB                           |
| 161           | 31             | DDB                           | 809           | 174            | DDB                           |
| 161           | 50             | DDB                           | 810           | 174            | DDB                           |
| 161           | 89             | 3.95                          | 812           | 11             | DDB                           |
| 161           | 91             | 3.35                          | 812           | 110            | DDB                           |
| 161           | 110            | DDB                           | 812           | 140            | DDB                           |
| 168           | 174            | DDB                           | 812           | 174            | DDB                           |
| 174           | 3              | DDB                           | 817           | 11             | DDB                           |
| 174           | 4              | DDB                           | 817           | 110            | DDB                           |
| 174           | 11             | 1.20                          | 817           | 140            | DDB                           |
| 174           | 80             | 2.83                          | 817           | 174            | DDB                           |
| 174           | 140            | 0.74                          | 817           | 282            | DDB                           |
| 894           | 174            | 0.82                          | 2542          | 89             | DDB                           |
| 925           | 110            | DDB                           | 2542          | 91             | DDB                           |
| 1050          | 11             | DDB                           | 2945          | 11             | DDB                           |
| 1050          | 110            | 6.20                          | 2945          | 110            | DDB                           |
| 1050          | 140            | DDB                           | 2945          | 140            | DDB                           |
| 1050          | 174            | DDB                           | 2945          | 174            | DDB                           |
| 1050          | 16447          | DDB                           | 2994          | 174            | DDB                           |
| 1050          | 16810          | DDB                           | 3063          | 174            | 1.13                          |
| 1050          | 18162          | 0.37                          | 3215          | 174            | DDB                           |
| 1050          | 18174          | DDB                           | 3258          | 174            | 0.77                          |
| 1050          | 18642          | DDB                           | 3347          | 174            | DDB                           |
| 1050          | 18988          | DDB                           | 3410          | 297            | 1.23                          |
| 1050          | 22417          | DDB                           | 3468          | 174            | DDB                           |
| 1050          | 22674          | DDB                           | 3523          | 174            | DDB                           |
| 1051          | 174            | 1.92                          | 3715          | 174            | DDB                           |
| 1052          | 174            | DDB                           | 3717          | 174            | DDB                           |
| 1053          | 174            | DDB                           | 3724          | 174            | 0.93                          |
| 1054          | 174            | DDB                           | 3725          | 174            | 0.92                          |

Continued on next page

Continued from previous page

| <b>Solute</b> | <b>Solvent</b> | $D_{ij}^{\infty} \times 10^9$ | <b>Solute</b> | <b>Solvent</b> | $D_{ij}^{\infty} \times 10^9$ |
|---------------|----------------|-------------------------------|---------------|----------------|-------------------------------|
| DDB No.       | DDB No.        | m <sup>2</sup> /s             | DDB No.       | DDB No.        | m <sup>2</sup> /s             |
| 1055          | 174            | DDB                           | 3729          | 174            | 1.06                          |
| 1056          | 174            | 1.99                          | 3731          | 174            | 0.83                          |
| 1058          | 174            | DDB                           | 3732          | 174            | 0.74                          |
| 1059          | 174            | DDB                           | 3865          | 174            | 0.89                          |
| 1060          | 174            | DDB                           | 3988          | 174            | DDB                           |
| 1061          | 174            | 1.76                          | 3989          | 174            | 0.78                          |
| 1062          | 174            | DDB                           | 3990          | 174            | DDB                           |
| 1063          | 174            | 2.91                          | 3991          | 174            | DDB                           |
| 1064          | 174            | DDB                           | 4490          | 174            | DDB                           |
| 1065          | 174            | 2.07                          | 4577          | 174            | 1.95                          |
| 1086          | 174            | 1.08                          | 4591          | 174            | DDB                           |
| 1090          | 91             | 3.09                          | 4592          | 174            | 1.26                          |
| 1143          | 174            | DDB                           | 4596          | 3              | DDB                           |
| 1264          | 174            | DDB                           | 4707          | 174            | DDB                           |
| 1292          | 174            | 6.76                          | 4708          | 174            | DDB                           |
| 1293          | 174            | DDB                           | 4771          | 161            | DDB                           |
| 1594          | 89             | DDB                           | 4776          | 982            | 1.59                          |
| 1594          | 91             | DDB                           | 4792          | 174            | 1.44                          |
| 1594          | 110            | DDB                           | 4795          | 174            | DDB                           |
| 1642          | 11             | DDB                           | 4801          | 174            | DDB                           |
| 1642          | 140            | DDB                           | 4817          | 174            | DDB                           |
| 1642          | 174            | DDB                           | 4911          | 174            | 1.32                          |
| 1645          | 11             | DDB                           | 4955          | 174            | 1.16                          |
| 1645          | 110            | DDB                           | 4960          | 174            | DDB                           |
| 1645          | 140            | DDB                           | 4965          | 174            | DDB                           |
| 1645          | 174            | DDB                           | 5261          | 887            | 0.82                          |
| 2186          | 174            | DDB                           | 5949          | 174            | DDB                           |
| 2187          | 174            | DDB                           | 6317          | 174            | 1.57                          |
| 2245          | 174            | 1.09                          | 6319          | 174            | DDB                           |
| 2501          | 174            | DDB                           | 6325          | 174            | DDB                           |
| 2506          | 174            | DDB                           | 6326          | 174            | DDB                           |
| 6353          | 174            | 1.48                          | 18845         | 174            | DDB                           |
| 6355          | 174            | DDB                           | 18857         | 174            | 0.94                          |
| 6372          | 174            | 1.48                          | 19687         | 174            | 0.74                          |
| 6465          | 174            | 0.67                          | 20036         | 174            | DDB                           |
| 6529          | 110            | DDB                           | 20046         | 174            | 0.35                          |
| 6529          | 174            | DDB                           | 20047         | 174            | 0.33                          |
| 7467          | 157            | 0.97                          | 22696         | 174            | DDB                           |
| 7533          | 887            | 0.40                          | 23228         | 174            | DDB                           |
| 7847          | 174            | 0.74                          | 23325         | 174            | DDB                           |
| 7848          | 174            | 0.77                          | 26695         | 174            | DDB                           |
| 7852          | 110            | DDB                           | 26828         | 11             | DDB                           |
| 7949          | 174            | DDB                           | 33333         | 174            | DDB                           |
| 9329          | 174            | DDB                           | 33334         | 174            | DDB                           |
| 10334         | 11             | DDB                           | 33340         | 174            | DDB                           |
| 10571         | 174            | DDB                           | 33341         | 174            | DDB                           |
| 11004         | 174            | DDB                           | 34501         | 174            | 0.32                          |
| 11201         | 174            | 0.86                          | 34550         | 174            | DDB                           |
| 11202         | 174            | 0.49                          | 34551         | 174            | DDB                           |

Continued on next page

Continued from previous page

| <b>Solute</b> | <b>Solvent</b> | $D_{ij}^{\infty} \times 10^9$ | <b>Solute</b> | <b>Solvent</b> | $D_{ij}^{\infty} \times 10^9$ |
|---------------|----------------|-------------------------------|---------------|----------------|-------------------------------|
| DDB No.       | DDB No.        | m <sup>2</sup> /s             | DDB No.       | DDB No.        | m <sup>2</sup> /s             |
| 11722         | 174            | 0.77                          | 34552         | 174            | DDB                           |
| 12706         | 174            | DDB                           | 36721         | 174            | DDB                           |
| 13599         | 174            | 0.67                          | 37864         | 174            | 0.35                          |
| 16447         | 174            | DDB                           | 40775         | 174            | DDB                           |
| 16583         | 174            | DDB                           | 40777         | 174            | DDB                           |
| 16584         | 174            | DDB                           | 40779         | 174            | DDB                           |
| 16731         | 174            | DDB                           | 43996         | 174            | DDB                           |
| 17118         | 174            | DDB                           | 46014         | 174            | DDB                           |
| 17231         | 174            | 0.63                          | 49211         | 174            | 0.70                          |
| 17273         | 174            | DDB                           | 51976         | 11             | 1.24                          |
| 17617         | 887            | 0.65                          | 54011         | 451            | 1.26                          |
| 18690         | 174            | 0.89                          | 54491         | 174            | 1.05                          |
| 18840         | 174            | DDB                           | 61801         | 174            | 0.62                          |
| 18842         | 174            | 0.61                          |               |                |                               |

Table S.5: Table of the reduced data base on  $D_{ij}^{\infty}$  developed in this work. The numerical values were determined as described in Section 3.2.4. In cases where a value was adopted directly from the Dortmund Data Base<sup>13</sup> and can thus be found therein, it is simply listed as "DDB".

| <b>Solute</b> | <b>Solvent</b> | $D_{ij}^{\infty} \times 10^9$ | <b>Solute</b> | <b>Solvent</b> | $D_{ij}^{\infty} \times 10^9$ |
|---------------|----------------|-------------------------------|---------------|----------------|-------------------------------|
| DDB No.       | DDB No.        | m <sup>2</sup> /s             | DDB No.       | DDB No.        | m <sup>2</sup> /s             |
| 3             | 161            | 2.88                          | 50            | 91             | DDB                           |
| 3             | 174            | DDB                           | 50            | 157            | 1.28                          |
| 4             | 31             | 2.76                          | 50            | 161            | DDB                           |
| 4             | 39             | DDB                           | 50            | 297            | 1.59                          |
| 4             | 47             | 2.33                          | 78            | 89             | DDB                           |
| 4             | 50             | 2.22                          | 78            | 516            | DDB                           |
| 4             | 110            | DDB                           | 79            | 11             | DDB                           |
| 4             | 140            | DDB                           | 79            | 110            | DDB                           |
| 4             | 157            | 1.71                          | 79            | 174            | DDB                           |
| 4             | 174            | DDB                           | 80            | 174            | DDB                           |
| 11            | 31             | DDB                           | 80            | 430            | 2.56                          |
| 11            | 174            | 1.23                          | 84            | 11             | 0.96                          |
| 21            | 31             | 3.17                          | 84            | 110            | 1.83                          |
| 21            | 157            | 1.46                          | 84            | 140            | DDB                           |
| 24            | 11             | DDB                           | 84            | 157            | 1.34                          |
| 24            | 110            | DDB                           | 84            | 174            | 1.21                          |
| 24            | 140            | DDB                           | 89            | 31             | 2.09                          |
| 24            | 174            | DDB                           | 89            | 78             | 1.40                          |
| 25            | 89             | DDB                           | 89            | 91             | 3.18                          |
| 25            | 91             | 3.08                          | 89            | 161            | 2.27                          |
| 27            | 89             | DDB                           | 89            | 516            | 0.85                          |
| 27            | 91             | DDB                           | 91            | 31             | DDB                           |
| 31            | 4              | DDB                           | 91            | 46             | 2.65                          |
| 31            | 11             | DDB                           | 91            | 50             | DDB                           |
| 31            | 21             | 1.88                          | 91            | 89             | 3.72                          |

Continued on next page

Continued from previous page

| <b>Solute</b> | <b>Solvent</b> | $D_{ij}^{\infty} \times 10^9$ | <b>Solute</b> | <b>Solvent</b> | $D_{ij}^{\infty} \times 10^9$ |
|---------------|----------------|-------------------------------|---------------|----------------|-------------------------------|
| DDB No.       | DDB No.        | m <sup>2</sup> /s             | DDB No.       | DDB No.        | m <sup>2</sup> /s             |
| 31            | 47             | DDB                           | 91            | 161            | DDB                           |
| 31            | 50             | DDB                           | 99            | 110            | DDB                           |
| 31            | 89             | DDB                           | 99            | 174            | DDB                           |
| 31            | 91             | 3.83                          | 110           | 39             | 0.48                          |
| 31            | 110            | DDB                           | 110           | 140            | 0.69                          |
| 31            | 157            | DDB                           | 110           | 174            | DDB                           |
| 31            | 161            | DDB                           | 123           | 89             | DDB                           |
| 31            | 174            | DDB                           | 123           | 91             | DDB                           |
| 31            | 282            | DDB                           | 123           | 110            | DDB                           |
| 31            | 297            | 1.54                          | 123           | 174            | DDB                           |
| 39            | 4              | DDB                           | 138           | 11             | DDB                           |
| 39            | 110            | 1.30                          | 138           | 110            | DDB                           |
| 39            | 140            | 0.53                          | 138           | 140            | DDB                           |
| 39            | 174            | DDB                           | 138           | 174            | DDB                           |
| 46            | 91             | 3.43                          | 138           | 282            | DDB                           |
| 46            | 140            | DDB                           | 140           | 4              | DDB                           |
| 49            | 11             | DDB                           | 140           | 39             | 0.41                          |
| 49            | 110            | DDB                           | 140           | 46             | DDB                           |
| 49            | 140            | DDB                           | 140           | 110            | 1.36                          |
| 49            | 174            | DDB                           | 140           | 174            | 1.07                          |
| 50            | 4              | 3.84                          | 141           | 11             | DDB                           |
| 50            | 31             | DDB                           | 141           | 110            | DDB                           |
| 141           | 140            | DDB                           | 750           | 91             | DDB                           |
| 141           | 174            | 1.06                          | 766           | 11             | DDB                           |
| 157           | 4              | 3.59                          | 766           | 110            | DDB                           |
| 157           | 21             | 1.47                          | 766           | 140            | DDB                           |
| 157           | 50             | DDB                           | 766           | 174            | DDB                           |
| 161           | 3              | 3.33                          | 812           | 11             | DDB                           |
| 161           | 31             | DDB                           | 812           | 110            | DDB                           |
| 161           | 50             | DDB                           | 812           | 140            | DDB                           |
| 161           | 89             | 3.95                          | 812           | 174            | DDB                           |
| 161           | 91             | 3.35                          | 817           | 11             | DDB                           |
| 161           | 110            | DDB                           | 817           | 110            | DDB                           |
| 174           | 3              | DDB                           | 817           | 140            | DDB                           |
| 174           | 4              | DDB                           | 817           | 174            | DDB                           |
| 174           | 11             | 1.20                          | 817           | 282            | DDB                           |
| 174           | 80             | 2.83                          | 1050          | 11             | DDB                           |
| 174           | 140            | 0.74                          | 1050          | 110            | 6.20                          |
| 174           | 284            | DDB                           | 1050          | 140            | DDB                           |
| 174           | 430            | 3.26                          | 1050          | 174            | DDB                           |
| 174           | 516            | DDB                           | 1594          | 89             | DDB                           |
| 230           | 174            | 0.95                          | 1594          | 91             | DDB                           |
| 230           | 284            | DDB                           | 1594          | 110            | DDB                           |
| 235           | 11             | DDB                           | 1642          | 11             | DDB                           |
| 235           | 110            | DDB                           | 1642          | 140            | DDB                           |
| 235           | 140            | DDB                           | 1642          | 174            | DDB                           |
| 235           | 174            | 0.96                          | 1645          | 11             | DDB                           |
| 297           | 31             | 2.27                          | 1645          | 110            | DDB                           |
| 297           | 50             | 1.63                          | 1645          | 140            | DDB                           |

Continued on next page

Continued from previous page

| <b>Solute</b> | <b>Solvent</b> | $D_{ij}^\infty \times 10^9$ | <b>Solute</b> | <b>Solvent</b> | $D_{ij}^\infty \times 10^9$ |
|---------------|----------------|-----------------------------|---------------|----------------|-----------------------------|
| DDB No.       | DDB No.        | m <sup>2</sup> /s           | DDB No.       | DDB No.        | m <sup>2</sup> /s           |
| 308           | 174            | DDB                         | 1645          | 174            | DDB                         |
| 308           | 284            | DDB                         | 2542          | 89             | DDB                         |
| 372           | 11             | DDB                         | 2542          | 91             | DDB                         |
| 372           | 110            | DDB                         | 2945          | 11             | DDB                         |
| 430           | 80             | 2.15                        | 2945          | 110            | DDB                         |
| 430           | 174            | 1.17                        | 2945          | 140            | DDB                         |
| 516           | 78             | 0.94                        | 2945          | 174            | DDB                         |
| 516           | 89             | 2.20                        | 6529          | 110            | DDB                         |
| 750           | 89             | DDB                         | 6529          | 174            | DDB                         |

## S.7 Stan code

In the following, we provide the Stan codes for the training of all MCMs used in this work: the data-driven MCM, MCM-Boosting, and MCM-Whisky. For MCM-Whisky, the codes of the two training steps, distillation and maturation, are given individually. An executable form of this code is included for download in the form of .stan files. To run the code, users will need to install an interface of their choice from the project’s homepage (<https://mc-stan.org/users/interfaces/>). For further information, we refer to Stan’s excellent documentation: <https://mc-stan.org/users/documentation/>.

Furthermore, we have included a wrapper code for each MCM, i.e., a MATLAB script that reads the training data from a .csv file, applies the developed MCMs for the prediction of the full matrix, and exports the result to a .csv file.

### S.7.1 Data-driven MCM

```

1 data {
2   int<lower=0> I; // number of solutes
3   int<lower=0> J; // number of solvents
4   int<lower=0> K; // number of latent dimensions
5   real ln_D[I,J]; // matrix of logarithmic diffusion
      coefficients
6   real<lower=0> sigma_0; // prior standard deviation
7   real<lower=0> lambda; // likelihood scale
8 }
9
10 parameters {
11   vector[K] u[I]; // solute feature vectors
12   vector[K] v[J]; // solvent feature vectors
13 }
14
```

```

15 model {
16   // prior: draw feature vectors for all solutes and
      solvents:
17   for (i in 1:I)
18     u[i] ~ normal(0,sigma_0);
19   for (j in 1:J)
20     v[j] ~ normal(0,sigma_0);
21   // likelihood: model the probability of ln_D as a
      normal distribution
22   // around the dot product of the feature vectors:
23   for (i in 1:I) {
24     for (j in 1:J) {
25       if (ln_D[i,j] != -99) { // train to available
          data only
26         ln_D[i,j] ~ normal(u[i]' * v[j], lambda);
27       }
28     }
29   }
30 }

```

### S.7.2 MCM-Boosting

```

1 data {
2   int<lower=0> I; // number of solutes
3   int<lower=0> J; // number of solvents
4   int<lower=0> K; // number of latent dimensions
5   real R[I,J]; // matrix of residuals of logarithmic
      diffusion coefficients
6   real<lower=0> sigma_0; // prior standard deviation
7   real<lower=0> lambda; // likelihood scale
8 }
9
10 parameters {
11   vector[K] u[I]; // solute feature vectors
12   vector[K] v[J]; // solvent feature vectors
13 }
14
15 model {
16   // prior: draw feature vectors for all solutes and
      solvents:
17   for (i in 1:I)
18     u[i] ~ normal(0,sigma_0);
19   for (j in 1:J)
20     v[j] ~ normal(0,sigma_0);

```

```

21 // likelihood: model the probability of R as a
    normal distribution around the dot product of
    the feature vectors:
22 for (i in 1:I) {
23   for (j in 1:J) {
24     if (R[i,j] != -99) { // train to available
        data only
25       R[i,j] ~ normal(u[i]' * v[j], lambda);
26     }
27   }
28 }
29 }

```

### S.7.3 MCM-Whisky: Distillation

```

1 data {
2   int<lower=0> I; // number of solutes
3   int<lower=0> J; // number of solvents
4   int<lower=0> K; // number of latent dimensions
5   real ln_D[I,J]; // matrix of logarithmic diffusion
    coefficients
6   real<lower=0> sigma_0; // prior standard deviation
7   real<lower=0> lambda; // likelihood scale
8 }
9
10 parameters {
11   vector[K] u[I]; // solute feature vectors
12   vector[K] v[J]; // solvent feature vectors
13 }
14
15 model {
16   // prior: draw feature vectors for all solutes and
    solvents:
17   for (i in 1:I)
18     u[i] ~ normal(0,sigma_0);
19   for (j in 1:J)
20     v[j] ~ normal(0,sigma_0);
21   // likelihood: model the probability of ln_D as a
    normal distribution around the dot product of
    the feature vectors:
22   for (i in 1:I) {
23     for (j in 1:J) {
24       if (ln_D[i,j] != -99) { // train to available
        data only
25         ln_D[i,j] ~ cauchy(u[i]' * v[j], lambda);

```

```

26     }
27   }
28 }
29 }

```

#### S.7.4 MCM-Whisky: Maturation

```

1 data {
2   int<lower=0> I; // number of solutes
3   int<lower=0> J; // number of solvents
4   int<lower=0> K; // number of latent dimensions
5   real ln_D[I,J]; // matrix of logarithmic diffusion
      coefficients
6   real<lower=0> lambda; // likelihood scale
7   vector<lower=0>[K] sigma_0_u[I]; // Prior standard
      deviation (Solute)
8   vector<lower=0>[K] sigma_0_v[J]; // Prior standard
      deviation (Solvent)
9   vector[K] mu_0_u[I]; // prior mean (Solute)
10  vector[K] mu_0_v[J]; // prior mean (Solvent)
11 }
12
13 parameters {
14   vector[K] u[I]; // solute feature vectors
15   vector[K] v[J]; // solvent feature vectors
16 }
17
18 model {
19   // prior: draw feature vectors for all solutes and
      solvents:
20   for (i in 1:I)
21     u[i] ~ normal(mu_0_u[i],sigma_0_u[i]);
22   for (j in 1:J)
23     v[j] ~ normal(mu_0_v[j],sigma_0_v[j]);
24   // likelihood: model the probability of ln_D as a
      normal distribution around the dot product of
      the feature vectors:
25   for (i in 1:I) {
26     for (j in 1:J) {
27       if (ln_D[i,j] != -99) { //available data only
28         ln_D[i,j] ~ normal(u[i]' * v[j], lambda);
29       }
30     }
31   }
32 }

```

## References

- [1] R. L. Rowley, W. V. Wilding, J. L. Oscarson, Y. Yang, N. A. Zundel, T. E. Daubert and R. P. Danner, *DIPPR Data Compilation of Pure Chemical Properties*, Design Institute for Physical Properties, AIChE, 2003, <https://www.aiche.org/dippr>, Database date: 2018, retrieved via The DIPPR Information and Data Evaluation Manager for the Design Institute for Physical Properties - Version 12.3.0 (May 2018 Public).
- [2] O. R. Quayle, *Chem. Rev.*, 1953, **53**, 439–589.
- [3] J. R. Partington, *An Advanced Treatise on Physical Chemistry, Vol. I, Fundamental Principles: The Properties of Gases*, Longmans, London, 1949.
- [4] C. R. Wilke and P. Chang, *AIChE J.*, 1955, **1**, 264–270.
- [5] K. A. Reddy and L. K. Doraiswamy, *Ind. Eng. Chem. Fundam.*, 1967, **6**, 77–79.
- [6] E. G. Scheibel, *Ind. Eng. Chem.*, 1954, **46**, 2007–2008.
- [7] M. T. Tyn and W. F. Calus, *J. Chem. Eng. Data*, 1975, **20**, 106–109.
- [8] B. E. Poling, J. M. Prausnitz and J. P. O’Connell, *The Properties of Gases and Liquids*, McGraw-Hill, New York, 2001.
- [9] A. Einstein, *Ann. Phys.*, 1905, **322**, 549–560.
- [10] A. Gierer and K. Wirtz, *Z. Naturforsch.*, 1953, **8**, 522–532.
- [11] R. Evans, G. Dal Poggetto, M. Nilsson and G. A. Morris, *Anal. Chem.*, 2018, **90**, 3987–3994.
- [12] D. R. Olander, *AIChE J.*, 1961, **7**, 175–176.
- [13] *Dortmund Data Bank*, 2019, [www.ddbst.com](http://www.ddbst.com).
